# Supplementary material for: Vitamin D interacts with Esr1 and Igf1 to regulate molecular pathways relevant to Alzheimer’s disease
Source: Mol Neurodegener. 2016 Mar 1;11:22. doi: 10.1186/s13024-016-0087-2 (PMC4774101; doi:10.1186/s13024-016-0087-2)
Supplement: Additional file 2: — Comparative analysis of DEGs between different conditions. Table S2. Common DEGs between cortex and hippocampus in Wt mice supplemented with vitamin D3. Table S3. Specific DEGs in cortex of Wt mice supplemented with vitamin D3. Table S4. Specific DEGs in hippocampus of Wt mice supplemented with vitamin D3. Table S5. Common DEGs between cortex and hippocampus in Tg mice supplemented with vitamin D3. Table S6. Specific DEGs in cortex of Tg mice supplemented with vitamin D3. Table S7. Specific DEGs in hippocampus of Tg mice supplemented with vitamin D3. Table S8. Common DEGs between cortex and hippocampus of both Wt and Tg mice supplemented with vitamin D3. (XLSX 214 kb) [file 13024_2016_87_MOESM2_ESM.xlsx]

## Sheet: Table S2
COMMON DEGs BETWEEN CORTEX AND HIPPOCAMPUS IN WTVD+ AT M9
Gene Symbol	Entrez Gene Name	FC Cortex	FC Hippocampus	Location	Type(s)
2610507I01Rik	RIKEN cDNA 2610507I01 gene	2.55	3.187	Other	other
2700022O18Rik	RIKEN cDNA 2700022O18 gene	1.743	-1.589	Other	other
2700099C18Rik	NDC80 homolog, kinetochore complex component pseudogene	1.788	1.601	Other	other
2900076A07Rik	RIKEN cDNA 2900076A07 gene	2.019	-2.42	Other	other
4930432E11Rik/4932431P20Rik	RIKEN cDNA 4932431P20 gene	2.885	2.118	Other	other
4930481A15Rik	RIKEN cDNA 4930481A15 gene	1.53	-1.946	Cytoplasm	enzyme
4930517G19Rik	RIKEN cDNA 4930517G19 gene	1.833	-1.936	Other	other
4933405E24Rik	RIKEN cDNA 4933405E24 gene	1.561	1.87	Other	other
4933409K07Rik	RIKEN cDNA 4933409K07 gene	1.822	2.36	Other	other
5730419F03Rik	RIKEN cDNA 5730419F03 gene	1.776	2.318	Other	other
9230102O04Rik	RIKEN cDNA 9230102O04 gene	2.234	-1.832	Other	other
A930018M24Rik	RIKEN cDNA A930018M24 gene	2.323	1.623	Other	other
ACE	angiotensin I converting enzyme	1.559	-1.738	Plasma Membrane	peptidase
ACTA2	actin, alpha 2, smooth muscle, aorta	-1.883	-1.556	Cytoplasm	other
AFF3	AF4/FMR2 family, member 3	2.981	-1.65	Nucleus	transcription regulator
AHCY	adenosylhomocysteinase	-2.065	-1.724	Cytoplasm	enzyme
AI852580	expressed sequence AI852580	1.685	-2.313	Other	other
AI987944 (includes others)	expressed sequence AI987944	-1.808	1.562	Other	other
ANGPTL7	angiopoietin-like 7	1.724	-1.617	Extracellular Space	other
AP1S2	adaptor-related protein complex 1, sigma 2 subunit	-1.578	1.697	Cytoplasm	transporter
ATG4C	autophagy related 4C, cysteine peptidase	-2.75	-2.715	Cytoplasm	peptidase
AUH	AU RNA binding protein/enoyl-CoA hydratase	1.537	1.544	Cytoplasm	enzyme
AVP	arginine vasopressin	2.211	-1.586	Extracellular Space	other
B020031M17Rik	RIKEN cDNA B020031M17 gene	1.586	1.924	Other	other
BC048679	cDNA sequence BC048679	10.287	3.385	Other	other
BUB1	BUB1 mitotic checkpoint serine/threonine kinase	-1.667	2.325	Nucleus	kinase
C3	complement component 3	-2.117	-9.103	Extracellular Space	peptidase
C130078N14	uncharacterized protein C130078N14	-2.166	-2.134	Other	other
C17orf85	chromosome 17 open reading frame 85	2.078	-1.577	Nucleus	other
CABP5	calcium binding protein 5	1.981	2.118	Cytoplasm	other
CAPN11	calpain 11	1.739	-1.513	Cytoplasm	peptidase
CARM1	coactivator-associated arginine methyltransferase 1	1.516	-1.625	Nucleus	transcription regulator
CASS4	Cas scaffolding protein family member 4	1.712	1.556	Other	other
CATSPER4	cation channel, sperm associated 4	1.807	1.732	Cytoplasm	transporter
Ccl8	chemokine (C-C motif) ligand 8	1.849	1.659	Extracellular Space	other
CCL21	chemokine (C-C motif) ligand 21	6.74	4.619	Extracellular Space	cytokine
CCL27	chemokine (C-C motif) ligand 27	2.21	2.01	Other	other
CD4	CD4 molecule	1.705	-1.608	Plasma Membrane	transmembrane receptor
CD1D	CD1d molecule	-1.531	1.527	Plasma Membrane	other
CD300LF	CD300 molecule-like family member f	2.009	2.849	Plasma Membrane	other
CD79A	CD79a molecule, immunoglobulin-associated alpha	1.845	-1.679	Plasma Membrane	transmembrane receptor
CDK5RAP1	CDK5 regulatory subunit associated protein 1	-2.138	-1.783	Extracellular Space	other
CELF3	CUGBP, Elav-like family member 3	1.564	1.679	Nucleus	transcription regulator
CFL1	cofilin 1 (non-muscle)	1.988	-1.51	Nucleus	other
CHD2	chromodomain helicase DNA binding protein 2	1.592	-1.515	Nucleus	enzyme
CHRM4	cholinergic receptor, muscarinic 4	1.61	-1.991	Plasma Membrane	G-protein coupled receptor
CIT	citron rho-interacting serine/threonine kinase	1.792	-1.595	Cytoplasm	kinase
CLCNKB	chloride channel, voltage-sensitive Kb	1.629	2.042	Plasma Membrane	ion channel
CLEC4A	C-type lectin domain family 4, member A	1.514	1.669	Plasma Membrane	transmembrane receptor
Cmya5	cardiomyopathy associated 5	1.795	2.125	Cytoplasm	other
CPB2	carboxypeptidase B2 (plasma)	1.886	-1.919	Extracellular Space	peptidase
CPNE1	copine I	-1.821	-1.561	Nucleus	transporter
CPPED1	calcineurin-like phosphoesterase domain containing 1	1.647	-1.708	Cytoplasm	enzyme
Cym	chymosin	1.634	-1.941	Other	peptidase
CYP17A1	cytochrome P450, family 17, subfamily A, polypeptide 1	2.183	-1.58	Cytoplasm	enzyme
Cyp2g1	cytochrome P450, family 2, subfamily g, polypeptide 1	-1.692	-2.127	Cytoplasm	enzyme
D230017M19Rik	RIKEN cDNA D230017M19 gene	1.573	1.671	Other	other
DCAF12L2	DDB1 and CUL4 associated factor 12-like 2	1.757	-1.505	Other	other
DNAJB8	DnaJ (Hsp40) homolog, subfamily B, member 8	1.977	-1.847	Other	other
Doc2g	double C2, gamma	-3.237	-1.582	Nucleus	other
Dsg1c	desmoglein 1 gamma	1.858	-1.829	Plasma Membrane	other
DYDC2	DPY30 domain containing 2	1.574	2.381	Extracellular Space	other
EIF2AK4	eukaryotic translation initiation factor 2 alpha kinase 4	1.899	1.572	Cytoplasm	kinase
EPAS1	endothelial PAS domain protein 1	-1.733	-1.509	Nucleus	transcription regulator
EPGN	epithelial mitogen	1.572	-1.92	Extracellular Space	growth factor
Erdr1	erythroid differentiation regulator 1	-1.539	-1.662	Other	other
ERMAP	erythroblast membrane-associated protein (Scianna blood group)	1.582	-1.959	Cytoplasm	other
ERMN	ermin, ERM-like protein	1.58	1.87	Extracellular Space	other
FAM13C	family with sequence similarity 13, member C	-1.974	2.85	Other	other
FAM205A	family with sequence similarity 205, member A	2.777	2.341	Nucleus	other
FKBP1A	FK506 binding protein 1A, 12kDa	1.621	1.97	Cytoplasm	enzyme
FMO5	flavin containing monooxygenase 5	-1.741	-1.548	Cytoplasm	enzyme
FMOD	fibromodulin	-1.512	-1.667	Extracellular Space	other
Fmr1nb	fragile X mental retardation 1 neighbor	1.978	2.009	Other	other
FOXD2	forkhead box D2	-1.576	-1.586	Nucleus	transcription regulator
FOXL2	forkhead box L2	1.583	-1.759	Nucleus	transcription regulator
Foxp1	forkhead box P1	1.841	1.52	Nucleus	transcription regulator
FRMD3	FERM domain containing 3	-1.656	5.672	Other	other
GATAD2A	GATA zinc finger domain containing 2A	1.854	1.782	Nucleus	transcription regulator
GBP6	guanylate binding protein family, member 6	2.206	2.193	Cytoplasm	enzyme
GCM1	glial cells missing homolog 1 (Drosophila)	2.013	1.623	Nucleus	transcription regulator
GFAP	glial fibrillary acidic protein	-1.82	-2.428	Cytoplasm	other
GLOD4	glyoxalase domain containing 4	1.582	1.555	Cytoplasm	enzyme
Gm3526	predicted gene 3526	1.557	1.688	Other	other
Gm3893	predicted gene 3893	3.352	3.243	Other	other
Gm4924	predicted gene 4924	1.942	1.684	Cytoplasm	other
Gm5106	predicted gene 5106	2.19	7.576	Other	other
Gm5215	predicted gene 5215	2.277	1.664	Cytoplasm	other
Gm6507	predicted gene 6507	1.823	1.583	Other	other
Gm7166	predicted gene 7166	1.573	1.793	Other	other
Gm8230	predicted gene 8230	-1.6	-1.712	Other	other
Gm10654	predicted gene 10654	1.735	2.168	Other	other
Gm10848	predicted gene 10848	1.533	1.8	Other	other
Gm11175	predicted gene 11175	1.641	-1.514	Other	other
Gm14703	predicted gene 14703	1.573	-1.517	Other	other
Gm16505	predicted gene 16505	1.666	-1.879	Other	other
Gm3383 (includes others)	predicted gene 3383	-1.671	-127.943	Other	other
GNG7	guanine nucleotide binding protein (G protein), gamma 7	1.839	-1.591	Plasma Membrane	enzyme
GOLGB1	golgin B1	3.128	-3.03	Cytoplasm	other
GSTA5	glutathione S-transferase alpha 5	1.506	2.014	Cytoplasm	enzyme
H2-M11	histocompatibility 2, M region locus 11	2.01	-2.168	Other	other
H2-T3	histocompatibility 2, T region locus 3	1.504	-2.466	Plasma Membrane	transmembrane receptor
HCN2	hyperpolarization activated cyclic nucleotide gated potassium channel 2	1.639	-1.74	Plasma Membrane	ion channel
HERC2	HECT and RLD domain containing E3 ubiquitin protein ligase 2	1.589	1.604	Cytoplasm	enzyme
HIST2H2BF	histone cluster 2, H2bf	1.543	2.361	Nucleus	other
HIST4H4	histone cluster 4, H4	1.543	-1.82	Nucleus	other
HLA-DRB5	major histocompatibility complex, class II, DR beta 5	1.525	1.857	Plasma Membrane	transmembrane receptor
HMBOX1	homeobox containing 1	1.869	-1.507	Nucleus	transcription regulator
IGF1	insulin-like growth factor 1 (somatomedin C)	-1.629	-1.551	Extracellular Space	growth factor
IGF2	insulin-like growth factor 2	1.796	-1.57	Extracellular Space	growth factor
INADL	InaD-like (Drosophila)	-1.804	-1.687	Plasma Membrane	other
Iqcf4	IQ motif containing F4	2.216	2.74	Other	other
IQSEC3	IQ motif and Sec7 domain 3	4.493	-5.233	Cytoplasm	other
IRAK2	interleukin-1 receptor-associated kinase 2	1.644	-2.737	Plasma Membrane	kinase
IRF6	interferon regulatory factor 6	-1.799	-2.072	Nucleus	transcription regulator
IRS1	insulin receptor substrate 1	1.558	-1.524	Cytoplasm	enzyme
KCNJ6	potassium channel, inwardly rectifying subfamily J, member 6	1.931	1.61	Plasma Membrane	ion channel
KCNQ1OT1	KCNQ1 opposite strand/antisense transcript 1 (non-protein coding)	1.645	1.609	Other	other
KCTD11	potassium channel tetramerization domain containing 11	1.868	-2.139	Cytoplasm	other
KDR	kinase insert domain receptor	1.683	-1.599	Plasma Membrane	kinase
KHSRP	KH-type splicing regulatory protein	1.736	-2.045	Nucleus	enzyme
KIF12	kinesin family member 12	1.709	-1.667	Cytoplasm	other
KIF1A	kinesin family member 1A	-1.554	-1.636	Cytoplasm	other
KIN	Kin17 DNA and RNA binding protein	1.825	1.635	Nucleus	other
KIRREL3	kin of IRRE like 3 (Drosophila)	-1.502	-1.52	Extracellular Space	other
KLHL30	kelch-like family member 30	-1.652	7.056	Other	other
Klra4 (includes others)	killer cell lectin-like receptor, subfamily A, member 4	2.23	1.601	Plasma Membrane	transmembrane receptor
LACTB	lactamase, beta	-2.5	-2.048	Cytoplasm	other
LAMA1	laminin, alpha 1	-1.622	1.503	Extracellular Space	other
LEO1	Leo1, Paf1/RNA polymerase II complex component, homolog (S. cerevisiae)	-1.746	-1.862	Nucleus	other
LRP6	low density lipoprotein receptor-related protein 6	1.64	1.768	Plasma Membrane	transmembrane receptor
MAP3K5	mitogen-activated protein kinase kinase kinase 5	1.553	-2.621	Cytoplasm	kinase
MASP2	mannan-binding lectin serine peptidase 2	1.72	1.537	Extracellular Space	peptidase
MDK	midkine (neurite growth-promoting factor 2)	1.938	1.769	Extracellular Space	growth factor
Mirg	miRNA containing gene	1.88	-1.911	Other	other
Mrgpra7	MAS-related GPR, member A7	3.237	3.631	Other	other
MRGPRG	MAS-related GPR, member G	1.974	1.724	Plasma Membrane	G-protein coupled receptor
MRPL55	mitochondrial ribosomal protein L55	1.554	1.665	Cytoplasm	other
MYO7A	myosin VIIA	1.994	1.809	Cytoplasm	enzyme
Naip1 (includes others)	NLR family, apoptosis inhibitory protein 1	-1.934	1.581	Other	other
NANOG	Nanog homeobox	1.526	-2.906	Nucleus	transcription regulator
NFYA	nuclear transcription factor Y, alpha	1.542	-1.586	Nucleus	transcription regulator
NHSL2	NHS-like 2	2.538	1.678	Other	other
NOTCH1	notch 1	1.592	2.511	Plasma Membrane	transcription regulator
NPPA	natriuretic peptide A	-1.952	-2.036	Extracellular Space	other
NPTX2	neuronal pentraxin II	-1.875	-1.883	Extracellular Space	other
OCEL1	occludin/ELL domain containing 1	-3.981	-3.071	Other	other
OMP	olfactory marker protein	-10.412	-1.542	Cytoplasm	other
Oxct2a/Oxct2b	3-oxoacid CoA transferase 2A	1.578	-2.077	Cytoplasm	enzyme
OXT	oxytocin/neurophysin I prepropeptide	4.04	-2.749	Extracellular Space	other
PAPLN	papilin, proteoglycan-like sulfated glycoprotein	1.81	-2.053	Extracellular Space	other
PER1	period circadian clock 1	1.866	1.592	Nucleus	other
PIGN	phosphatidylinositol glycan anchor biosynthesis, class N	1.703	-1.538	Cytoplasm	enzyme
PMCH	pro-melanin-concentrating hormone	2.135	3.305	Extracellular Space	other
PNMA2	paraneoplastic Ma antigen 2	1.715	1.797	Nucleus	transporter
PPIH	peptidylprolyl isomerase H (cyclophilin H)	2.075	2.217	Nucleus	enzyme
PPP1R16B	protein phosphatase 1, regulatory subunit 16B	2.387	2.293	Plasma Membrane	phosphatase
Prh1/Prp2	proline rich protein HaeIII subfamily 1	1.508	-2.037	Other	other
PRKCD	protein kinase C, delta	-2.522	-2.184	Cytoplasm	kinase
PRL	prolactin	-1.878	1.929	Extracellular Space	cytokine
Prm1	protamine 1	1.614	-1.646	Nucleus	other
PRSS37	protease, serine, 37	1.601	-2.04	Extracellular Space	peptidase
PSAPL1	prosaposin-like 1 (gene/pseudogene)	3.163	1.862	Cytoplasm	other
RABGAP1	RAB GTPase activating protein 1	1.98	2.25	Cytoplasm	other
RAVER1	ribonucleoprotein, PTB-binding 1	1.654	-2.289	Nucleus	other
RBBP4	retinoblastoma binding protein 4	-2.06	-1.623	Nucleus	enzyme
REC8	REC8 meiotic recombination protein	-2.121	-1.9	Nucleus	other
RGS9	regulator of G-protein signaling 9	1.711	1.728	Cytoplasm	enzyme
RHOH	ras homolog family member H	1.566	-1.703	Plasma Membrane	enzyme
RNASE4	ribonuclease, RNase A family, 4	2.123	1.61	Extracellular Space	enzyme
Rnu1b6	U1b6 small nuclear RNA	2.496	2.478	Other	other
RREB1	ras responsive element binding protein 1	1.698	1.671	Nucleus	transcription regulator
RS1	retinoschisin 1	1.728	1.627	Extracellular Space	other
RXRG	retinoid X receptor, gamma	2.069	-1.624	Nucleus	ligand-dependent nuclear receptor
SDC4	syndecan 4	1.948	2.384	Plasma Membrane	other
SDCBP	syndecan binding protein (syntenin)	1.766	1.542	Plasma Membrane	enzyme
Serpina3b/Serpina3j	serine (or cysteine) peptidase inhibitor, clade A (alpha-1 antiproteinase, antitrypsin), member 3J	2.541	-1.656	Extracellular Space	other
Serpina3g (includes others)	serine (or cysteine) peptidase inhibitor, clade A, member 3G	1.944	2.778	Other	other
SFI1	Sfi1 homolog, spindle assembly associated (yeast)	1.583	1.595	Cytoplasm	other
SHANK1	SH3 and multiple ankyrin repeat domains 1	1.648	-1.696	Cytoplasm	other
SHC4	SHC (Src homology 2 domain containing) family, member 4	2.142	2.129	Cytoplasm	other
SLC16A7	solute carrier family 16 (monocarboxylate transporter), member 7	1.534	1.729	Plasma Membrane	transporter
SLC17A6	solute carrier family 17 (vesicular glutamate transporter), member 6	-1.558	-1.71	Plasma Membrane	transporter
SLC26A1	solute carrier family 26 (anion exchanger), member 1	1.808	-1.711	Plasma Membrane	transporter
SLC45A3	solute carrier family 45, member 3	1.516	-1.918	Cytoplasm	other
SMO	smoothened, frizzled class receptor	1.938	-1.518	Plasma Membrane	G-protein coupled receptor
SMOC1	SPARC related modular calcium binding 1	-1.665	-1.622	Extracellular Space	other
SNHG3	small nucleolar RNA host gene 3	-1.767	-1.664	Nucleus	other
ST6GALNAC1	ST6 (alpha-N-acetyl-neuraminyl-2,3-beta-galactosyl-1,3)-N-acetylgalactosaminide alpha-2,6-sialyltransferase 1	2.364	2.367	Cytoplasm	enzyme
Stfa2/Stfa2l1	stefin A2	1.642	-1.82	Cytoplasm	other
STK16	serine/threonine kinase 16	1.718	-1.745	Cytoplasm	kinase
SV2C	synaptic vesicle glycoprotein 2C	2.136	1.616	Plasma Membrane	other
SYN3	synapsin III	2.085	2.12	Plasma Membrane	other
SYT10	synaptotagmin X	1.872	-2.506	Cytoplasm	transporter
TBX22	T-box 22	2.826	3.177	Nucleus	transcription regulator
TDGF1	teratocarcinoma-derived growth factor 1	2.514	2.038	Plasma Membrane	other
TERC	telomerase RNA component	1.725	-1.844	Other	other
TLR2	toll-like receptor 2	-1.552	1.501	Plasma Membrane	transmembrane receptor
TMEM138	transmembrane protein 138	1.593	-1.748	Extracellular Space	other
TNNC2	troponin C type 2 (fast)	-1.672	3.924	Cytoplasm	other
TNNT2	troponin T type 2 (cardiac)	-2.015	-2.933	Cytoplasm	other
TRH	thyrotropin-releasing hormone	-1.771	-2.713	Extracellular Space	other
Trim12a	tripartite motif-containing 12A	1.769	2.223	Cytoplasm	other
Trim43a (includes others)	tripartite motif-containing 43A	1.73	-1.631	Other	other
TRIOBP	TRIO and F-actin binding protein	2.008	-1.53	Nucleus	other
TRPM1	transient receptor potential cation channel, subfamily M, member 1	1.599	2.349	Plasma Membrane	ion channel
TULP1	tubby like protein 1	2.337	-1.543	Nucleus	transcription regulator
ULK3	unc-51 like kinase 3	1.832	-3.352	Cytoplasm	kinase
Vmn1r180 (includes others)	vomeronasal 1 receptor 180	-1.617	-3.968	Other	other
Vmn1r214 (includes others)	vomeronasal 1 receptor 214	1.654	-1.866	Plasma Membrane	G-protein coupled receptor
Wfdc6b	WAP four-disulfide core domain 6B	1.75	-1.891	Other	other
Xlr3c (includes others)	X-linked lymphocyte-regulated 3C	-4.249	-3.759	Other	other
Xlr4a (includes others)	X-linked lymphocyte-regulated 4A	-2.482	-2.843	Other	other
YBX1	Y box binding protein 1	2.087	2.521	Nucleus	transcription regulator
Zfp874a/Zfp874b	zinc finger protein 874b	-2.389	-2.731	Other	other
ZNF93	zinc finger protein 93	1.618	-2.745	Nucleus	transcription regulator
ZNF616	zinc finger protein 616	1.567	1.551	Nucleus	other
ZNF669	zinc finger protein 669	-1.898	-2.079	Other	other

## Sheet: Table S3
SPECIFIC DEGs FOR CORTEX IN WTVD+ AT M9
Gene Symbol	Entrez Gene Name	FC Cortex	Location	Type(s)
1110002E22Rik	RIKEN cDNA 1110002E22 gene	-1.803	Other	other
1700023D09Rik	RIKEN cDNA 1700023D09 gene	1.607	Other	other
1700028I16Rik	RIKEN cDNA 1700028I16 gene	1.624	Other	other
1700084M14Rik	Gm5941 pseudogene	-1.821	Other	other
1700086P04Rik	RIKEN cDNA 1700086P04 gene	2.2	Other	other
1700112J05Rik	RIKEN cDNA 1700112J05 gene	-3.587	Other	other
2010007H06Rik	RIKEN cDNA 2010007H06 gene	-1.863	Other	other
2210407C18Rik	RIKEN cDNA 2210407C18 gene	1.532	Other	other
2410087M07Rik	RIKEN cDNA 2410087M07 gene	1.783	Other	other
2610005L07Rik	cadherin 11 pseudogene	1.623	Other	other
2610020P09Rik	RIKEN cDNA 2610020P09 gene	2.07	Other	other
2610318N02Rik	RIKEN cDNA 2610318N02 gene	2.142	Other	other
2810001G20Rik	RIKEN cDNA 2810001G20 gene	1.509	Other	other
2810410L24Rik	RIKEN cDNA 2810410L24 gene	1.527	Other	other
3110035C09Rik	RIKEN cDNA 3110035C09 gene	-1.57	Other	other
3930401B19Rik	RIKEN cDNA 3930401B19 gene	1.783	Other	other
4921509O07Rik	RIKEN cDNA 4921509O07 gene	1.652	Other	other
4921539H07Rik	RIKEN cDNA 4921539H07 gene	1.759	Other	other
4930433I11Rik	RIKEN cDNA 4930433I11 gene	1.991	Other	other
4930452L12Rik	RIKEN cDNA 4930452L12 gene	9.251	Other	other
4930517E11Rik	RIKEN cDNA 4930517E11 gene	2.159	Other	other
4930548H24Rik	RIKEN cDNA 4930548H24 gene	-1.671	Other	other
4930556M19Rik	RIKEN cDNA 4930556M19 gene	1.552	Other	other
4930594M17Rik	RIKEN cDNA 4930594M17 gene	-1.975	Other	other
4932443I19Rik	RIKEN cDNA 4932443I19 gene	-2.103	Other	other
4933421H12Rik	RIKEN cDNA 4933421H12 gene	2.051	Other	other
4933425D22Rik	RIKEN cDNA 4933425D22 gene	-1.881	Other	other
4933428M09Rik	RIKEN cDNA 4933428M09 gene	1.887	Other	other
4933430L12Rik	RIKEN cDNA 4933430L12 gene	-1.616	Other	other
4933433G08Rik	RIKEN cDNA 4933433G08 gene	-2.285	Other	other
5730408K05Rik	RIKEN cDNA 5730408K05 gene	1.521	Other	other
6330522J23Rik	RIKEN cDNA 6330522J23 gene	1.663	Other	other
6430553K19Rik	RIKEN cDNA 6430553K19 gene	-1.715	Other	other
6430628N08Rik	RIKEN cDNA 6430628N08 gene	-1.53	Other	other
8030456M14Rik	RIKEN cDNA 8030456M14 gene	1.546	Other	other
9130204L05Rik (includes others)	RIKEN cDNA 9130204L05 gene	2.015	Other	other
9430007A20Rik	RIKEN cDNA 9430007A20 gene	1.833	Other	other
9430078G10Rik	RIKEN cDNA 9430078G10 gene	-6.116	Other	other
9530062K07Rik	RIKEN cDNA 9530062K07 gene	-1.503	Other	other
9530091C08Rik	RIKEN cDNA 9530091C08 gene	1.62	Other	other
9630028H03Rik	RIKEN cDNA 9630028H03 gene	1.531	Other	other
A030001D16Rik	RIKEN cDNA A030001D16 gene	-1.511	Other	other
A230009B12Rik	RIKEN cDNA A230009B12 gene	-1.504	Other	other
A230057D06Rik	RIKEN cDNA A230057D06 gene	1.747	Other	other
A230098N10Rik	RIKEN cDNA A230098N10 gene	-1.589	Other	other
A330033J07Rik	RIKEN cDNA A330033J07 gene	2.314	Other	other
A330074H02Rik	RIKEN cDNA A330074H02 gene	1.585	Other	other
A3GALT2	alpha 1,3-galactosyltransferase 2	1.967	Other	enzyme
A430078G23Rik	RIKEN cDNA A430078G23 gene	-1.645	Other	other
A430110L20Rik	RIKEN cDNA A430110L20 gene	1.571	Other	other
A530028O18	uncharacterized protein A530028O18	6.182	Other	other
A630001G21Rik	RIKEN cDNA A630001G21 gene	1.733	Other	other
A630057N01Rik	RIKEN cDNA A630057N01 gene	2.083	Other	other
A630065K11Rik	RIKEN cDNA A630065K11 gene	-1.523	Other	other
A730032A03Rik	RIKEN cDNA A730032A03 gene	1.546	Other	other
A830011I04	uncharacterized protein A830011I04	-1.528	Other	other
A830092H15Rik	RIKEN cDNA A830092H15 gene	1.513	Other	other
AA522020	expressed sequence AA522020	1.643	Other	other
AA623943/Gm11546	predicted gene 11546	1.899	Other	other
AADAC	arylacetamide deacetylase	1.586	Cytoplasm	enzyme
ABCD1	ATP-binding cassette, sub-family D (ALD), member 1	-1.494	Plasma Membrane	transporter
ABHD4	abhydrolase domain containing 4	-1.647	Other	peptidase
ABHD12B	abhydrolase domain containing 12B	-1.749	Other	peptidase
ACAT2	acetyl-CoA acetyltransferase 2	1.737	Cytoplasm	enzyme
ACIN1	apoptotic chromatin condensation inducer 1	1.532	Nucleus	enzyme
ACP1	acid phosphatase 1, soluble	1.61	Cytoplasm	phosphatase
ACPT	acid phosphatase, testicular	-4.831	Other	phosphatase
ACTN2	actinin, alpha 2	1.554	Nucleus	transcription regulator
Adam1a	a disintegrin and metallopeptidase domain 1a	-1.725	Plasma Membrane	peptidase
ADAMTS2	ADAM metallopeptidase with thrombospondin type 1 motif, 2	-1.651	Extracellular Space	peptidase
ADAMTS19	ADAM metallopeptidase with thrombospondin type 1 motif, 19	-2.066	Extracellular Space	peptidase
Adh6b	alcohol dehydrogenase 6B (class V)	1.57	Other	other
Adig	adipogenin	1.583	Other	other
ADORA2A	adenosine A2a receptor	1.955	Plasma Membrane	G-protein coupled receptor
AF366264 (includes others)	cDNA sequence AF366264	-1.608	Nucleus	peptidase
AFP	alpha-fetoprotein	2.357	Extracellular Space	transporter
AGXT2	alanine--glyoxylate aminotransferase 2	-3.411	Cytoplasm	enzyme
AHDC1	AT hook, DNA binding motif, containing 1	1.661	Other	other
AHNAK	AHNAK nucleoprotein	2.111	Nucleus	other
AI414108	expressed sequence AI414108	1.853	Other	other
AI504432	expressed sequence AI504432	1.513	Other	other
AIG1	androgen-induced 1	1.642	Other	other
AIM1	absent in melanoma 1	-1.786	Extracellular Space	other
AKAP6	A kinase (PRKA) anchor protein 6	1.687	Nucleus	other
AKAP11	A kinase (PRKA) anchor protein 11	1.826	Cytoplasm	other
AKAP13	A kinase (PRKA) anchor protein 13	2.437	Cytoplasm	other
Akap17b	A kinase (PRKA) anchor protein 17B	2.176	Other	other
ALDH1A2	aldehyde dehydrogenase 1 family, member A2	-1.734	Cytoplasm	enzyme
ALDH6A1	aldehyde dehydrogenase 6 family, member A1	-1.499	Cytoplasm	enzyme
ALDOA	aldolase A, fructose-bisphosphate	-1.506	Cytoplasm	enzyme
ALOXE3	arachidonate lipoxygenase 3	-1.684	Extracellular Space	enzyme
ALS2CR12	amyotrophic lateral sclerosis 2 (juvenile) chromosome region, candidate 12	-1.498	Cytoplasm	other
AMBP	alpha-1-microglobulin/bikunin precursor	-1.769	Extracellular Space	transporter
ANKK1	ankyrin repeat and kinase domain containing 1	1.955	Cytoplasm	kinase
ANKRD11	ankyrin repeat domain 11	1.695	Nucleus	other
ANKRD12	ankyrin repeat domain 12	1.749	Nucleus	other
ANKRD13B	ankyrin repeat domain 13B	-1.5	Plasma Membrane	other
ANKRD33B	ankyrin repeat domain 33B	-2.19	Other	other
ANO2	anoctamin 2, calcium activated chloride channel	1.589	Plasma Membrane	ion channel
Anp32a	acidic (leucine-rich) nuclear phosphoprotein 32 family, member A	1.793	Nucleus	other
ANXA1	annexin A1	-1.64	Plasma Membrane	enzyme
ANXA8/ANXA8L1	annexin A8-like 1	-1.68	Plasma Membrane	other
AOC3	amine oxidase, copper containing 3	1.575	Plasma Membrane	enzyme
APOBEC2	apolipoprotein B mRNA editing enzyme, catalytic polypeptide-like 2	2.006	Other	enzyme
APOC2	apolipoprotein C-II	1.727	Extracellular Space	transporter
APOD	apolipoprotein D	-1.889	Extracellular Space	transporter
APOE	apolipoprotein E	-1.503	Extracellular Space	transporter
AQP6	aquaporin 6, kidney specific	-1.651	Cytoplasm	transporter
AQR	aquarius intron-binding spliceosomal factor	-1.677	Nucleus	other
AR	androgen receptor	1.818	Nucleus	ligand-dependent nuclear receptor
ARFGAP2	ADP-ribosylation factor GTPase activating protein 2	-1.653	Nucleus	other
ARHGAP17	Rho GTPase activating protein 17	1.563	Cytoplasm	other
ARHGAP21	Rho GTPase activating protein 21	-1.529	Cytoplasm	other
ARHGEF1	Rho guanine nucleotide exchange factor (GEF) 1	1.81	Cytoplasm	other
ARHGEF9	Cdc42 guanine nucleotide exchange factor (GEF) 9	1.59	Cytoplasm	other
ARID4A	AT rich interactive domain 4A (RBP1-like)	1.945	Nucleus	transcription regulator
ARL15	ADP-ribosylation factor-like 15	-1.502	Cytoplasm	other
ARPP21	cAMP-regulated phosphoprotein, 21kDa	2.773	Cytoplasm	other
Arxes1/Arxes2	adipocyte-related X-chromosome expressed sequence 2	-1.737	Cytoplasm	other
ASH1L	ash1 (absent, small, or homeotic)-like (Drosophila)	1.707	Nucleus	transcription regulator
ASPH	aspartate beta-hydroxylase	1.654	Cytoplasm	enzyme
ASXL2	additional sex combs like transcriptional regulator 2	1.503	Extracellular Space	other
ATAD5	ATPase family, AAA domain containing 5	-1.644	Extracellular Space	other
ATP2B1	ATPase, Ca++ transporting, plasma membrane 1	1.601	Plasma Membrane	transporter
ATP2B2	ATPase, Ca++ transporting, plasma membrane 2	1.846	Plasma Membrane	transporter
ATP8A2	ATPase, aminophospholipid transporter, class I, type 8A, member 2	1.595	Plasma Membrane	transporter
AURKA	aurora kinase A	2.388	Nucleus	kinase
AURKB	aurora kinase B	-1.88	Nucleus	kinase
B020004J07Rik	RIKEN cDNA B020004J07 gene	1.7	Other	other
B130055M24Rik	RIKEN cDNA B130055M24 gene	-1.608	Other	other
B230334C09Rik	RIKEN cDNA B230334C09 gene	1.579	Other	other
BARX2	BARX homeobox 2	1.507	Nucleus	transcription regulator
BASP1	brain abundant, membrane attached signal protein 1	1.549	Nucleus	transcription regulator
BB287469 (includes others)	predicted gene 8300	1.716	Other	other
BBX	bobby sox homolog (Drosophila)	2.133	Nucleus	other
BC030870	cDNA sequence BC030870	1.582	Other	other
BC051142	cDNA sequence BC051142	1.671	Nucleus	other
BCHE	butyrylcholinesterase	-1.648	Plasma Membrane	enzyme
BCL11A	B-cell CLL/lymphoma 11A (zinc finger protein)	-2.143	Nucleus	transcription regulator
BCL7B	B-cell CLL/lymphoma 7B	1.883	Nucleus	other
BCLAF1	BCL2-associated transcription factor 1	-1.5	Nucleus	transcription regulator
BDNF	brain-derived neurotrophic factor	-1.591	Extracellular Space	growth factor
Bex1	brain expressed gene 1	1.724	Other	other
Bex6	brain expressed gene 6	-1.893	Cytoplasm	other
BMP2K	BMP2 inducible kinase	-1.519	Nucleus	kinase
BMPR2	bone morphogenetic protein receptor, type II (serine/threonine kinase)	1.766	Plasma Membrane	kinase
BTBD2	BTB (POZ) domain containing 2	1.65	Cytoplasm	other
C030005K15Rik	RIKEN cDNA C030005K15 gene	1.774	Other	other
C030007I01Rik	RIKEN cDNA C030007I01 gene	1.784	Other	other
C030013C21Rik	RIKEN cDNA C030013C21 gene	-1.982	Other	other
C030048H21Rik	RIKEN cDNA C030048H21 gene	1.55	Other	other
C10orf2	chromosome 10 open reading frame 2	-1.777	Cytoplasm	enzyme
C11orf97	chromosome 11 open reading frame 97	-1.505	Other	other
C14orf166	chromosome 14 open reading frame 166	-1.784	Nucleus	other
C16orf45	chromosome 16 open reading frame 45	1.738	Other	other
C16orf96	chromosome 16 open reading frame 96	-2.085	Other	other
C1orf109	chromosome 1 open reading frame 109	-1.621	Other	other
C1orf168	chromosome 1 open reading frame 168	-1.586	Other	other
C1orf216	chromosome 1 open reading frame 216	1.583	Other	other
C20orf194	chromosome 20 open reading frame 194	-1.602	Nucleus	other
C21orf91	chromosome 21 open reading frame 91	-1.529	Other	other
C6orf106	chromosome 6 open reading frame 106	1.855	Other	other
C9orf91	chromosome 9 open reading frame 91	1.974	Cytoplasm	other
CABIN1	calcineurin binding protein 1	1.52	Nucleus	other
CACNA1A	calcium channel, voltage-dependent, P/Q type, alpha 1A subunit	1.581	Plasma Membrane	ion channel
CACNA2D2	calcium channel, voltage-dependent, alpha 2/delta subunit 2	3.93	Plasma Membrane	ion channel
CACNB2	calcium channel, voltage-dependent, beta 2 subunit	1.737	Plasma Membrane	ion channel
CALB2	calbindin 2	-1.962	Cytoplasm	other
CAMK2B	calcium/calmodulin-dependent protein kinase II beta	1.696	Cytoplasm	kinase
CAP1	CAP, adenylate cyclase-associated protein 1 (yeast)	1.617	Plasma Membrane	other
CAT	catalase	1.898	Cytoplasm	enzyme
CAV2	caveolin 2	-1.741	Plasma Membrane	other
CBFB	core-binding factor, beta subunit	-1.691	Nucleus	transcription regulator
CBLN1	cerebellin 1 precursor	-2.062	Cytoplasm	other
CBY1	chibby homolog 1 (Drosophila)	1.595	Cytoplasm	other
CC2D2A	coiled-coil and C2 domain containing 2A	1.763	Cytoplasm	other
Ccdc24	coiled-coil domain containing 24	1.604	Other	other
Ccdc50	coiled-coil domain containing 50	-1.667	Cytoplasm	other
CCDC70	coiled-coil domain containing 70	-5.589	Plasma Membrane	other
CCDC28A	coiled-coil domain containing 28A	1.737	Other	other
CCNA1	cyclin A1	1.691	Nucleus	other
CCR5	chemokine (C-C motif) receptor 5 (gene/pseudogene)	-1.561	Plasma Membrane	G-protein coupled receptor
CCRN4L	CCR4 carbon catabolite repression 4-like (S. cerevisiae)	-1.774	Nucleus	transcription regulator
CD2	CD2 molecule	1.958	Plasma Membrane	transmembrane receptor
CD46	CD46 molecule, complement regulatory protein	2.384	Plasma Membrane	other
CD74	CD74 molecule, major histocompatibility complex, class II invariant chain	1.524	Plasma Membrane	transmembrane receptor
Cd209c	CD209c antigen	1.654	Plasma Membrane	other
CD3EAP	CD3e molecule, epsilon associated protein	1.824	Nucleus	other
CDC27	cell division cycle 27	1.644	Nucleus	other
CDC5L	cell division cycle 5-like	-1.511	Nucleus	other
CDHR1	cadherin-related family member 1	-4.231	Plasma Membrane	other
CDK14	cyclin-dependent kinase 14	1.592	Nucleus	kinase
CDKN2A	cyclin-dependent kinase inhibitor 2A	1.707	Nucleus	transcription regulator
CDV3	CDV3 homolog (mouse)	-1.878	Cytoplasm	other
Cep112os2	centrosomal protein 112, opposite strand 2	1.516	Other	other
CFH	complement factor H	-1.518	Extracellular Space	other
Cfhr2	complement factor H-related 2	-1.528	Other	other
CFL2	cofilin 2 (muscle)	-1.598	Extracellular Space	other
CHRM2	cholinergic receptor, muscarinic 2	2.136	Plasma Membrane	G-protein coupled receptor
CHRNA10	cholinergic receptor, nicotinic, alpha 10 (neuronal)	-2.027	Plasma Membrane	transmembrane receptor
CHST8	carbohydrate (N-acetylgalactosamine 4-0) sulfotransferase 8	-1.549	Cytoplasm	enzyme
CLCA1	chloride channel accessory 1	-2.042	Plasma Membrane	ion channel
CLCA2	chloride channel accessory 2	-1.885	Plasma Membrane	ion channel
CLDN4	claudin 4	-3.448	Plasma Membrane	transmembrane receptor
CLEC1A	C-type lectin domain family 1, member A	-1.531	Plasma Membrane	transmembrane receptor
CLEC1B	C-type lectin domain family 1, member B	1.737	Plasma Membrane	transmembrane receptor
CNN1	calponin 1, basic, smooth muscle	-2.228	Cytoplasm	other
CNTFR	ciliary neurotrophic factor receptor	2.119	Plasma Membrane	transmembrane receptor
COBL	cordon-bleu WH2 repeat protein	1.766	Plasma Membrane	other
COL23A1	collagen, type XXIII, alpha 1	-1.531	Plasma Membrane	other
COL25A1	collagen, type XXV, alpha 1	1.516	Cytoplasm	other
COMP	cartilage oligomeric matrix protein	-1.608	Extracellular Space	other
CPA6	carboxypeptidase A6	-1.498	Extracellular Space	peptidase
CPE	carboxypeptidase E	-1.555	Cytoplasm	peptidase
CPXM2	carboxypeptidase X (M14 family), member 2	-1.507	Extracellular Space	peptidase
CREB1	cAMP responsive element binding protein 1	-1.512	Nucleus	transcription regulator
CREBBP	CREB binding protein	1.549	Nucleus	transcription regulator
CRLF1	cytokine receptor-like factor 1	-1.508	Extracellular Space	other
CRP	C-reactive protein, pentraxin-related	-1.779	Extracellular Space	other
CRYBA1	crystallin, beta A1	1.516	Other	other
Cryge/Crygf	crystallin, gamma F	-1.582	Other	other
CSF2	colony stimulating factor 2 (granulocyte-macrophage)	-1.847	Extracellular Space	cytokine
CSNK1A1	casein kinase 1, alpha 1	1.668	Cytoplasm	kinase
CSNK1G2	casein kinase 1, gamma 2	1.529	Cytoplasm	kinase
CSTF1	cleavage stimulation factor, 3' pre-RNA, subunit 1, 50kDa	1.519	Nucleus	other
CTDNEP1	CTD nuclear envelope phosphatase 1	1.543	Extracellular Space	phosphatase
CTDSP1	CTD (carboxy-terminal domain, RNA polymerase II, polypeptide A) small phosphatase 1	1.51	Nucleus	phosphatase
CTNNAL1	catenin (cadherin-associated protein), alpha-like 1	1.573	Plasma Membrane	other
CTXN3	cortexin 3	-1.799	Other	other
CWC25	CWC25 spliceosome-associated protein homolog (S. cerevisiae)	-1.502	Other	other
CWF19L2	CWF19-like 2, cell cycle control (S. pombe)	-1.583	Other	other
CX3CR1	chemokine (C-X3-C motif) receptor 1	1.53	Plasma Membrane	G-protein coupled receptor
CXADR	coxsackie virus and adenovirus receptor	-1.707	Plasma Membrane	transmembrane receptor
CYFIP1	cytoplasmic FMR1 interacting protein 1	-1.52	Cytoplasm	other
CYP2F1	cytochrome P450, family 2, subfamily F, polypeptide 1	-2.111	Cytoplasm	enzyme
CYP2W1	cytochrome P450, family 2, subfamily W, polypeptide 1	1.719	Cytoplasm	enzyme
CYTL1	cytokine-like 1	-1.599	Extracellular Space	cytokine
D030018L15Rik	nuclear receptor coactivator 2 pseudogene	-2.147	Other	other
D11Ertd712e	DNA segment, Chr 11, ERATO Doi 712, expressed	1.699	Other	other
D930016D06Rik	RIKEN cDNA D930016D06 gene	-1.668	Other	other
D930028M14Rik	RIKEN cDNA D930028M14 gene	2.821	Other	other
DCAF6	DDB1 and CUL4 associated factor 6	1.581	Nucleus	transcription regulator
DCLRE1C	DNA cross-link repair 1C	1.655	Nucleus	enzyme
DCN	decorin	-1.715	Extracellular Space	other
DCX	doublecortin	-1.567	Cytoplasm	other
DDR2	discoidin domain receptor tyrosine kinase 2	-1.666	Plasma Membrane	kinase
DDX5	DEAD (Asp-Glu-Ala-Asp) box helicase 5	1.603	Nucleus	enzyme
DDX6	DEAD (Asp-Glu-Ala-Asp) box helicase 6	1.513	Nucleus	enzyme
DDX3X	DEAD (Asp-Glu-Ala-Asp) box helicase 3, X-linked	-1.83	Cytoplasm	enzyme
DECR2	2,4-dienoyl CoA reductase 2, peroxisomal	1.581	Cytoplasm	enzyme
Defa3 (includes others)	defensin, alpha, 3	2.37	Extracellular Space	other
Defb46	defensin beta 46	6.973	Other	other
DEGS2	delta(4)-desaturase, sphingolipid 2	-1.555	Cytoplasm	enzyme
DGCR2	DiGeorge syndrome critical region gene 2	-1.507	Plasma Membrane	other
DIAPH1	diaphanous-related formin 1	1.758	Plasma Membrane	other
DIRC2	disrupted in renal carcinoma 2	-1.686	Other	other
DIXDC1	DIX domain containing 1	1.651	Cytoplasm	other
Dleu2	deleted in lymphocytic leukemia, 2	-1.706	Other	other
DLG4	discs, large homolog 4 (Drosophila)	1.519	Plasma Membrane	kinase
DLK1	delta-like 1 homolog (Drosophila)	1.544	Extracellular Space	other
DLX2	distal-less homeobox 2	-1.681	Nucleus	transcription regulator
Dlx6os1	distal-less homeobox 6, opposite strand 1	-1.606	Nucleus	other
DNAJC2	DnaJ (Hsp40) homolog, subfamily C, member 2	1.584	Nucleus	other
DNAJC21	DnaJ (Hsp40) homolog, subfamily C, member 21	1.704	Other	other
DNAJC28	DnaJ (Hsp40) homolog, subfamily C, member 28	2.191	Other	other
DOK7	docking protein 7	-1.574	Extracellular Space	other
DPYD	dihydropyrimidine dehydrogenase	-1.575	Cytoplasm	enzyme
DSCC1	DNA replication and sister chromatid cohesion 1	-2.244	Nucleus	other
DUSP18	dual specificity phosphatase 18	1.797	Cytoplasm	phosphatase
DVL3	dishevelled segment polarity protein 3	2.398	Cytoplasm	other
E030018B13Rik	RIKEN cDNA E030018B13 gene	1.504	Other	other
E130106K03Rik	RIKEN cDNA E130106K03 gene	1.535	Other	other
E230025N22Rik	Riken cDNA E230025N22 gene	1.533	Other	other
E330020D12Rik	Riken cDNA E330020D12 gene	2.202	Other	other
EBF1	early B-cell factor 1	1.508	Nucleus	transcription regulator
ECE1	endothelin converting enzyme 1	1.59	Plasma Membrane	peptidase
Eci3	enoyl-Coenzyme A delta isomerase 3	1.633	Cytoplasm	enzyme
ECM2	extracellular matrix protein 2, female organ and adipocyte specific	-1.544	Extracellular Space	other
EDEM3	ER degradation enhancer, mannosidase alpha-like 3	-1.51	Cytoplasm	enzyme
EDN1	endothelin 1	-1.655	Extracellular Space	cytokine
EFHC1	EF-hand domain (C-terminal) containing 1	-1.498	Cytoplasm	other
EGF	epidermal growth factor	-1.548	Extracellular Space	growth factor
EGFL8	EGF-like-domain, multiple 8	1.727	Extracellular Space	other
EIF5	eukaryotic translation initiation factor 5	1.513	Cytoplasm	translation regulator
EIF3C	eukaryotic translation initiation factor 3, subunit C	1.817	Other	translation regulator
EIF4EBP2	eukaryotic translation initiation factor 4E binding protein 2	2.236	Cytoplasm	translation regulator
ELMO2	engulfment and cell motility 2	-1.601	Cytoplasm	other
EMILIN3	elastin microfibril interfacer 3	-1.493	Extracellular Space	other
EMP1	epithelial membrane protein 1	-1.797	Plasma Membrane	other
ENTPD8	ectonucleoside triphosphate diphosphohydrolase 8	-1.681	Other	enzyme
EOMES	eomesodermin	-2.991	Nucleus	transcription regulator
EP300	E1A binding protein p300	1.756	Nucleus	transcription regulator
EPN1	epsin 1	-1.537	Plasma Membrane	other
EPN3	epsin 3	1.503	Cytoplasm	other
ERC1	ELKS/RAB6-interacting/CAST family member 1	1.532	Cytoplasm	other
ETNK1	ethanolamine kinase 1	1.575	Cytoplasm	kinase
ETV1	ets variant 1	-1.561	Nucleus	transcription regulator
EXOC7	exocyst complex component 7	2.224	Cytoplasm	transporter
EZH1	enhancer of zeste 1 polycomb repressive complex 2 subunit	-1.532	Nucleus	enzyme
EZH2	enhancer of zeste 2 polycomb repressive complex 2 subunit	-1.496	Nucleus	transcription regulator
F420015M19Rik	RIKEN cDNA F420015M19 gene	1.968	Other	other
F630003A18Rik	RIKEN cDNA F630003A18 gene	2.23	Other	other
FABP7	fatty acid binding protein 7, brain	-1.534	Cytoplasm	transporter
FAF1	Fas (TNFRSF6) associated factor 1	-1.524	Nucleus	other
FAM101A/ZNF664-FAM101A	family with sequence similarity 101, member A	-1.608	Other	transporter
FAM120C	family with sequence similarity 120C	1.515	Other	other
FAM132B	family with sequence similarity 132, member B	-1.9	Extracellular Space	other
FAM133B	family with sequence similarity 133, member B	1.79	Other	other
FAM171B	family with sequence similarity 171, member B	-1.571	Other	other
FAM175B	family with sequence similarity 175, member B	1.755	Nucleus	other
FAM196B	family with sequence similarity 196, member B	-1.521	Other	other
FAM20C	family with sequence similarity 20, member C	-1.63	Extracellular Space	enzyme
FAM35A	family with sequence similarity 35, member A	1.515	Extracellular Space	other
FAR1	fatty acyl CoA reductase 1	-1.733	Cytoplasm	enzyme
FBXL6	F-box and leucine-rich repeat protein 6	1.584	Other	enzyme
FBXL18	F-box and leucine-rich repeat protein 18	1.759	Other	enzyme
FBXO10	F-box protein 10	-1.55	Cytoplasm	enzyme
FBXW7	F-box and WD repeat domain containing 7, E3 ubiquitin protein ligase	2.271	Nucleus	transcription regulator
Fbxw25	F-box and WD-40 domain protein 25	-1.726	Other	other
FETUB	fetuin B	2.006	Extracellular Space	other
FGF6	fibroblast growth factor 6	1.576	Extracellular Space	growth factor
FGF10	fibroblast growth factor 10	-1.563	Extracellular Space	growth factor
FGFR3	fibroblast growth factor receptor 3	-1.569	Plasma Membrane	kinase
FGFR1OP2	FGFR1 oncogene partner 2	1.7	Cytoplasm	other
FGL2	fibrinogen-like 2	-1.686	Extracellular Space	peptidase
FIBIN	fin bud initiation factor homolog (zebrafish)	-1.642	Cytoplasm	other
Fip1l1	FIP1 like 1 (S. cerevisiae)	1.73	Nucleus	other
FLRT1	fibronectin leucine rich transmembrane protein 1	1.513	Plasma Membrane	other
FLYWCH1	FLYWCH-type zinc finger 1	1.652	Other	other
FMN1	formin 1	1.801	Nucleus	other
FMN2	formin 2	1.767	Cytoplasm	other
FMNL3	formin-like 3	-1.567	Cytoplasm	other
FOLR1	folate receptor 1 (adult)	1.506	Plasma Membrane	transporter
FOS	FBJ murine osteosarcoma viral oncogene homolog	-1.998	Nucleus	transcription regulator
FOSL2	FOS-like antigen 2	-1.514	Nucleus	transcription regulator
FOXD3	forkhead box D3	-1.565	Nucleus	transcription regulator
FREM3	FRAS1 related extracellular matrix 3	-1.575	Extracellular Space	other
FRG1	FSHD region gene 1	1.665	Nucleus	transporter
FRMD7	FERM domain containing 7	-1.507	Plasma Membrane	other
FSIP1	fibrous sheath interacting protein 1	-1.859	Other	other
FTH1	ferritin, heavy polypeptide 1	-1.557	Cytoplasm	enzyme
Fxyd2	FXYD domain-containing ion transport regulator 2	1.503	Plasma Membrane	other
G2E3	G2/M-phase specific E3 ubiquitin protein ligase	1.658	Cytoplasm	other
GAA	glucosidase, alpha; acid	1.859	Cytoplasm	enzyme
GATAD2B	GATA zinc finger domain containing 2B	1.992	Nucleus	transcription regulator
GBE1	glucan (1,4-alpha-), branching enzyme 1	-1.596	Cytoplasm	enzyme
GCNT1	glucosaminyl (N-acetyl) transferase 1, core 2	-2.281	Cytoplasm	enzyme
GCNT2	glucosaminyl (N-acetyl) transferase 2, I-branching enzyme (I blood group)	1.512	Cytoplasm	enzyme
GDAP2	ganglioside induced differentiation associated protein 2	-1.5	Cytoplasm	other
GFRA4	GDNF family receptor alpha 4	1.831	Plasma Membrane	transmembrane receptor
GGA3	golgi-associated, gamma adaptin ear containing, ARF binding protein 3	-1.564	Cytoplasm	transporter
GIT2	G protein-coupled receptor kinase interacting ArfGAP 2	2.005	Nucleus	other
GJB2	gap junction protein, beta 2, 26kDa	-1.739	Plasma Membrane	transporter
GLTSCR1	glioma tumor suppressor candidate region gene 1	2.042	Extracellular Space	other
Gm829	predicted gene 829	-1.741	Other	other
Gm1943	WD repeat domain 70 pseudogene	-1.678	Other	other
Gm3772	predicted gene 3772	6.361	Other	other
Gm5124	nucleolar and coiled-body phosphoprotein 1 pseudogene	2.09	Other	other
Gm5176	high mobility group box 2 pseudogene	2.663	Other	other
Gm5396	predicted pseudogene 5396	2.484	Other	other
Gm5468	predicted gene 5468	1.741	Other	other
Gm5590	predicted gene 5590	1.794	Other	other
Gm6970	histone cluster 1, H1b pseudogene	1.531	Other	other
Gm7461	predicted gene 7461	3.23	Other	other
Gm9258	predicted gene 9258	-2.231	Other	other
Gm9706	predicted gene 9706	1.65	Other	other
Gm9736	predicted gene 9736	4.156	Other	other
Gm10088	ubiquitin-conjugating enzyme E2 pseudogene	2.53	Other	other
Gm10143	predicted gene 10143	-3.516	Other	other
Gm10451	predicted gene 10451	-1.497	Other	other
Gm10635	predicted gene 10635	-1.978	Other	other
Gm10729	predicted gene 10729	-3.477	Other	other
Gm10770	predicted gene 10770	2.781	Other	other
Gm10822	predicted gene 10822	-2.384	Other	other
Gm10854	predicted gene 10854	-1.756	Other	other
Gm11223	stathmin 1 pseudogene	-1.507	Other	other
Gm12603	predicted gene 12603	2.23	Other	other
Gm12618	predicted gene 12618	1.624	Other	other
Gm12789	predicted gene 12789	-1.626	Other	other
Gm13807	predicted gene 13807	2.344	Other	other
Gm14410	predicted gene 14410	-1.759	Other	other
Gm14418	novel KRAB box and zinc finger, C2H2 type domain containing protein	-1.513	Other	other
Gm15645	predicted gene 15645	-1.553	Other	other
Gm16485	predicted gene 16485	2.332	Other	other
Gm16489	predicted gene 16489	1.7	Other	other
Gm20749	zinc finger, MYND-type containing 8 pseudogene	1.767	Other	other
Gm32296	predicted gene, 32296	1.583	Other	other
Gm14459 (includes others)	synovial sarcoma, X member B, breakpoint 1	-3.34	Nucleus	other
Gm1527/Gm6558	predicted gene 1527	-3.162	Other	other
Gm15807/Hmgn5	high-mobility group nucleosome binding domain 5	2.258	Nucleus	other
Gm1604b	predicted gene 1604b	1.562	Other	other
Gm21596/Hmgb1	high mobility group box 1	2.585	Nucleus	transcription regulator
Gm318 (includes others)	predicted gene 318	2.881	Other	other
Gm7133 (includes others)	predicted gene 7133	2.753	Other	other
GMCL1	germ cell-less, spermatogenesis associated 1	1.585	Nucleus	other
GML	glycosylphosphatidylinositol anchored molecule like	4.405	Plasma Membrane	other
GNAL	guanine nucleotide binding protein (G protein), alpha activating activity polypeptide, olfactory type	1.94	Cytoplasm	enzyme
GNG4	guanine nucleotide binding protein (G protein), gamma 4	-1.988	Plasma Membrane	enzyme
GON4L	gon-4-like (C. elegans)	1.605	Cytoplasm	other
GPNMB	glycoprotein (transmembrane) nmb	-1.527	Plasma Membrane	enzyme
GPR6	G protein-coupled receptor 6	1.671	Plasma Membrane	G-protein coupled receptor
GPR26	G protein-coupled receptor 26	2.373	Plasma Membrane	G-protein coupled receptor
GPR88	G protein-coupled receptor 88	1.694	Plasma Membrane	G-protein coupled receptor
GPR160	G protein-coupled receptor 160	-1.52	Plasma Membrane	G-protein coupled receptor
GPRC5B	G protein-coupled receptor, class C, group 5, member B	1.596	Plasma Membrane	G-protein coupled receptor
GPRIN3	GPRIN family member 3	1.9	Other	other
GRIN2A	glutamate receptor, ionotropic, N-methyl D-aspartate 2A	1.601	Plasma Membrane	ion channel
GRM5	glutamate receptor, metabotropic 5	1.546	Plasma Membrane	G-protein coupled receptor
GRP	gastrin-releasing peptide	-1.622	Extracellular Space	growth factor
GTF3C5	general transcription factor IIIC, polypeptide 5, 63kDa	-1.507	Nucleus	transcription regulator
GUF1	GUF1 GTPase homolog (S. cerevisiae)	-1.683	Cytoplasm	other
HACL1	2-hydroxyacyl-CoA lyase 1	-1.511	Cytoplasm	enzyme
HAO2	hydroxyacid oxidase 2 (long chain)	9.432	Cytoplasm	enzyme
HAP1	huntingtin-associated protein 1	-1.574	Cytoplasm	other
HAS2	hyaluronan synthase 2	-2.232	Plasma Membrane	enzyme
HCRT	hypocretin (orexin) neuropeptide precursor	1.522	Extracellular Space	other
HDAC1	histone deacetylase 1	-1.734	Nucleus	transcription regulator
HDGF	hepatoma-derived growth factor	1.639	Extracellular Space	growth factor
HDX	highly divergent homeobox	1.953	Other	other
HECTD4	HECT domain containing E3 ubiquitin protein ligase 4	2.11	Nucleus	other
HEPACAM	hepatic and glial cell adhesion molecule	1.787	Plasma Membrane	other
Hist1h1b	histone cluster 1, H1b	1.801	Nucleus	other
HIST1H4F	histone cluster 1, H4f	1.507	Nucleus	other
HIVEP3	human immunodeficiency virus type I enhancer binding protein 3	1.529	Nucleus	transcription regulator
HK1	hexokinase 1	-1.727	Cytoplasm	kinase
HOMER1	homer scaffolding protein 1	1.907	Plasma Membrane	other
HOMEZ	homeobox and leucine zipper encoding	-1.526	Nucleus	transcription regulator
HOXB1	homeobox B1	-2.195	Nucleus	transcription regulator
HOXC4	homeobox C4	-1.602	Nucleus	transcription regulator
HPRT1	hypoxanthine phosphoribosyltransferase 1	-1.572	Cytoplasm	enzyme
HS3ST4	heparan sulfate (glucosamine) 3-O-sulfotransferase 4	4.388	Cytoplasm	enzyme
HS3ST6	heparan sulfate (glucosamine) 3-O-sulfotransferase 6	-2.041	Cytoplasm	enzyme
HSD3B1	hydroxy-delta-5-steroid dehydrogenase, 3 beta- and steroid delta-isomerase 1	1.573	Cytoplasm	enzyme
HSPA12A	heat shock 70kDa protein 12A	1.614	Cytoplasm	other
HTATSF1	HIV-1 Tat specific factor 1	2.701	Nucleus	transcription regulator
Htr5b	5-hydroxytryptamine (serotonin) receptor 5B	-1.578	Plasma Membrane	G-protein coupled receptor
IDS	iduronate 2-sulfatase	-1.493	Cytoplasm	enzyme
IER5	immediate early response 5	-1.744	Other	other
IFI30	interferon, gamma-inducible protein 30	1.736	Cytoplasm	enzyme
IFNA4	interferon, alpha 4	-1.506	Extracellular Space	cytokine
IGHA1	immunoglobulin heavy constant alpha 1	-1.598	Extracellular Space	other
Ighv8-12	immunoglobulin heavy variable V8-12	3.843	Other	other
IGKC	immunoglobulin kappa constant	-2.307	Extracellular Space	other
IKZF2	IKAROS family zinc finger 2 (Helios)	-1.612	Nucleus	transcription regulator
IL6	interleukin 6	2.071	Extracellular Space	cytokine
IL17RD	interleukin 17 receptor D	-1.57	Cytoplasm	other
IL1RN	interleukin 1 receptor antagonist	2.662	Extracellular Space	cytokine
ILF2	interleukin enhancer binding factor 2	1.655	Nucleus	transcription regulator
IMPACT	impact RWD domain protein	1.547	Other	other
INO80	INO80 complex subunit	1.695	Nucleus	enzyme
INO80B	INO80 complex subunit B	2.509	Nucleus	other
INPP5E	inositol polyphosphate-5-phosphatase, 72 kDa	1.557	Cytoplasm	phosphatase
ISL1	ISL LIM homeobox 1	1.54	Nucleus	transcription regulator
ITGA4	integrin, alpha 4 (antigen CD49D, alpha 4 subunit of VLA-4 receptor)	-1.578	Plasma Membrane	transmembrane receptor
ITGB8	integrin, beta 8	-1.503	Plasma Membrane	other
Itgb2l	integrin beta 2-like	-1.72	Plasma Membrane	other
ITM2A	integral membrane protein 2A	-1.632	Plasma Membrane	other
JAKMIP3	Janus kinase and microtubule interacting protein 3	1.637	Other	other
KAT2A	K(lysine) acetyltransferase 2A	1.775	Cytoplasm	enzyme
KAT2B	K(lysine) acetyltransferase 2B	-1.494	Nucleus	transcription regulator
KCNA2	potassium channel, voltage gated shaker related subfamily A, member 2	1.75	Plasma Membrane	ion channel
KCNC1	potassium channel, voltage gated Shaw related subfamily C, member 1	1.543	Plasma Membrane	ion channel
KCNC3	potassium channel, voltage gated Shaw related subfamily C, member 3	1.821	Plasma Membrane	ion channel
KCND3	potassium channel, voltage gated Shal related subfamily D, member 3	-1.52	Plasma Membrane	ion channel
KCNJ3	potassium channel, inwardly rectifying subfamily J, member 3	1.795	Plasma Membrane	ion channel
KCNK15	potassium channel, two pore domain subfamily K, member 15	-1.737	Plasma Membrane	ion channel
KCNRG	potassium channel regulator	-2.716	Cytoplasm	ion channel
KCTD2	potassium channel tetramerization domain containing 2	-1.689	Other	ion channel
KCTD8	potassium channel tetramerization domain containing 8	1.504	Other	other
KIAA0195	KIAA0195	1.575	Extracellular Space	other
KIAA1109	KIAA1109	-1.51	Other	other
KIAA2026	KIAA2026	1.568	Other	other
KIAA0226L	KIAA0226-like	2.326	Other	other
KIF6	kinesin family member 6	1.842	Nucleus	other
KIF5B	kinesin family member 5B	1.551	Cytoplasm	other
KITLG	KIT ligand	1.54	Extracellular Space	growth factor
KLHL22	kelch-like family member 22	2.054	Cytoplasm	other
KLK3	kallikrein-related peptidase 3	3.387	Extracellular Space	peptidase
KLK7	kallikrein-related peptidase 7	-3.325	Extracellular Space	peptidase
KPNA3	karyopherin alpha 3 (importin alpha 4)	2.698	Nucleus	transporter
KRT39	keratin 39, type I	-2.172	Cytoplasm	other
KRT222	keratin 222, type II	1.621	Other	other
KRTAP20-2	keratin associated protein 20-2	1.643	Other	other
KSR2	kinase suppressor of ras 2	1.59	Cytoplasm	kinase
LAMC2	laminin, gamma 2	-1.541	Extracellular Space	other
LAPTM5	lysosomal protein transmembrane 5	1.622	Plasma Membrane	other
LCA5L	Leber congenital amaurosis 5-like	-1.572	Extracellular Space	other
LCP1	lymphocyte cytosolic protein 1 (L-plastin)	-1.553	Cytoplasm	other
LEPR	leptin receptor	1.879	Plasma Membrane	transmembrane receptor
LGALS8	lectin, galactoside-binding, soluble, 8	-1.592	Extracellular Space	other
LGI2	leucine-rich repeat LGI family, member 2	1.729	Extracellular Space	other
LGR5	leucine-rich repeat containing G protein-coupled receptor 5	-1.564	Plasma Membrane	transmembrane receptor
LGR6	leucine-rich repeat containing G protein-coupled receptor 6	-2.023	Plasma Membrane	G-protein coupled receptor
LHX6	LIM homeobox 6	1.706	Nucleus	transcription regulator
LOC100130705	uncharacterized LOC100130705	-2.361	Other	other
LOC102640985	uncharacterized LOC102640985	1.546	Other	other
LOC102641638	high mobility group protein B1-like	2.416	Other	other
LONRF3	LON peptidase N-terminal domain and ring finger 3	-1.507	Other	other
LOXL3	lysyl oxidase-like 3	-1.519	Extracellular Space	enzyme
LRBA	LPS-responsive vesicle trafficking, beach and anchor containing	1.512	Cytoplasm	other
LRIG1	leucine-rich repeats and immunoglobulin-like domains 1	-1.846	Extracellular Space	other
LRRC2	leucine rich repeat containing 2	-1.512	Other	other
LRRC30	leucine rich repeat containing 30	-1.782	Other	other
LRRC49	leucine rich repeat containing 49	1.622	Other	other
LRRC10B	leucine rich repeat containing 10B	1.635	Other	other
LRRC8B	leucine rich repeat containing 8 family, member B	1.569	Other	other
LRTM1	leucine-rich repeats and transmembrane domains 1	-2.289	Other	other
LSAMP	limbic system-associated membrane protein	1.585	Plasma Membrane	other
LUM	lumican	-1.846	Extracellular Space	other
LYPD1	LY6/PLAUR domain containing 1	-1.541	Plasma Membrane	G-protein coupled receptor
LYPLAL1	lysophospholipase-like 1	1.828	Cytoplasm	enzyme
LYST	lysosomal trafficking regulator	1.526	Cytoplasm	transporter
LZTS1	leucine zipper, putative tumor suppressor 1	1.641	Nucleus	transcription regulator
MACROD2	MACRO domain containing 2	1.823	Nucleus	enzyme
MAGI3	membrane associated guanylate kinase, WW and PDZ domain containing 3	1.652	Cytoplasm	kinase
MAP2K4	mitogen-activated protein kinase kinase 4	2.096	Cytoplasm	kinase
MAP3K1	mitogen-activated protein kinase kinase kinase 1, E3 ubiquitin protein ligase	-1.651	Cytoplasm	kinase
MAP3K10	mitogen-activated protein kinase kinase kinase 10	1.633	Cytoplasm	kinase
MAPK6	mitogen-activated protein kinase 6	1.566	Cytoplasm	kinase
MARCH4	membrane-associated ring finger (C3HC4) 4, E3 ubiquitin protein ligase	-1.664	Cytoplasm	enzyme
MARK4	MAP/microtubule affinity-regulating kinase 4	1.809	Cytoplasm	kinase
MAS1	MAS1 proto-oncogene, G protein-coupled receptor	-1.524	Plasma Membrane	G-protein coupled receptor
MC3R	melanocortin 3 receptor	1.629	Plasma Membrane	G-protein coupled receptor
MCM6	minichromosome maintenance complex component 6	-1.576	Nucleus	enzyme
MDFIC	MyoD family inhibitor domain containing	-1.511	Nucleus	other
MEAF6	MYST/Esa1-associated factor 6	1.548	Nucleus	other
MED8	mediator complex subunit 8	-1.976	Nucleus	other
MED14	mediator complex subunit 14	-1.786	Nucleus	transcription regulator
MFSD6	major facilitator superfamily domain containing 6	1.629	Other	other
MFSD10	major facilitator superfamily domain containing 10	1.552	Other	transporter
MGEA5	meningioma expressed antigen 5 (hyaluronidase)	1.617	Cytoplasm	enzyme
MGST1	microsomal glutathione S-transferase 1	-1.539	Cytoplasm	enzyme
MICAL3	microtubule associated monooxygenase, calponin and LIM domain containing 3	1.873	Cytoplasm	enzyme
MMP27	matrix metallopeptidase 27	1.724	Cytoplasm	peptidase
MOGAT2	monoacylglycerol O-acyltransferase 2	-1.531	Cytoplasm	enzyme
MPP3	membrane protein, palmitoylated 3 (MAGUK p55 subfamily member 3)	1.607	Plasma Membrane	kinase
MPP7	membrane protein, palmitoylated 7 (MAGUK p55 subfamily member 7)	1.632	Plasma Membrane	other
Mrgpra5	MAS-related GPR, member A5	2.909	Other	other
MRPS25	mitochondrial ribosomal protein S25	1.721	Cytoplasm	other
MRPS26	mitochondrial ribosomal protein S26	-1.501	Cytoplasm	other
MRVI1	murine retrovirus integration site 1 homolog	-1.615	Cytoplasm	other
MS4A15	membrane-spanning 4-domains, subfamily A, member 15	-9.156	Other	other
MST1R	macrophage stimulating 1 receptor	-2.148	Plasma Membrane	kinase
MTNR1A	melatonin receptor 1A	-1.776	Plasma Membrane	G-protein coupled receptor
MYC	v-myc avian myelocytomatosis viral oncogene homolog	-1.654	Nucleus	transcription regulator
MYT1L	myelin transcription factor 1-like	1.729	Nucleus	transcription regulator
MZT1	mitotic spindle organizing protein 1	-1.623	Cytoplasm	other
NAA50	N(alpha)-acetyltransferase 50, NatE catalytic subunit	-1.498	Cytoplasm	enzyme
NALCN	sodium leak channel, non selective	1.653	Plasma Membrane	ion channel
NCAM2	neural cell adhesion molecule 2	2.561	Plasma Membrane	other
NDC80	NDC80 kinetochore complex component	1.722	Nucleus	other
NEGR1	neuronal growth regulator 1	1.559	Plasma Membrane	other
NELL2	NEL-like 2 (chicken)	2.53	Extracellular Space	other
NETO1	neuropilin (NRP) and tolloid (TLL)-like 1	1.51	Extracellular Space	other
NF2	neurofibromin 2 (merlin)	-1.517	Plasma Membrane	other
NFASC	neurofascin	1.682	Plasma Membrane	other
NFE2L3	nuclear factor, erythroid 2-like 3	1.622	Nucleus	transcription regulator
NHLRC3	NHL repeat containing 3	1.577	Cytoplasm	other
NIPAL4	NIPA-like domain containing 4	-1.774	Other	other
NMB	neuromedin B	-2.164	Extracellular Space	other
NOL9	nucleolar protein 9	1.601	Nucleus	other
Nos1ap	nitric oxide synthase 1 (neuronal) adaptor protein	1.677	Cytoplasm	other
NPHP1	nephronophthisis 1 (juvenile)	1.648	Nucleus	other
NPRL3	nitrogen permease regulator-like 3 (S. cerevisiae)	-2.257	Other	other
NR1I3	nuclear receptor subfamily 1, group I, member 3	2.38	Nucleus	ligand-dependent nuclear receptor
NR2F2	nuclear receptor subfamily 2, group F, member 2	-1.62	Nucleus	ligand-dependent nuclear receptor
NR4A1	nuclear receptor subfamily 4, group A, member 1	-1.749	Nucleus	ligand-dependent nuclear receptor
NRN1	neuritin 1	1.512	Cytoplasm	other
NSD1	nuclear receptor binding SET domain protein 1	1.745	Nucleus	transcription regulator
NSUN6	NOP2/Sun domain family, member 6	-1.526	Other	enzyme
NT5E	5'-nucleotidase, ecto (CD73)	-1.535	Plasma Membrane	phosphatase
NTNG1	netrin G1	-1.542	Extracellular Space	other
NUDCD1	NudC domain containing 1	-1.776	Nucleus	other
NUFIP2	nuclear fragile X mental retardation protein interacting protein 2	2.768	Cytoplasm	other
ODF2	outer dense fiber of sperm tails 2	-1.578	Cytoplasm	other
OGN	osteoglycin	-1.797	Extracellular Space	growth factor
Olfr53	olfactory receptor 53	2.965	Plasma Membrane	G-protein coupled receptor
Olfr148	olfactory receptor 148	1.672	Plasma Membrane	G-protein coupled receptor
Olfr392	olfactory receptor 392	-1.832	Plasma Membrane	G-protein coupled receptor
Olfr893	olfactory receptor 893	1.833	Plasma Membrane	G-protein coupled receptor
Olfr963	olfactory receptor 963	-1.526	Plasma Membrane	G-protein coupled receptor
Olfr1140	olfactory receptor 1140	-4.916	Plasma Membrane	G-protein coupled receptor
Olfr1164	olfactory receptor 1164	-3.58	Plasma Membrane	G-protein coupled receptor
Olfr1214	olfactory receptor 1214	1.565	Plasma Membrane	G-protein coupled receptor
Olfr1302	olfactory receptor 1302	3.858	Plasma Membrane	G-protein coupled receptor
Olfr1340	olfactory receptor 1340	1.845	Plasma Membrane	G-protein coupled receptor
Olfr1202/Olfr1204	olfactory receptor 1204	2.764	Plasma Membrane	G-protein coupled receptor
Olfr136/Olfr138	olfactory receptor 138	1.637	Plasma Membrane	G-protein coupled receptor
Olfr290/Olfr291	olfactory receptor 290	-4.132	Plasma Membrane	G-protein coupled receptor
Olfr911-ps1	olfactory receptor 911, pseudogene 1	2.456	Plasma Membrane	G-protein coupled receptor
OMD	osteomodulin	-1.692	Extracellular Space	other
OPCML	opioid binding protein/cell adhesion molecule-like	1.66	Plasma Membrane	other
OPRK1	opioid receptor, kappa 1	1.852	Plasma Membrane	G-protein coupled receptor
OPRM1	opioid receptor, mu 1	1.576	Plasma Membrane	G-protein coupled receptor
OR2T6	olfactory receptor, family 2, subfamily T, member 6	-1.496	Plasma Membrane	G-protein coupled receptor
OR2Y1	olfactory receptor, family 2, subfamily Y, member 1	4.272	Plasma Membrane	G-protein coupled receptor
OR51T1	olfactory receptor, family 51, subfamily T, member 1	-2.345	Plasma Membrane	G-protein coupled receptor
OR56A3	olfactory receptor, family 56, subfamily A, member 3	1.555	Plasma Membrane	G-protein coupled receptor
OR7G3	olfactory receptor, family 7, subfamily G, member 3	-4.767	Plasma Membrane	G-protein coupled receptor
OR9Q1	olfactory receptor, family 9, subfamily Q, member 1	1.742	Plasma Membrane	G-protein coupled receptor
OSBPL6	oxysterol binding protein-like 6	1.549	Cytoplasm	other
OSTM1	osteopetrosis associated transmembrane protein 1	4.301	Cytoplasm	other
P2RX3	purinergic receptor P2X, ligand gated ion channel, 3	-2.224	Plasma Membrane	ion channel
PA2G4	proliferation-associated 2G4, 38kDa	2.367	Nucleus	transcription regulator
PARD3	par-3 family cell polarity regulator	1.814	Plasma Membrane	other
PARVG	parvin, gamma	1.56	Cytoplasm	other
PBX1	pre-B-cell leukemia homeobox 1	1.7	Nucleus	transcription regulator
PCDH18	protocadherin 18	-1.516	Extracellular Space	other
PCDHGA9	protocadherin gamma subfamily A, 9	1.907	Other	other
PDE1A	phosphodiesterase 1A, calmodulin-dependent	1.783	Cytoplasm	enzyme
PDE3B	phosphodiesterase 3B, cGMP-inhibited	1.651	Cytoplasm	enzyme
PDE4A	phosphodiesterase 4A, cAMP-specific	1.682	Cytoplasm	enzyme
PDE5A	phosphodiesterase 5A, cGMP-specific	-2.698	Cytoplasm	enzyme
PDIK1L	PDLIM1 interacting kinase 1 like	1.505	Nucleus	kinase
Pdlim3	PDZ and LIM domain 3	-1.499	Plasma Membrane	other
PDZD2	PDZ domain containing 2	1.771	Plasma Membrane	other
PDZRN3	PDZ domain containing ring finger 3	1.754	Extracellular Space	enzyme
PEG3	paternally expressed 3	2.623	Nucleus	kinase
PFDN1	prefoldin subunit 1	1.975	Cytoplasm	transcription regulator
PFN1	profilin 1	1.592	Cytoplasm	other
Pgap2	post-GPI attachment to proteins 2	2.007	Cytoplasm	transporter
PGAP3	post-GPI attachment to proteins 3	1.521	Cytoplasm	enzyme
PHACTR2	phosphatase and actin regulator 2	1.563	Other	other
PHLDB2	pleckstrin homology-like domain, family B, member 2	-1.757	Cytoplasm	other
PICK1	protein interacting with PRKCA 1	1.623	Cytoplasm	enzyme
PIF1	PIF1 5'-to-3' DNA helicase	1.985	Nucleus	enzyme
PINK1	PTEN induced putative kinase 1	-1.678	Cytoplasm	kinase
PIP4K2A	phosphatidylinositol-5-phosphate 4-kinase, type II, alpha	1.772	Cytoplasm	kinase
Pisd-ps2	phosphatidylserine decarboxylase, pseudogene 2	1.764	Other	other
Pitpnc1	phosphatidylinositol transfer protein, cytoplasmic 1	1.598	Cytoplasm	transporter
PLCB1	phospholipase C, beta 1 (phosphoinositide-specific)	1.673	Cytoplasm	enzyme
PLCB4	phospholipase C, beta 4	2.394	Cytoplasm	enzyme
PLCH2	phospholipase C, eta 2	1.577	Cytoplasm	enzyme
PNMAL2	paraneoplastic Ma antigen family-like 2	1.854	Other	other
PNP	purine nucleoside phosphorylase	-1.61	Nucleus	enzyme
POFUT1	protein O-fucosyltransferase 1	-3.096	Cytoplasm	enzyme
POLR1B	polymerase (RNA) I polypeptide B, 128kDa	-1.999	Nucleus	enzyme
POU3F2	POU class 3 homeobox 2	2.387	Nucleus	transcription regulator
Pou6f2	POU domain, class 6, transcription factor 2	1.662	Nucleus	other
PPM1J	protein phosphatase, Mg2+/Mn2+ dependent, 1J	-1.673	Other	phosphatase
PPM1M	protein phosphatase, Mg2+/Mn2+ dependent, 1M	-5.427	Nucleus	phosphatase
PPP1R8	protein phosphatase 1, regulatory subunit 8	1.506	Nucleus	phosphatase
Ppp1r12b	protein phosphatase 1, regulatory (inhibitor) subunit 12B	1.914	Cytoplasm	other
PPP1R1B	protein phosphatase 1, regulatory (inhibitor) subunit 1B	1.677	Cytoplasm	phosphatase
PPP2R2B	protein phosphatase 2, regulatory subunit B, beta	1.632	Cytoplasm	phosphatase
PPP6R1	protein phosphatase 6, regulatory subunit 1	1.884	Cytoplasm	other
PRKAR2A	protein kinase, cAMP-dependent, regulatory, type II, alpha	-4.043	Cytoplasm	kinase
PRKD3	protein kinase D3	-1.539	Nucleus	kinase
PRKX	protein kinase, X-linked	1.922	Cytoplasm	kinase
PRPF38B	pre-mRNA processing factor 38B	2.205	Other	other
PRPF40B	PRP40 pre-mRNA processing factor 40 homolog B (S. cerevisiae)	1.89	Nucleus	other
PRPS1L1	phosphoribosyl pyrophosphate synthetase 1-like 1	1.691	Other	kinase
PRRX1	paired related homeobox 1	-2.38	Nucleus	transcription regulator
PSME4	proteasome (prosome, macropain) activator subunit 4	1.523	Cytoplasm	other
PTCH1	patched 1	1.754	Plasma Membrane	transmembrane receptor
PTGS2	prostaglandin-endoperoxide synthase 2 (prostaglandin G/H synthase and cyclooxygenase)	-1.813	Cytoplasm	enzyme
PTK7	protein tyrosine kinase 7 (inactive)	1.883	Plasma Membrane	kinase
Ptma (includes others)	prothymosin alpha	2.154	Nucleus	other
PTN	pleiotrophin	2.03	Extracellular Space	growth factor
PTPN5	protein tyrosine phosphatase, non-receptor type 5 (striatum-enriched)	1.662	Plasma Membrane	phosphatase
PTPN7	protein tyrosine phosphatase, non-receptor type 7	1.611	Cytoplasm	phosphatase
PTPRN2	protein tyrosine phosphatase, receptor type, N polypeptide 2	1.996	Plasma Membrane	phosphatase
PTPRO	protein tyrosine phosphatase, receptor type, O	-1.624	Plasma Membrane	phosphatase
PTPRS	protein tyrosine phosphatase, receptor type, S	1.532	Plasma Membrane	phosphatase
Ptprv	protein tyrosine phosphatase, receptor type, V	-2.858	Other	other
PTRF	polymerase I and transcript release factor	-1.5	Nucleus	transcription regulator
RAB37	RAB37, member RAS oncogene family	-1.886	Cytoplasm	enzyme
RAB33B	RAB33B, member RAS oncogene family	-1.661	Cytoplasm	enzyme
RALGPS2	Ral GEF with PH domain and SH3 binding motif 2	1.737	Other	other
RARB	retinoic acid receptor, beta	1.524	Nucleus	ligand-dependent nuclear receptor
RASD2	RASD family, member 2	1.528	Cytoplasm	enzyme
RBBP8NL	RBBP8 N-terminal like	-4.706	Extracellular Space	other
RBM20	RNA binding motif protein 20	3.252	Nucleus	other
RBM39	RNA binding motif protein 39	-1.666	Nucleus	transcription regulator
RCBTB1	regulator of chromosome condensation (RCC1) and BTB (POZ) domain containing protein 1	1.543	Nucleus	other
RD3	retinal degeneration 3	-2.027	Other	other
REM2	RAS (RAD and GEM)-like GTP binding 2	1.648	Plasma Membrane	enzyme
RERGL	RERG/RAS-like	2.246	Other	other
REXO1	REX1, RNA exonuclease 1 homolog (S. cerevisiae)	2.287	Nucleus	transcription regulator
RFC3	replication factor C (activator 1) 3, 38kDa	-1.555	Nucleus	enzyme
RFX3	regulatory factor X, 3 (influences HLA class II expression)	-1.605	Nucleus	transcription regulator
RGS4	regulator of G-protein signaling 4	1.683	Cytoplasm	other
RGS7BP	regulator of G-protein signaling 7 binding protein	1.791	Cytoplasm	other
RHBDD1	rhomboid domain containing 1	2.044	Extracellular Space	peptidase
RHCG	Rh family, C glycoprotein	-1.73	Plasma Membrane	transporter
Rhox3a (includes others)	reproductive homeobox 3A	1.603	Other	other
RIF1	replication timing regulatory factor 1	-1.706	Nucleus	other
RIMS1	regulating synaptic membrane exocytosis 1	2.936	Plasma Membrane	other
RMRP	RNA component of mitochondrial RNA processing endoribonuclease	2.279	Cytoplasm	other
RNASEH2A	ribonuclease H2, subunit A	1.588	Nucleus	enzyme
RNF150	ring finger protein 150	1.54	Other	peptidase
RNF214	ring finger protein 214	1.515	Other	other
RNPS1	RNA binding protein S1, serine-rich domain	-1.605	Nucleus	other
RNU12	RNA, U12 small nuclear	1.881	Nucleus	other
ROR2	receptor tyrosine kinase-like orphan receptor 2	-1.551	Plasma Membrane	kinase
Rrp1	ribosomal RNA processing 1 homolog (S. cerevisiae)	2.393	Nucleus	other
RRP12	ribosomal RNA processing 12 homolog (S. cerevisiae)	1.646	Nucleus	other
RRP1B	ribosomal RNA processing 1B	1.928	Nucleus	other
RSRC1	arginine/serine-rich coiled-coil 1	1.7	Nucleus	other
RTP2	receptor (chemosensory) transporter protein 2	1.577	Plasma Membrane	other
RUFY2	RUN and FYVE domain containing 2	1.783	Nucleus	other
RUFY4	RUN and FYVE domain containing 4	-2.272	Other	other
S100A5	S100 calcium binding protein A5	-6.767	Nucleus	other
S1PR2	sphingosine-1-phosphate receptor 2	-1.504	Plasma Membrane	G-protein coupled receptor
SCGB1A1	secretoglobin, family 1A, member 1 (uteroglobin)	1.58	Extracellular Space	cytokine
SCGN	secretagogin, EF-hand calcium binding protein	-1.884	Cytoplasm	other
Scml2	sex comb on midleg-like 2 (Drosophila)	-1.654	Other	other
SCN4B	sodium channel, voltage gated, type IV beta subunit	1.505	Plasma Membrane	ion channel
SCTR	secretin receptor	-1.617	Plasma Membrane	G-protein coupled receptor
SDF4	stromal cell derived factor 4	1.582	Cytoplasm	other
SEC14L3	SEC14-like 3 (S. cerevisiae)	1.627	Extracellular Space	transporter
SECISBP2L	SECIS binding protein 2-like	1.628	Other	other
Sel1l2	sel-1 suppressor of lin-12-like 2 (C. elegans)	-1.627	Other	other
SELE	selectin E	-1.815	Plasma Membrane	transmembrane receptor
SELP	selectin P (granule membrane protein 140kDa, antigen CD62)	2.863	Plasma Membrane	transmembrane receptor
SEMA3C	sema domain, immunoglobulin domain (Ig), short basic domain, secreted, (semaphorin) 3C	-1.576	Extracellular Space	other
SEMA5B	sema domain, seven thrombospondin repeats (type 1 and type 1-like), transmembrane domain (TM) and short cytoplasmic domain, (semaphorin) 5B	-1.56	Plasma Membrane	other
SENP7	SUMO1/sentrin specific peptidase 7	2.239	Nucleus	peptidase
SERPINA9	serpin peptidase inhibitor, clade A (alpha-1 antiproteinase, antitrypsin), member 9	2.322	Extracellular Space	other
Serpinb1c	serine (or cysteine) peptidase inhibitor, clade B, member 1c	-3.305	Extracellular Space	other
SERPINF1	serpin peptidase inhibitor, clade F (alpha-2 antiplasmin, pigment epithelium derived factor), member 1	-1.523	Extracellular Space	other
SESN2	sestrin 2	1.65	Cytoplasm	other
SETD8	SET domain containing (lysine methyltransferase) 8	1.642	Nucleus	enzyme
SEZ6L	seizure related 6 homolog (mouse)-like	1.533	Plasma Membrane	other
SH2B2	SH2B adaptor protein 2	-1.612	Cytoplasm	other
SH3BGRL2	SH3 domain binding glutamate-rich protein like 2	1.568	Nucleus	other
SH3RF2	SH3 domain containing ring finger 2	1.838	Extracellular Space	other
SHISA3	shisa family member 3	-1.574	Other	other
SHISA8	shisa family member 8	-2.106	Other	other
SIRT4	sirtuin 4	-1.915	Cytoplasm	enzyme
SIX1	SIX homeobox 1	-2.706	Nucleus	transcription regulator
SLC13A4	solute carrier family 13 (sodium/sulfate symporter), member 4	-1.51	Plasma Membrane	transporter
SLC16A14	solute carrier family 16, member 14	1.71	Other	other
SLC22A2	solute carrier family 22 (organic cation transporter), member 2	-1.816	Plasma Membrane	transporter
SLC22A15	solute carrier family 22, member 15	-1.504	Other	transporter
SLC23A3	solute carrier family 23, member 3	-1.863	Other	transporter
SLC24A4	solute carrier family 24 (sodium/potassium/calcium exchanger), member 4	1.676	Plasma Membrane	transporter
SLC25A5	solute carrier family 25 (mitochondrial carrier; adenine nucleotide translocator), member 5	1.594	Cytoplasm	transporter
SLC26A4	solute carrier family 26 (anion exchanger), member 4	-1.507	Plasma Membrane	transporter
SLC29A1	solute carrier family 29 (equilibrative nucleoside transporter), member 1	1.566	Plasma Membrane	transporter
SLC2A4	solute carrier family 2 (facilitated glucose transporter), member 4	-1.509	Plasma Membrane	transporter
SLC31A2	solute carrier family 31 (copper transporter), member 2	2.226	Plasma Membrane	transporter
SLC35E2B	solute carrier family 35, member E2B	1.565	Other	other
SLC3A1	solute carrier family 3 (amino acid transporter heavy chain), member 1	1.666	Plasma Membrane	transporter
SLC45A4	solute carrier family 45, member 4	2.019	Other	other
SLC7A11	solute carrier family 7 (anionic amino acid transporter light chain, xc- system), member 11	-2.278	Plasma Membrane	transporter
SLC8A3	solute carrier family 8 (sodium/calcium exchanger), member 3	1.864	Plasma Membrane	transporter
SLFN13	schlafen family member 13	1.509	Nucleus	enzyme
SMAD6	SMAD family member 6	-1.507	Nucleus	transcription regulator
SMARCD1	SWI/SNF related, matrix associated, actin dependent regulator of chromatin, subfamily d, member 1	1.817	Nucleus	transcription regulator
SNAP23	synaptosomal-associated protein, 23kDa	1.736	Plasma Membrane	transporter
SND1	staphylococcal nuclease and tudor domain containing 1	1.669	Nucleus	enzyme
Snora47	small nucleolar RNA, H/ACA box 47	1.614	Other	other
SNX31	sorting nexin 31	1.998	Other	other
SORCS1	sortilin-related VPS10 domain containing receptor 1	1.893	Plasma Membrane	transporter
SOX1	SRY (sex determining region Y)-box 1	1.652	Nucleus	transcription regulator
SP8	Sp8 transcription factor	-3.148	Nucleus	other
SP140	SP140 nuclear body protein	1.725	Nucleus	transcription regulator
SPARCL1	SPARC-like 1 (hevin)	-1.604	Extracellular Space	other
SPCS2	signal peptidase complex subunit 2 homolog (S. cerevisiae)	1.547	Cytoplasm	other
SPOP	speckle-type POZ protein	1.757	Extracellular Space	other
SRP54	signal recognition particle 54kDa	1.613	Cytoplasm	other
SRSF11	serine/arginine-rich splicing factor 11	3.145	Nucleus	other
SSX4/SSX4B	synovial sarcoma, X breakpoint 4	3.851	Nucleus	other
ST3GAL2	ST3 beta-galactoside alpha-2,3-sialyltransferase 2	-1.51	Cytoplasm	enzyme
ST6GALNAC5	ST6 (alpha-N-acetyl-neuraminyl-2,3-beta-galactosyl-1,3)-N-acetylgalactosaminide alpha-2,6-sialyltransferase 5	-1.624	Cytoplasm	enzyme
ST8SIA3	ST8 alpha-N-acetyl-neuraminide alpha-2,8-sialyltransferase 3	1.594	Cytoplasm	enzyme
STAU2	staufen double-stranded RNA binding protein 2	1.502	Cytoplasm	other
STEAP2	STEAP family member 2, metalloreductase	-1.894	Plasma Membrane	transporter
STMN1	stathmin 1	-1.754	Cytoplasm	other
STRC	stereocilin	3.747	Extracellular Space	other
STX2	syntaxin 2	-1.533	Cytoplasm	transporter
SYF2	SYF2 pre-mRNA-splicing factor	1.956	Nucleus	other
SYNE1	spectrin repeat containing, nuclear envelope 1	1.791	Nucleus	other
SYNE2	spectrin repeat containing, nuclear envelope 2	1.626	Nucleus	other
SYNM	synemin, intermediate filament protein	1.687	Cytoplasm	other
SYNPO2	synaptopodin 2	-1.526	Cytoplasm	other
SYT2	synaptotagmin II	1.628	Cytoplasm	transporter
SYT6	synaptotagmin VI	2.429	Cytoplasm	transporter
SYTL1	synaptotagmin-like 1	1.539	Cytoplasm	enzyme
TACR2	tachykinin receptor 2	1.553	Plasma Membrane	G-protein coupled receptor
TAF3	TAF3 RNA polymerase II, TATA box binding protein (TBP)-associated factor, 140kDa	1.549	Nucleus	transcription regulator
TBC1D16	TBC1 domain family, member 16	2.672	Extracellular Space	other
TBL1X	transducin (beta)-like 1X-linked	1.9	Nucleus	transcription regulator
TBX6	T-box 6	2.401	Nucleus	transcription regulator
TBX21	T-box 21	-3.035	Nucleus	transcription regulator
TCF3	transcription factor 3	1.577	Nucleus	transcription regulator
TCF4	transcription factor 4	1.552	Nucleus	transcription regulator
TCF12	transcription factor 12	1.892	Nucleus	transcription regulator
TCHHL1	trichohyalin-like 1	-1.495	Other	other
TEC	tec protein tyrosine kinase	-1.553	Cytoplasm	kinase
TEK	TEK tyrosine kinase, endothelial	-1.613	Plasma Membrane	kinase
TEKT1	tektin 1	-1.6	Cytoplasm	other
TES	testin LIM domain protein	-1.586	Plasma Membrane	other
TEX12	testis expressed 12	1.781	Nucleus	other
TGFBR1	transforming growth factor, beta receptor 1	-1.587	Plasma Membrane	kinase
TH	tyrosine hydroxylase	-2.043	Cytoplasm	enzyme
THBD	thrombomodulin	-1.662	Plasma Membrane	transmembrane receptor
THOC1	THO complex 1	-1.534	Nucleus	transcription regulator
THRAP3	thyroid hormone receptor associated protein 3	1.642	Nucleus	transcription regulator
THSD7B	thrombospondin, type I, domain containing 7B	-1.597	Other	other
TIA1	TIA1 cytotoxic granule-associated RNA binding protein	-1.97	Nucleus	other
TIMM9	translocase of inner mitochondrial membrane 9 homolog (yeast)	-1.66	Cytoplasm	transporter
TIMP1	TIMP metallopeptidase inhibitor 1	-1.83	Extracellular Space	cytokine
TLL1	tolloid-like 1	1.665	Extracellular Space	peptidase
TMEM135	transmembrane protein 135	-1.57	Cytoplasm	other
TMEM212	transmembrane protein 212	-1.575	Other	other
Tmem181b-ps	transmembrane protein 181B, pseudogene	1.639	Other	other
TMEM8C	transmembrane protein 8C	1.528	Plasma Membrane	other
TMPRSS11D	transmembrane protease, serine 11D	1.587	Extracellular Space	peptidase
TNNC1	troponin C type 1 (slow)	1.695	Cytoplasm	other
TNR	tenascin R	1.655	Plasma Membrane	other
TNRC18	trinucleotide repeat containing 18	-1.532	Nucleus	other
TOX3	TOX high mobility group box family member 3	-1.59	Other	other
TP63	tumor protein p63	1.69	Nucleus	transcription regulator
TPH1	tryptophan hydroxylase 1	-1.603	Nucleus	enzyme
TPM3	tropomyosin 3	1.53	Cytoplasm	other
TRDMT1	tRNA aspartic acid methyltransferase 1	-1.576	Nucleus	enzyme
TRDN	triadin	-1.672	Cytoplasm	other
TRHR	thyrotropin-releasing hormone receptor	-1.494	Plasma Membrane	G-protein coupled receptor
TRIM25	tripartite motif containing 25	-1.529	Cytoplasm	transcription regulator
TRIM68	tripartite motif containing 68	1.612	Cytoplasm	enzyme
TRIP11	thyroid hormone receptor interactor 11	1.82	Cytoplasm	transcription regulator
TRO	trophinin	-1.561	Plasma Membrane	other
TSHZ2	teashirt zinc finger homeobox 2	-2.122	Other	other
TSPAN18	tetraspanin 18	-1.623	Other	other
TSPO2	translocator protein 2	1.527	Cytoplasm	other
TSPYL1	TSPY-like 1	-1.533	Nucleus	other
TTC16	tetratricopeptide repeat domain 16	1.522	Other	other
TTC19	tetratricopeptide repeat domain 19	-1.668	Cytoplasm	other
TTC27	tetratricopeptide repeat domain 27	-1.507	Other	other
TTC39C	tetratricopeptide repeat domain 39C	-1.56	Other	other
TTC7A	tetratricopeptide repeat domain 7A	1.547	Plasma Membrane	other
TTI1	TELO2 interacting protein 1	-1.586	Cytoplasm	other
TTLL1	tubulin tyrosine ligase-like family member 1	-1.62	Extracellular Space	enzyme
TTLL7	tubulin tyrosine ligase-like family member 7	-1.498	Plasma Membrane	other
TTR	transthyretin	2.741	Extracellular Space	transporter
TUBA1B	tubulin, alpha 1b	-1.499	Cytoplasm	other
TUBB3	tubulin, beta 3 class III	1.557	Cytoplasm	other
TUBB6	tubulin, beta 6 class V	-1.734	Cytoplasm	other
TXLNA	taxilin alpha	2.093	Extracellular Space	cytokine
TXNIP	thioredoxin interacting protein	-2.05	Cytoplasm	other
UACA	uveal autoantigen with coiled-coil domains and ankyrin repeats	-1.813	Cytoplasm	other
UBE2J1	ubiquitin-conjugating enzyme E2, J1	-1.493	Cytoplasm	enzyme
UBE2M	ubiquitin-conjugating enzyme E2M	1.593	Cytoplasm	enzyme
UFM1	ubiquitin-fold modifier 1	-1.598	Cytoplasm	other
UNC13C	unc-13 homolog C (C. elegans)	2.553	Cytoplasm	other
USP19	ubiquitin specific peptidase 19	-1.691	Cytoplasm	peptidase
USP34	ubiquitin specific peptidase 34	1.67	Extracellular Space	peptidase
USP36	ubiquitin specific peptidase 36	1.804	Nucleus	peptidase
USP48	ubiquitin specific peptidase 48	1.642	Plasma Membrane	peptidase
UTP14A	UTP14, U3 small nucleolar ribonucleoprotein, homolog A (yeast)	1.8	Nucleus	other
UTRN	utrophin	-6.303	Plasma Membrane	transmembrane receptor
VAMP3	vesicle-associated membrane protein 3	-1.588	Plasma Membrane	other
VDR	vitamin D (1,25- dihydroxyvitamin D3) receptor	1.531	Nucleus	transcription regulator
VIPR2	vasoactive intestinal peptide receptor 2	-4.184	Plasma Membrane	G-protein coupled receptor
Vmn1r15	vomeronasal 1 receptor 15	4.129	Other	other
Vmn1r233	vomeronasal 1 receptor 233	3.536	Plasma Membrane	G-protein coupled receptor
Vmn1r-ps79	vomeronasal 1 receptor, pseudogene 79	-1.883	Other	other
Vmn1r63 (includes others)	vomeronasal 1 receptor 63	2.682	Other	other
Vmn2r27	vomeronasal 2, receptor27	1.501	Other	other
Vmn2r108 (includes others)	vomeronasal 2, receptor 110	-1.658	Other	other
Vmn2r81 (includes others)	vomeronasal 2, receptor 81	-2.441	Cytoplasm	other
VPS13C	vacuolar protein sorting 13 homolog C (S. cerevisiae)	-1.505	Cytoplasm	other
VWF	von Willebrand factor	-1.536	Extracellular Space	other
Wap	whey acidic protein	-2.55	Extracellular Space	other
WASF2	WAS protein family, member 2	1.942	Plasma Membrane	other
Wasl	Wiskott-Aldrich syndrome-like (human)	1.856	Cytoplasm	other
WDR31	WD repeat domain 31	-1.702	Other	peptidase
WDR86	WD repeat domain 86	-1.595	Other	other
WNT6	wingless-type MMTV integration site family, member 6	-1.683	Extracellular Space	other
WWC1	WW and C2 domain containing 1	1.555	Cytoplasm	transcription regulator
XKR6	XK, Kell blood group complex subunit-related family, member 6	1.607	Other	other
ZBTB38	zinc finger and BTB domain containing 38	1.89	Nucleus	transcription regulator
ZBTB7A	zinc finger and BTB domain containing 7A	1.691	Nucleus	transcription regulator
ZBTB8A	zinc finger and BTB domain containing 8A	-1.843	Nucleus	other
ZC3H13	zinc finger CCCH-type containing 13	1.666	Extracellular Space	other
ZC3HAV1	zinc finger CCCH-type, antiviral 1	-1.689	Plasma Membrane	other
ZDHHC1	zinc finger, DHHC-type containing 1	1.535	Nucleus	enzyme
Zfp114	zinc finger protein 114	-1.932	Other	other
Zfp185	zinc finger protein 185	-1.635	Nucleus	other
Zfp459	zinc finger protein 459	1.551	Other	other
Zfp708	zinc finger protein 708	-1.608	Other	other
Zfp759	zinc finger protein 759	-2.343	Other	other
Zfp868	zinc finger protein 868	-1.552	Other	other
ZFP36L1	ZFP36 ring finger protein-like 1	-1.511	Nucleus	transcription regulator
Zfp36l3	zinc finger protein 36, C3H type-like 3	1.823	Cytoplasm	other
Zfp960/Zfp97	zinc finger protein 97	-1.784	Nucleus	other
ZIC2	Zic family member 2	-1.582	Nucleus	transcription regulator
ZIC4	Zic family member 4	1.921	Nucleus	other
ZMYND8	zinc finger, MYND-type containing 8	1.862	Nucleus	transcription regulator
ZNF292	zinc finger protein 292	1.517	Nucleus	transcription regulator
ZNF397	zinc finger protein 397	1.5	Nucleus	transcription regulator
ZNF420	zinc finger protein 420	1.541	Cytoplasm	other
ZNF423	zinc finger protein 423	1.849	Nucleus	transcription regulator
ZNF442	zinc finger protein 442	-1.831	Nucleus	other
ZNF445	zinc finger protein 445	1.588	Nucleus	transcription regulator
ZNF551	zinc finger protein 551	-1.498	Nucleus	other
ZNF593	zinc finger protein 593	-1.533	Nucleus	transcription regulator
ZNF618	zinc finger protein 618	-1.517	Other	other
ZNF627	zinc finger protein 627	-1.494	Other	other
ZNF664	zinc finger protein 664	1.653	Nucleus	other
ZNF691	zinc finger protein 691	1.586	Nucleus	other
ZNF778	zinc finger protein 778	-1.647	Nucleus	other
ZNF585A	zinc finger protein 585A	-1.575	Nucleus	other
ZWINT	ZW10 interacting kinetochore protein	-1.573	Nucleus	other

## Sheet: Table S4
SPECIFIC DEGs FOR HIPPOCAMPUS IN WTVD+ AT M9
Gene Symbol	Entrez Gene Name	FC Hippocampus	Location	Type(s)
0610039H22Rik	RIKEN cDNA 0610039H22 gene	1.604	Other	other
0610040B10Rik	RIKEN cDNA 0610040B10 gene	1.531	Other	other
1010001B22Rik	RIKEN cDNA 1010001B22 gene	-1.549	Other	other
1600022D10Rik	RIKEN cDNA 1600022D10 gene	-55.342	Other	other
1700001D01Rik	RIKEN cDNA 1700001D01 gene	1.509	Other	other
1700001J03Rik (includes others)	RIKEN cDNA 1700001J03 gene	1.512	Other	other
1700006J14Rik	RIKEN cDNA 1700006J14 gene	-1.888	Other	other
1700027A15Rik	RIKEN cDNA 1700027A15 gene	-1.69	Other	other
1700097N02Rik	RIKEN cDNA 1700097N02 gene	-1.831	Other	other
1700120C14Rik	RIKEN cDNA 1700120C14 gene	-1.998	Other	other
1810008I18Rik	RIKEN cDNA 1810008I18 gene	-2.022	Other	other
1810053B23Rik	RIKEN cDNA 1810053B23 gene	-1.687	Other	other
2300005B03Rik	RIKEN cDNA 2300005B03 gene	-2.409	Cytoplasm	other
2310079F09Rik	RIKEN cDNA 2310079F09 gene	1.725	Other	other
2410002F23Rik	RIKEN cDNA 2410002F23 gene	-1.594	Other	other
2610319H10Rik	RIKEN cDNA 2610319H10 gene	1.539	Other	other
2900040C04Rik	RIKEN cDNA 2900040C04 gene	-1.806	Other	other
2900041H08Rik	RIKEN cDNA 2900041H08 gene	-1.647	Other	other
2900072G11Rik	RIKEN cDNA 2900072G11 gene	1.678	Other	other
2900079G21Rik	RIKEN cDNA 2900079G21 gene	-1.503	Other	other
3110001N23Rik	RIKEN cDNA 3110001N23 gene	1.85	Other	other
3300002A11Rik	RIKEN cDNA 3300002A11 gene	1.506	Other	other
4731420N21	uncharacterized protein 4731420N21	1.605	Other	other
4732423E21Rik	RIKEN cDNA 4732423E21 gene	1.557	Other	other
4733401D01Rik	RIKEN cDNA 4733401D01 gene	-3.168	Other	other
4833421G17Rik	RIKEN cDNA 4833421G17 gene	1.514	Other	other
4921511C10Rik	RIKEN cDNA 4921511C10 gene	1.565	Other	other
4921529L05Rik	RIKEN cDNA 4921529L05 gene	-1.984	Other	other
4930419G24Rik	RIKEN cDNA 4930419G24 gene	1.593	Other	other
4930426L09Rik	RIKEN cDNA 4930426L09 gene	1.82	Other	other
4930449A18Rik	RIKEN cDNA 4930449A18 gene	-1.516	Other	other
4930459I23Rik	RIKEN cDNA 4930459I23 gene	-179.673	Other	other
4930506C21Rik	RIKEN cDNA 4930506C21 gene	-1.725	Other	other
4930511E03Rik	RIKEN cDNA 4930511E03 gene	-1.589	Other	other
4930528A17Rik	RIKEN cDNA 4930528A17 gene	-1.517	Other	other
4930528J11Rik	RIKEN cDNA 4930528J11 gene	-1.497	Other	other
4932411N23Rik	RIKEN cDNA 4932411N23 gene	1.539	Other	other
4933408B17Rik	RIKEN cDNA 4933408B17 gene	1.546	Other	other
4933427D06Rik	RIKEN cDNA 4933427D06 gene	-1.513	Other	other
4933435F18Rik	RIKEN cDNA 4933435F18 gene	1.633	Other	other
4933440N22Rik	RIKEN cDNA 4933440N22 gene	-1.659	Other	other
5031415H12Rik	RIKEN cDNA 5031415H12 gene	1.861	Other	other
5031425E22Rik	RIKEN cDNA 5031425E22 gene	-1.627	Other	other
5330406M23Rik	RIKEN cDNA 5330406M23 gene	1.649	Other	other
5330431K02Rik	RIKEN cDNA 5330431K02 gene	1.512	Other	other
5730422E09Rik	RIKEN cDNA 5730422E09 gene	1.566	Other	other
5730522E02Rik	RIKEN cDNA 5730522E02 gene	-1.548	Other	other
5730526G10Rik	RIKEN cDNA 5730526G10 gene	1.529	Other	other
5830426C09Rik	RIKEN cDNA 5830426C09 gene	-1.565	Other	other
5830477G23Rik	RIKEN cDNA 5830477G23 gene	1.568	Other	other
6030451C04Rik	RIKEN cDNA 6030451C04 gene	1.653	Other	other
6030458E02Rik	RIKEN cDNA 6030458E02 gene	1.562	Other	other
6430706H07Rik	RIKEN cDNA 6430706H07 gene	1.554	Other	other
8030425K09Rik	RIKEN cDNA 8030425K09 gene	1.717	Other	other
8030453O22Rik	RIKEN cDNA 8030453O22 gene	1.81	Other	other
8430428J23Rik	RIKEN cDNA 8430428J23 gene	1.52	Other	other
8430431K14Rik	RIKEN cDNA 8430431K14 gene	1.587	Other	other
8430437O03Rik	RIKEN cDNA 8430437O03 gene	1.637	Other	other
9030419F21Rik	RIKEN cDNA 9030419F21 gene	1.638	Other	other
9030613N10Rik	RIKEN cDNA 9030613N10 gene	1.636	Other	other
9330159M07Rik	RIKEN cDNA 9330159M07 gene	-1.907	Other	other
9330159N05Rik	RIKEN cDNA 9330159N05 gene	1.778	Other	other
9330177L23Rik	RIKEN cDNA 9330177L23 gene	2.063	Other	other
9430085M18Rik	RIKEN cDNA 9430085M18 gene	-1.762	Other	other
9530029O12Rik	RIKEN cDNA 9530029O12 gene	1.519	Other	other
9530053J19Rik	RIKEN cDNA 9530053J19 gene	1.524	Other	other
A230004M16Rik	RIKEN cDNA A230004M16 gene	-1.817	Other	other
A330084C13Rik	RIKEN cDNA A330084C13 gene	-77.002	Other	other
A430088P11Rik	RIKEN cDNA A430088P11 gene	-1.617	Other	other
A4GALT	alpha 1,4-galactosyltransferase	1.509	Cytoplasm	enzyme
A630073K07Rik	RIKEN cDNA A630073K07 gene	1.541	Other	other
A730021G18Rik	RIKEN cDNA A730021G18 gene	1.634	Other	other
A730062M13Rik	RIKEN cDNA A730062M13 gene	1.836	Other	other
A830054O07Rik	RIKEN cDNA A830054O07 gene	1.601	Other	other
A930028N01Rik	RIKEN cDNA A930028N01 gene	-1.53	Other	other
AAAS	achalasia, adrenocortical insufficiency, alacrimia	-1.623	Nucleus	other
ABCA2	ATP-binding cassette, sub-family A (ABC1), member 2	-1.554	Plasma Membrane	transporter
ACHE	acetylcholinesterase (Yt blood group)	-1.5	Plasma Membrane	enzyme
Acp5	acid phosphatase 5, tartrate resistant	1.785	Cytoplasm	phosphatase
ACTL6B	actin-like 6B	-1.709	Nucleus	other
ACTN1	actinin, alpha 1	-2.188	Cytoplasm	transcription regulator
ACYP2	acylphosphatase 2, muscle type	1.532	Cytoplasm	enzyme
ADAM11	ADAM metallopeptidase domain 11	-1.584	Plasma Membrane	peptidase
ADAMTS9	ADAM metallopeptidase with thrombospondin type 1 motif, 9	-20.168	Extracellular Space	peptidase
ADI1	acireductone dioxygenase 1	-1.504	Nucleus	enzyme
ADRA1B	adrenoceptor alpha 1B	-2.201	Plasma Membrane	G-protein coupled receptor
ADRA2C	adrenoceptor alpha 2C	1.574	Plasma Membrane	G-protein coupled receptor
AES	amino-terminal enhancer of split	-1.603	Nucleus	transcription regulator
AGMO	alkylglycerol monooxygenase	1.666	Cytoplasm	enzyme
Ahsp	alpha hemoglobin stabilizing protein	1.723	Cytoplasm	other
AI605517	expressed sequence AI605517	1.538	Other	other
AI790442	expressed sequence AI790442	1.953	Other	other
Airn	antisense Igf2r RNA	1.512	Nucleus	other
AKAP7	A kinase (PRKA) anchor protein 7	1.943	Plasma Membrane	other
ALAD	aminolevulinate dehydratase	-1.505	Cytoplasm	enzyme
ALDH3A1	aldehyde dehydrogenase 3 family, member A1	1.586	Cytoplasm	enzyme
ALG3	ALG3, alpha-1,3- mannosyltransferase	-1.663	Cytoplasm	enzyme
AMDHD2	amidohydrolase domain containing 2	-3.427	Nucleus	enzyme
AMN1	antagonist of mitotic exit network 1 homolog (S. cerevisiae)	1.551	Plasma Membrane	other
ANG	angiogenin, ribonuclease, RNase A family, 5	-1.656	Extracellular Space	enzyme
Ang4	angiogenin, ribonuclease A family, member 4	-1.579	Other	enzyme
ANKRD55	ankyrin repeat domain 55	1.513	Nucleus	transcription regulator
APH1B	APH1B gamma secretase subunit	1.551	Other	peptidase
APOA2	apolipoprotein A-II	-1.537	Extracellular Space	transporter
APOBEC3B	apolipoprotein B mRNA editing enzyme, catalytic polypeptide-like 3B	-2.293	Cytoplasm	enzyme
Apol7e (includes others)	apolipoprotein L 7e	1.601	Other	other
AQP1	aquaporin 1 (Colton blood group)	1.739	Plasma Membrane	transporter
ARF5	ADP-ribosylation factor 5	-1.536	Cytoplasm	enzyme
ARFIP2	ADP-ribosylation factor interacting protein 2	1.533	Cytoplasm	other
ARHGAP1	Rho GTPase activating protein 1	-1.577	Cytoplasm	other
ARHGAP10	Rho GTPase activating protein 10	-1.583	Cytoplasm	other
ARHGAP33	Rho GTPase activating protein 33	-1.772	Plasma Membrane	transporter
ARHGEF11	Rho guanine nucleotide exchange factor (GEF) 11	-8.14	Cytoplasm	other
ARHGEF40	Rho guanine nucleotide exchange factor (GEF) 40	-1.517	Other	other
ARID1A	AT rich interactive domain 1A (SWI-like)	-1.513	Nucleus	transcription regulator
ARID3B	AT rich interactive domain 3B (BRIGHT-like)	-1.531	Nucleus	other
ARL4C	ADP-ribosylation factor-like 4C	-1.926	Nucleus	enzyme
ARMC2	armadillo repeat containing 2	1.501	Extracellular Space	other
ARPC4	actin related protein 2/3 complex, subunit 4, 20kDa	-1.645	Cytoplasm	other
ARRDC4	arrestin domain containing 4	1.636	Other	other
ASB12	ankyrin repeat and SOCS box containing 12	1.512	Nucleus	transcription regulator
ASPSCR1	alveolar soft part sarcoma chromosome region, candidate 1	-1.586	Cytoplasm	other
ASTN2	astrotactin 2	-1.926	Cytoplasm	other
ATAT1	alpha tubulin acetyltransferase 1	-1.624	Cytoplasm	enzyme
ATP2B4	ATPase, Ca++ transporting, plasma membrane 4	-1.599	Plasma Membrane	transporter
AU016916	expressed sequence AU016916	-2451.55	Other	other
AU018091	expressed sequence AU018091	1.567	Other	other
AU020094	expressed sequence AU020094	-1.541	Other	other
AUTS2	autism susceptibility candidate 2	-1.601	Nucleus	other
AW551984	expressed sequence AW551984	-1.601	Other	other
B130006D01Rik	--	1.593	Other	other
B130024G19Rik	RIKEN cDNA B130024G19 gene	1.636	Other	other
B230110G15Rik	RIKEN cDNA B230110G15 gene	1.662	Other	other
B230206H07Rik	RIKEN cDNA B230206H07 gene	-49.906	Other	other
B430316J06Rik	RIKEN cDNA B430316J06 gene	1.517	Other	other
B930025B16Rik	RIKEN cDNA B930025B16 gene	1.505	Other	other
B930095M22Rik	RIKEN cDNA B930095M22 gene	1.765	Other	other
BAIAP2L2	BAI1-associated protein 2-like 2	-1.567	Cytoplasm	other
BAP1	BRCA1 associated protein-1 (ubiquitin carboxy-terminal hydrolase)	-1.515	Nucleus	peptidase
BB166591	expressed sequence BB166591	1.511	Other	other
BC006965	cDNA sequence BC006965	1.544	Other	other
BC028471	cDNA sequence BC028471	-1.626	Other	other
BC037032	cDNA Sequence BC037032	-1.81	Other	other
BC043934	cDNA sequence BC043934	-1.551	Other	other
BCL3	B-cell CLL/lymphoma 3	1.64	Nucleus	transcription regulator
BCL2L14	BCL2-like 14 (apoptosis facilitator)	-2.137	Cytoplasm	other
BCL2L15	BCL2-like 15	1.65	Nucleus	other
BCL9L	B-cell CLL/lymphoma 9-like	-1.526	Cytoplasm	other
BFSP1	beaded filament structural protein 1, filensin	1.625	Cytoplasm	enzyme
BIN3	bridging integrator 3	1.546	Cytoplasm	other
BLNK	B-cell linker	1.661	Cytoplasm	other
BMP1	bone morphogenetic protein 1	-1.539	Extracellular Space	peptidase
BPIFB1	BPI fold containing family B, member 1	-1.634	Extracellular Space	other
C6	complement component 6	-101.913	Extracellular Space	other
C030010L15Rik	RIKEN cDNA C030010L15 gene	1.561	Other	other
C10orf10	chromosome 10 open reading frame 10	-1.538	Cytoplasm	other
C11orf16	chromosome 11 open reading frame 16	-2.608	Other	other
C12orf10	chromosome 12 open reading frame 10	-1.583	Nucleus	other
C130060K24Rik	RIKEN cDNA C130060K24 gene	-1.942	Plasma Membrane	G-protein coupled receptor
C130090I23Rik	RIKEN cDNA C130090I23 gene	1.522	Other	other
C16orf59	chromosome 16 open reading frame 59	2.182	Other	other
C17orf70	chromosome 17 open reading frame 70	-1.534	Nucleus	other
C19orf38	chromosome 19 open reading frame 38	-1.681	Other	other
C19orf60	chromosome 19 open reading frame 60	-1.608	Other	other
C1orf159	chromosome 1 open reading frame 159	-34.543	Other	other
C1QB	complement component 1, q subcomponent, B chain	-1.832	Extracellular Space	other
C1QL1	complement component 1, q subcomponent-like 1	-1.501	Extracellular Space	other
C1QTNF4	C1q and tumor necrosis factor related protein 4	-1.606	Extracellular Space	other
C1R	complement component 1, r subcomponent	1.5	Extracellular Space	peptidase
C20orf27	chromosome 20 open reading frame 27	-1.586	Other	other
C230085N15Rik	RIKEN cDNA C230085N15 gene	1.563	Other	other
C230096K16Rik	RIKEN cDNA C230096K16 gene	1.654	Other	other
C2CD4A	C2 calcium-dependent domain containing 4A	-1.557	Other	other
C2orf40	chromosome 2 open reading frame 40	1.553	Extracellular Space	other
C2orf76	chromosome 2 open reading frame 76	-3.246	Other	other
C4orf33	chromosome 4 open reading frame 33	-1.642	Other	other
C87414 (includes others)	expressed sequence C87414	-1.771	Other	other
CA4	carbonic anhydrase IV	-1.72	Plasma Membrane	enzyme
CA10	carbonic anhydrase X	1.545	Other	enzyme
CACNA1H	calcium channel, voltage-dependent, T type, alpha 1H subunit	2.359	Plasma Membrane	ion channel
CACNG7	calcium channel, voltage-dependent, gamma subunit 7	-1.643	Plasma Membrane	ion channel
CALCOCO1	calcium binding and coiled-coil domain 1	-1.646	Nucleus	transcription regulator
CAMK1	calcium/calmodulin-dependent protein kinase I	-1.724	Cytoplasm	kinase
CAMK2N1	calcium/calmodulin-dependent protein kinase II inhibitor 1	-1.745	Plasma Membrane	kinase
CAMP	cathelicidin antimicrobial peptide	2.102	Cytoplasm	other
CASP14	caspase 14, apoptosis-related cysteine peptidase	-2.14	Cytoplasm	peptidase
CCDC18	coiled-coil domain containing 18	-1.662	Other	other
CCDC57	coiled-coil domain containing 57	-1.66	Other	other
CCDC82	coiled-coil domain containing 82	-1.505	Other	other
CCDC136	coiled-coil domain containing 136	-1.497	Cytoplasm	other
Ccl7	chemokine (C-C motif) ligand 7	1.791	Extracellular Space	cytokine
CCND3	cyclin D3	-1.527	Nucleus	other
CCNF	cyclin F	1.545	Nucleus	other
CCNT1	cyclin T1	-1.822	Nucleus	transcription regulator
CD34	CD34 molecule	1.601	Plasma Membrane	other
CD164L2	CD164 sialomucin-like 2	-1.539	Other	other
CD300LG	CD300 molecule-like family member g	-1.853	Plasma Membrane	other
CD5L	CD5 molecule-like	2.165	Plasma Membrane	transmembrane receptor
CDCA7	cell division cycle associated 7	1.726	Nucleus	other
CDKL3	cyclin-dependent kinase-like 3	1.564	Cytoplasm	kinase
CDON	cell adhesion associated, oncogene regulated	1.516	Plasma Membrane	other
CDYL2	chromodomain protein, Y-like 2	1.543	Nucleus	other
CEACAM16	carcinoembryonic antigen-related cell adhesion molecule 16	1.636	Cytoplasm	transcription regulator
CEP250	centrosomal protein 250kDa	-1.775	Nucleus	other
CFTR	cystic fibrosis transmembrane conductance regulator (ATP-binding cassette sub-family C, member 7)	1.87	Plasma Membrane	ion channel
CHAT	choline O-acetyltransferase	1.987	Nucleus	enzyme
CHRNA2	cholinergic receptor, nicotinic, alpha 2 (neuronal)	-1.57	Plasma Membrane	transmembrane receptor
CHRNB4	cholinergic receptor, nicotinic, beta 4 (neuronal)	-1.859	Plasma Membrane	transmembrane receptor
CHST10	carbohydrate sulfotransferase 10	1.537	Cytoplasm	enzyme
CHST13	carbohydrate (chondroitin 4) sulfotransferase 13	-1.713	Cytoplasm	enzyme
CITED4	Cbp/p300-interacting transactivator, with Glu/Asp-rich carboxy-terminal domain, 4	-1.5	Nucleus	transcription regulator
CKAP4	cytoskeleton-associated protein 4	1.513	Cytoplasm	other
CLCN5	chloride channel, voltage-sensitive 5	-86.696	Plasma Membrane	ion channel
CLIC6	chloride intracellular channel 6	1.633	Plasma Membrane	ion channel
CLPTM1	cleft lip and palate associated transmembrane protein 1	-1.737	Plasma Membrane	other
CMPK2	cytidine monophosphate (UMP-CMP) kinase 2, mitochondrial	-2.027	Cytoplasm	kinase
CMTM7	CKLF-like MARVEL transmembrane domain containing 7	1.594	Extracellular Space	cytokine
CNFN	cornifelin	1.517	Cytoplasm	other
CNN2	calponin 2	-1.664	Cytoplasm	other
CNNM3	cyclin and CBS domain divalent metal cation transport mediator 3	-1.983	Other	other
CNTLN	centlein, centrosomal protein	-13.75	Cytoplasm	other
COL11A1	collagen, type XI, alpha 1	1.659	Extracellular Space	other
COL16A1	collagen, type XVI, alpha 1	1.876	Extracellular Space	other
COL28A1	collagen, type XXVIII, alpha 1	1.632	Extracellular Space	other
COPE	coatomer protein complex, subunit epsilon	-1.518	Cytoplasm	transporter
COX4I2	cytochrome c oxidase subunit IV isoform 2 (lung)	-1.503	Cytoplasm	enzyme
Cox7b2	cytochrome c oxidase subunit VIIb2	1.546	Other	other
Cox8b	cytochrome c oxidase subunit VIIIb	2.041	Cytoplasm	enzyme
CPNE9	copine family member IX	-1.59	Extracellular Space	other
Crb3	crumbs family member 3	1.759	Plasma Membrane	other
CRHR2	corticotropin releasing hormone receptor 2	1.513	Plasma Membrane	G-protein coupled receptor
CRISPLD1	cysteine-rich secretory protein LCCL domain containing 1	1.733	Cytoplasm	other
CSDC2	cold shock domain containing C2, RNA binding	-1.976	Cytoplasm	other
CSF1	colony stimulating factor 1 (macrophage)	1.793	Extracellular Space	cytokine
CSTA	cystatin A (stefin A)	2.443	Cytoplasm	other
CTDSP2	CTD (carboxy-terminal domain, RNA polymerase II, polypeptide A) small phosphatase 2	1.522	Nucleus	phosphatase
Ctla2a/Ctla2b	cytotoxic T lymphocyte-associated protein 2 alpha	1.581	Plasma Membrane	other
CTXN1	cortexin 1	-2.08	Other	other
CUEDC1	CUE domain containing 1	-1.6	Other	other
CXCL6	chemokine (C-X-C motif) ligand 6	1.862	Extracellular Space	cytokine
CYB5R4	cytochrome b5 reductase 4	1.556	Cytoplasm	enzyme
CYP2A6 (includes others)	cytochrome P450, family 2, subfamily A, polypeptide 6	-2.369	Cytoplasm	enzyme
CYP2C9	cytochrome P450, family 2, subfamily C, polypeptide 9	-171.17	Cytoplasm	enzyme
CYP46A1	cytochrome P450, family 46, subfamily A, polypeptide 1	-1.53	Cytoplasm	enzyme
CYP4F2	cytochrome P450, family 4, subfamily F, polypeptide 2	-1.654	Cytoplasm	enzyme
CYP4F8	cytochrome P450, family 4, subfamily F, polypeptide 8	-1.68	Cytoplasm	enzyme
D030028A08Rik	RIKEN cDNA D030028A08 gene	-1.973	Other	other
D10Bwg1070e	DNA segment, Chr 10, Brigham & Women's Genetics 1070 expressed	1.532	Other	other
D13Ertd787e	DNA segment, Chr 13, ERATO Doi 787, expressed	1.516	Other	other
D1Ertd704e	DNA segment, Chr 1, ERATO Doi 704, expressed	1.595	Other	other
D230018H15Rik	RIKEN cDNA D230018H15 gene	1.68	Other	other
D230034L24Rik	RIKEN cDNA D230034L24 gene	1.553	Other	other
D230044B12Rik	RIKEN cDNA D230044B12 gene	1.668	Other	other
D430004P15Rik	Riken cDNA D430004P15 gene	1.552	Other	other
D4Ertd681e	DNA segment, Chr 4, ERATO Doi 681, expressed	1.648	Other	other
D8Ertd158e	DNA segment, Chr 8, ERATO Doi 158, expressed	1.75	Other	other
D930001M23Rik	Riken cDNA D930001M23 gene	1.54	Other	other
D9Wsu90e	DNA segment, Chr 9, Wayne State University 90, expressed	1.54	Other	other
DCAF4	DDB1 and CUL4 associated factor 4	-1.578	Other	other
DCHS1	dachsous cadherin-related 1	-1.605	Plasma Membrane	other
DCXR	dicarbonyl/L-xylulose reductase	-2.204	Cytoplasm	enzyme
DDI1	DNA-damage inducible 1 homolog 1 (S. cerevisiae)	-3.172	Other	other
DDR1	discoidin domain receptor tyrosine kinase 1	1.608	Plasma Membrane	kinase
DEF6	differentially expressed in FDCP 6 homolog (mouse)	-1.778	Extracellular Space	other
DHCR7	7-dehydrocholesterol reductase	-1.744	Cytoplasm	enzyme
DHTKD1	dehydrogenase E1 and transketolase domain containing 1	1.563	Cytoplasm	enzyme
DLEC1	deleted in lung and esophageal cancer 1	-2.019	Cytoplasm	other
DLGAP2	discs, large (Drosophila) homolog-associated protein 2	1.645	Plasma Membrane	other
DLX3	distal-less homeobox 3	-1.565	Nucleus	transcription regulator
DMKN	dermokine	1.52	Extracellular Space	other
DPF1	D4, zinc and double PHD fingers family 1	-1.605	Nucleus	other
DPP6	dipeptidyl-peptidase 6	1.787	Plasma Membrane	other
DSCAML1	Down syndrome cell adhesion molecule like 1	1.744	Plasma Membrane	other
DSP	desmoplakin	1.601	Plasma Membrane	other
DTX3	deltex 3, E3 ubiquitin ligase	-2.425	Cytoplasm	other
DYRK1B	dual-specificity tyrosine-(Y)-phosphorylation regulated kinase 1B	-1.904	Nucleus	kinase
E030030I06Rik	RIKEN cDNA E030030I06 gene	-1.733	Other	kinase
E130116L18Rik	RIKEN cDNA E130116L18 gene	-1.676	Other	other
E430010N07Rik	RIKEN cDNA E430010N07 gene	-1.56	Other	other
E430022K19Rik	RIKEN cDNA E430022K19 gene	1.508	Other	other
Ear12	eosinophil-associated, ribonuclease A family, member 12	-1.806	Other	other
EBF3	early B-cell factor 3	1.515	Nucleus	other
EDN2	endothelin 2	-1.52	Extracellular Space	growth factor
EFCAB9	EF-hand calcium binding domain 9	1.763	Other	other
EFHC2	EF-hand domain (C-terminal) containing 2	-605.567	Other	other
EFNA1	ephrin-A1	1.554	Plasma Membrane	other
EGLN2	egl-9 family hypoxia-inducible factor 2	-1.53	Cytoplasm	enzyme
EHD3	EH-domain containing 3	2.203	Cytoplasm	other
EIF4G3	eukaryotic translation initiation factor 4 gamma, 3	-1.529	Cytoplasm	translation regulator
ENKUR	enkurin, TRPC channel interacting protein	1.591	Other	other
EPC2	enhancer of polycomb homolog 2 (Drosophila)	-1.769	Other	other
EPHA10	EPH receptor A10	1.567	Plasma Membrane	transmembrane receptor
EPHX3	epoxide hydrolase 3	-1.564	Other	enzyme
EPPIN	epididymal peptidase inhibitor	-1.927	Extracellular Space	other
EPX	eosinophil peroxidase	-88.316	Cytoplasm	enzyme
ERCC6L	excision repair cross-complementation group 6-like	-3.034	Nucleus	other
ERICH5	glutamate-rich 5	-3.143	Other	other
Erv3	endogenous retroviral sequence 3	-1.732	Other	other
ESR1	estrogen receptor 1	-7.498	Nucleus	ligand-dependent nuclear receptor
ETV4	ets variant 4	-1.502	Nucleus	transcription regulator
EXD1	exonuclease 3'-5' domain containing 1	1.5	Other	other
F10	coagulation factor X	1.545	Extracellular Space	peptidase
F830212C03Rik	RIKEN cDNA F830212C03 gene	1.645	Other	other
FAM127C	family with sequence similarity 127, member C	-1.77	Other	other
FAM134A	family with sequence similarity 134, member A	-1.531	Other	other
FAM53B	family with sequence similarity 53, member B	1.58	Other	other
FAS	Fas cell surface death receptor	1.54	Plasma Membrane	transmembrane receptor
FBLN1	fibulin 1	-1.655	Extracellular Space	other
FBN2	fibrillin 2	-1.51	Extracellular Space	other
FBRS	fibrosin	-1.643	Extracellular Space	cytokine
FBXO24	F-box protein 24	-2.036	Other	enzyme
FCGR2B	Fc fragment of IgG, low affinity IIb, receptor (CD32)	1.542	Plasma Membrane	transmembrane receptor
FCGR3A/FCGR3B	Fc fragment of IgG, low affinity IIIa, receptor (CD16a)	1.502	Plasma Membrane	transmembrane receptor
FCRL5	Fc receptor-like 5	-1.62	Plasma Membrane	other
Fcrls	Fc receptor-like S, scavenger receptor	-1.666	Plasma Membrane	other
FDXACB1	ferredoxin-fold anticodon binding domain containing 1	-1.512	Other	other
FGF2	fibroblast growth factor 2 (basic)	-2.085	Extracellular Space	growth factor
FGF23	fibroblast growth factor 23	-1.548	Extracellular Space	growth factor
FIGNL1	fidgetin-like 1	-1.577	Nucleus	enzyme
FKBP8	FK506 binding protein 8, 38kDa	-1.802	Cytoplasm	other
Fmnl1	formin-like 1	-1.643	Cytoplasm	other
Frmpd3	FERM and PDZ domain containing 3	1.635	Other	other
FSIP2	fibrous sheath interacting protein 2	-3.505	Cytoplasm	other
FST	follistatin	1.59	Extracellular Space	other
FUZ	fuzzy planar cell polarity protein	-1.547	Plasma Membrane	other
FXYD7	FXYD domain containing ion transport regulator 7	-1.556	Plasma Membrane	ion channel
FZR1	fizzy/cell division cycle 20 related 1 (Drosophila)	-1.507	Nucleus	kinase
GAB3	GRB2-associated binding protein 3	1.569	Other	other
GABBR2	gamma-aminobutyric acid (GABA) B receptor, 2	1.501	Plasma Membrane	G-protein coupled receptor
GALNS	galactosamine (N-acetyl)-6-sulfatase	-1.939	Cytoplasm	enzyme
GAPT	GRB2-binding adaptor protein, transmembrane	-2.171	Other	other
GAS2L2	growth arrest-specific 2 like 2	-1.586	Cytoplasm	other
GATA3	GATA binding protein 3	1.504	Nucleus	transcription regulator
GATA5	GATA binding protein 5	-2.038	Nucleus	transcription regulator
GBAS	glioblastoma amplified sequence	-1.812	Plasma Membrane	other
GBP4	guanylate binding protein 4	1.504	Cytoplasm	enzyme
GBX2	gastrulation brain homeobox 2	-1.546	Nucleus	transcription regulator
Gcg	glucagon	1.557	Cytoplasm	other
GDF1	growth differentiation factor 1	1.565	Extracellular Space	growth factor
GIGYF1	GRB10 interacting GYF protein 1	-1.644	Extracellular Space	other
GIMAP4	GTPase, IMAP family member 4	-1.675	Nucleus	other
GLP2R	glucagon-like peptide 2 receptor	3.451	Plasma Membrane	G-protein coupled receptor
Gm281	predicted gene 281	1.509	Other	other
Gm831	predicted gene 831	-1.666	Other	other
Gm1141	predicted gene 1141	1.623	Nucleus	other
Gm2347	predicted gene 2347	1.673	Other	other
Gm2560	predicted gene 2560	-1.591	Other	other
Gm3364	predicted gene 3364	1.696	Other	other
Gm3515	predicted gene 3515	1.59	Other	other
Gm3613	predicted gene 3613	1.569	Other	other
Gm4146	predicted gene 4146	-1.555	Other	other
Gm4221	predicted gene 4221	-1.531	Other	other
Gm4316	predicted gene 4316	-1.627	Other	other
Gm4788	predicted gene 4788	1.516	Other	other
Gm4814	predicted gene 4814	1.607	Other	other
Gm5069	glyceraldehyde-3-phosphate dehydrogenase pseudogene	-1.526	Other	other
Gm5079	predicted gene 5079	-1.978	Other	other
Gm5105	predicted gene 5105	-2.171	Other	other
Gm5481	predicted gene 5481	-1.501	Other	other
Gm5737	predicted gene 5737	1.914	Other	other
Gm5784	predicted gene 5784	1.753	Other	other
Gm5858	predicted gene 5858	2.294	Other	other
Gm6133	60S ribosomal protein L17 pseudogene	-1.572	Other	other
Gm6306	predicted gene 6306	1.6	Other	other
Gm6498	glyceraldehyde-3-phosphate dehydrogenase pseudogene	-1.566	Other	other
Gm6867	predicted gene 6867	-1.688	Other	other
Gm6961	predicted gene 6961	1.591	Other	other
Gm6981	glyceraldehyde-3-phosphate dehydrogenase pseudogene	-1.781	Other	other
Gm7265	predicted gene 7265	1.551	Other	other
Gm7854	predicted gene 7854	4.937	Other	other
Gm8066	predicted gene 8066	-1.516	Other	other
Gm8709	glyceraldehyde-3-phosphate dehydrogenase pseudogene	-1.721	Other	other
Gm9376	predicted gene 9376	-1.768	Other	other
Gm9821	predicted gene 9821	-1.777	Other	other
Gm9886	predicted gene 9886	-1.666	Other	other
Gm10136	ribosomal protein L26 pseudogene	-1.797	Other	other
Gm10244	predicted gene 10244	-71.623	Other	other
Gm10371	predicted gene 10371	-1.547	Other	other
Gm10401	predicted gene 10401	-2.146	Other	other
Gm10493	predicted gene 10493	-1.674	Other	other
Gm11564	predicted gene 11564	1.594	Other	other
Gm13021	predicted gene 13021	-1.513	Other	other
Gm13238	carnitine deficiency-associated gene expressed in ventricle 3 pseudogene	1.502	Other	other
Gm13770	predicted gene 13770	-2.084	Other	other
Gm15032	predicted gene 15032	-1.496	Other	other
Gm15130	predicted gene 15130	-1.709	Other	other
Gm15517	predicted gene 15517	-1.789	Other	other
Gm15520	predicted gene 15520	1.638	Other	other
Gm33780	predicted gene, 33780	-2.122	Other	other
Gm35772	predicted gene, 35772	-1.739	Other	other
Gm11543 (includes others)	transmembrane protein 92	-193.26	Other	other
Gm3325/Zfp808	zinc finger protein 80	1.536	Other	other
Gm4745 (includes others)	predicted gene 4745	-4.496	Other	other
Gm6583/Gm6588	predicted gene 6588	2.499	Other	other
Gm6811 (includes others)	sperm motility kinase Y pseudogene	1.603	Other	other
Gm8882 (includes others)	proline-rich protein BstNI subfamily 1	-1.855	Extracellular Space	other
GMPS	guanine monphosphate synthase	-1.499	Nucleus	enzyme
GNG8	guanine nucleotide binding protein (G protein), gamma 8	-2.569	Plasma Membrane	enzyme
GOLT1A	golgi transport 1A	-1.577	Other	other
GPR4	G protein-coupled receptor 4	-1.495	Plasma Membrane	G-protein coupled receptor
GPR151	G protein-coupled receptor 151	-1.543	Plasma Membrane	G-protein coupled receptor
GPR157	G protein-coupled receptor 157	-3.053	Plasma Membrane	G-protein coupled receptor
GPS2	G protein pathway suppressor 2	-1.616	Nucleus	transcription regulator
GRIA1	glutamate receptor, ionotropic, AMPA 1	1.68	Plasma Membrane	ion channel
GRIK5	glutamate receptor, ionotropic, kainate 5	-1.502	Plasma Membrane	ion channel
GRIN1	glutamate receptor, ionotropic, N-methyl D-aspartate 1	-1.701	Plasma Membrane	ion channel
Gstm3	glutathione S-transferase, mu 3	-1.498	Cytoplasm	enzyme
Gstm6	glutathione S-transferase, mu 6	-1.639	Cytoplasm	enzyme
GUCY1A2	guanylate cyclase 1, soluble, alpha 2	1.528	Cytoplasm	enzyme
GXYLT2	glucoside xylosyltransferase 2	-1.509	Other	other
H2-Q8	histocompatibility 2, Q region locus 8	1.618	Plasma Membrane	other
HAPLN4	hyaluronan and proteoglycan link protein 4	-1.647	Extracellular Space	other
HEBP1	heme binding protein 1	1.555	Cytoplasm	other
HES7	hes family bHLH transcription factor 7	-1.531	Nucleus	transcription regulator
HESX1	HESX homeobox 1	-120.886	Nucleus	transcription regulator
HEXDC	hexosaminidase (glycosyl hydrolase family 20, catalytic domain) containing	-1.613	Other	other
HEXIM2	hexamethylene bis-acetamide inducible 2	-1.594	Nucleus	transcription regulator
Hils1	histone H1-like protein in spermatids 1	-137.007	Nucleus	other
HIPK3	homeodomain interacting protein kinase 3	-44.372	Nucleus	kinase
HIST1H2BA	histone cluster 1, H2ba	-1.648	Nucleus	other
HIST1H2BO	histone cluster 1, H2bo	-1.684	Nucleus	other
HLA-A	major histocompatibility complex, class I, A	1.578	Plasma Membrane	other
HSF4	heat shock transcription factor 4	-1.854	Nucleus	transcription regulator
HSPBP1	HSPA (heat shock 70kDa) binding protein, cytoplasmic cochaperone 1	-1.759	Cytoplasm	other
HTRA4	HtrA serine peptidase 4	1.507	Other	peptidase
IDUA	iduronidase, alpha-L-	-1.504	Cytoplasm	enzyme
IFIH1	interferon induced with helicase C domain 1	-42.909	Nucleus	enzyme
IFITM3	interferon induced transmembrane protein 3	-1.638	Plasma Membrane	other
IGFBPL1	insulin-like growth factor binding protein-like 1	1.73	Other	other
IGSF9	immunoglobulin superfamily, member 9	1.595	Plasma Membrane	other
IGSF9B	immunoglobulin superfamily, member 9B	-1.539	Plasma Membrane	other
Igtp	interferon gamma induced GTPase	1.582	Cytoplasm	enzyme
IMPG1	interphotoreceptor matrix proteoglycan 1	-1.864	Extracellular Space	other
INA	internexin neuronal intermediate filament protein, alpha	1.623	Cytoplasm	other
INCENP	inner centromere protein antigens 135/155kDa	1.708	Nucleus	other
INPP4B	inositol polyphosphate-4-phosphatase, type II, 105kDa	-1.626	Cytoplasm	phosphatase
IRGM	immunity-related GTPase family, M	1.601	Cytoplasm	enzyme
Irs4	insulin receptor substrate 4	-1.639	Other	other
IRX4	iroquois homeobox 4	-2.363	Nucleus	transcription regulator
ITGA3	integrin, alpha 3 (antigen CD49C, alpha 3 subunit of VLA-3 receptor)	-1.561	Plasma Membrane	other
ITGA5	integrin, alpha 5 (fibronectin receptor, alpha polypeptide)	-1.509	Plasma Membrane	transmembrane receptor
JOSD2	Josephin domain containing 2	-1.686	Other	enzyme
JUNB	jun B proto-oncogene	-1.497	Nucleus	transcription regulator
KCNA1	potassium channel, voltage gated shaker related subfamily A, member 1	1.525	Plasma Membrane	ion channel
KCNA6	potassium channel, voltage gated shaker related subfamily A, member 6	-1.711	Plasma Membrane	ion channel
KCNE2	potassium channel, voltage gated subfamily E regulatory beta subunit 2	1.688	Plasma Membrane	ion channel
KCNH4	potassium channel, voltage gated eag related subfamily H, member 4	-1.559	Plasma Membrane	ion channel
KCNQ2	potassium channel, voltage gated KQT-like subfamily Q, member 2	1.64	Plasma Membrane	ion channel
KCTD13	potassium channel tetramerization domain containing 13	-1.557	Nucleus	ion channel
KDM5C	lysine (K)-specific demethylase 5C	-1.535	Nucleus	other
KIAA0556	KIAA0556	-1.783	Extracellular Space	other
KIAA1467	KIAA1467	-1.542	Other	other
KIDINS220	kinase D-interacting substrate, 220kDa	1.572	Nucleus	transcription regulator
KIF19	kinesin family member 19	-1.67	Extracellular Space	enzyme
KL	klotho	1.636	Extracellular Space	enzyme
KLF5	Kruppel-like factor 5 (intestinal)	-1.548	Nucleus	transcription regulator
KLHDC7A	kelch domain containing 7A	-2.182	Other	other
KLHDC8A	kelch domain containing 8A	-3.802	Other	other
KLHL4	kelch-like family member 4	1.523	Cytoplasm	other
KLK10	kallikrein-related peptidase 10	-195.995	Extracellular Space	peptidase
Klri1	killer cell lectin-like receptor family I member 1	2.03	Plasma Membrane	transmembrane receptor
KRIT1	KRIT1, ankyrin repeat containing	-6.368	Plasma Membrane	other
KRT1	keratin 1, type II	-1.505	Cytoplasm	other
KRT18	keratin 18, type I	1.599	Cytoplasm	other
KRTAP10-7	keratin associated protein 10-7	-1.625	Other	other
LALBA	lactalbumin, alpha-	-1.581	Extracellular Space	enzyme
LAMTOR3	late endosomal/lysosomal adaptor, MAPK and MTOR activator 3	1.548	Cytoplasm	other
LBH	limb bud and heart development	-1.857	Nucleus	transcription regulator
LCAT	lecithin-cholesterol acyltransferase	-1.665	Extracellular Space	enzyme
LCN2	lipocalin 2	-1.633	Extracellular Space	transporter
LDHA	lactate dehydrogenase A	-1.992	Cytoplasm	enzyme
LEF1	lymphoid enhancer-binding factor 1	-1.622	Nucleus	transcription regulator
LFNG	LFNG O-fucosylpeptide 3-beta-N-acetylglucosaminyltransferase	-1.511	Cytoplasm	enzyme
LGALS3BP	lectin, galactoside-binding, soluble, 3 binding protein	-1.606	Plasma Membrane	transmembrane receptor
LGALS9B	lectin, galactoside-binding, soluble, 9B	-1.539	Cytoplasm	other
LHFPL4	lipoma HMGIC fusion partner-like 4	-1.935	Other	other
LHX1	LIM homeobox 1	1.54	Nucleus	transcription regulator
LHX5	LIM homeobox 5	1.658	Nucleus	transcription regulator
LIG3	ligase III, DNA, ATP-dependent	1.545	Nucleus	enzyme
LIN28A	lin-28 homolog A (C. elegans)	-1.68	Cytoplasm	other
LMNTD1	lamin tail domain containing 1	1.655	Nucleus	other
LOC648044	guanine nucleotide binding protein (G protein), gamma 12-like	-5.54	Other	other
LOC100041708	nuclear body protein SP140-like	-1.796	Other	other
LOC102638184	glyceraldehyde-3-phosphate dehydrogenase pseudogene	-1.601	Other	other
LPL	lipoprotein lipase	-2.23	Cytoplasm	enzyme
LPPR2	lipid phosphate phosphatase-related protein type 2	-1.796	Other	phosphatase
LRIG2	leucine-rich repeats and immunoglobulin-like domains 2	-1.633	Cytoplasm	other
LRRC19	leucine rich repeat containing 19	-2.247	Other	other
LRRC48	leucine rich repeat containing 48	-1.509	Cytoplasm	other
LRRC16B	leucine rich repeat containing 16B	-1.562	Other	other
Lst1	leukocyte specific transcript 1	-1.531	Cytoplasm	other
LTBP2	latent transforming growth factor beta binding protein 2	1.51	Extracellular Space	other
LTF	lactotransferrin	1.883	Extracellular Space	peptidase
LY6E	lymphocyte antigen 6 complex, locus E	-1.549	Plasma Membrane	other
MAFA	v-maf avian musculoaponeurotic fibrosarcoma oncogene homolog A	-1.87	Nucleus	transcription regulator
MAGEB16	melanoma antigen family B16	1.584	Other	other
MAP1LC3A	microtubule-associated protein 1 light chain 3 alpha	-1.609	Cytoplasm	other
MAP3K6	mitogen-activated protein kinase kinase kinase 6	-1.595	Other	kinase
MAP6D1	MAP6 domain containing 1	-1.612	Cytoplasm	other
MAPK3	mitogen-activated protein kinase 3	-1.502	Cytoplasm	kinase
MAPK1IP1L	mitogen-activated protein kinase 1 interacting protein 1-like	-1.56	Nucleus	other
MARCH1	membrane-associated ring finger (C3HC4) 1, E3 ubiquitin protein ligase	-1.569	Cytoplasm	enzyme
MARK2	MAP/microtubule affinity-regulating kinase 2	-2.167	Cytoplasm	kinase
MAZ	MYC-associated zinc finger protein (purine-binding transcription factor)	-1.634	Nucleus	transcription regulator
Mcpt4	mast cell protease 4	-1.897	Other	peptidase
ME3	malic enzyme 3, NADP(+)-dependent, mitochondrial	-1.5	Cytoplasm	enzyme
MED16	mediator complex subunit 16	-1.811	Nucleus	transcription regulator
MED12L	mediator complex subunit 12-like	1.765	Extracellular Space	other
MEF2A	myocyte enhancer factor 2A	1.517	Nucleus	transcription regulator
MEF2B	myocyte enhancer factor 2B	-2.154	Nucleus	transcription regulator
MEI1	meiosis inhibitor 1	-14.002	Other	other
MEIS3	Meis homeobox 3	-1.546	Nucleus	transcription regulator
METTL17	methyltransferase like 17	-1.552	Nucleus	other
MFAP3	microfibrillar-associated protein 3	1.524	Extracellular Space	other
MICAL2	microtubule associated monooxygenase, calponin and LIM domain containing 2	1.689	Cytoplasm	enzyme
MITF	microphthalmia-associated transcription factor	1.506	Nucleus	transcription regulator
MORN1	MORN repeat containing 1	-1.662	Other	other
MPG	N-methylpurine-DNA glycosylase	-1.633	Nucleus	enzyme
MPL	MPL proto-oncogene, thrombopoietin receptor	-1.622	Plasma Membrane	transmembrane receptor
MPO	myeloperoxidase	1.836	Cytoplasm	enzyme
MPP2	membrane protein, palmitoylated 2 (MAGUK p55 subfamily member 2)	-1.535	Plasma Membrane	kinase
MRAS	muscle RAS oncogene homolog	-1.523	Plasma Membrane	enzyme
Ms4a4b (includes others)	membrane-spanning 4-domains, subfamily A, member 4B	1.872	Plasma Membrane	other
MT-ND6	NADH dehydrogenase, subunit 6 (complex I)	-1.55	Cytoplasm	enzyme
MTG1	mitochondrial ribosome-associated GTPase 1	1.524	Cytoplasm	enzyme
MTHFD2L	methylenetetrahydrofolate dehydrogenase (NADP+ dependent) 2-like	1.877	Cytoplasm	enzyme
MTR	5-methyltetrahydrofolate-homocysteine methyltransferase	-1.648	Cytoplasm	enzyme
MTUS1	microtubule associated tumor suppressor 1	-1.588	Extracellular Space	other
MYBL2	v-myb avian myeloblastosis viral oncogene homolog-like 2	1.58	Nucleus	transcription regulator
MYH1	myosin, heavy chain 1, skeletal muscle, adult	2.074	Plasma Membrane	enzyme
MYH3	myosin, heavy chain 3, skeletal muscle, embryonic	1.541	Cytoplasm	enzyme
MYH4	myosin, heavy chain 4, skeletal muscle	4.94	Cytoplasm	enzyme
MYH8	myosin, heavy chain 8, skeletal muscle, perinatal	1.693	Cytoplasm	enzyme
MYL1	myosin, light chain 1, alkali; skeletal, fast	1.867	Cytoplasm	other
MYL4	myosin, light chain 4, alkali; atrial, embryonic	1.505	Cytoplasm	other
MYL10	myosin, light chain 10, regulatory	1.524	Cytoplasm	other
MYLK3	myosin light chain kinase 3	1.759	Cytoplasm	kinase
MYO18A	myosin XVIIIA	-1.562	Cytoplasm	other
MYO18B	myosin XVIIIB	-1.524	Cytoplasm	other
MYOD1	myogenic differentiation 1	-138.166	Nucleus	transcription regulator
MYPOP	Myb-related transcription factor, partner of profilin	-1.718	Nucleus	transcription regulator
NACC1	nucleus accumbens associated 1, BEN and BTB (POZ) domain containing	-1.502	Nucleus	transcription regulator
NANOS2	nanos homolog 2 (Drosophila)	1.75	Cytoplasm	other
NANOS3	nanos homolog 3 (Drosophila)	-1.556	Other	other
NAP1L4	nucleosome assembly protein 1-like 4	-35.351	Cytoplasm	other
NAT6	N-acetyltransferase 6 (GCN5-related)	-2.001	Cytoplasm	other
Nat8b	N-acetyltransferase 8B	-1.544	Other	other
NCS1	neuronal calcium sensor 1	-1.497	Cytoplasm	other
NDN	necdin, melanoma antigen (MAGE) family member	-1.5	Nucleus	other
NEK5	NIMA-related kinase 5	1.585	Other	kinase
NFIC	nuclear factor I/C (CCAAT-binding transcription factor)	-1.619	Nucleus	transcription regulator
NFIX	nuclear factor I/X (CCAAT-binding transcription factor)	-1.525	Nucleus	transcription regulator
Ngp	neutrophilic granule protein	1.994	Extracellular Space	other
NHLH1	nescient helix loop helix 1	-1.561	Nucleus	other
NINL	ninein-like	1.583	Cytoplasm	other
NKAIN1	Na+/K+ transporting ATPase interacting 1	-1.583	Plasma Membrane	other
NLE1	notchless homolog 1 (Drosophila)	-1.495	Nucleus	enzyme
NLRC5	NLR family, CARD domain containing 5	1.514	Cytoplasm	transcription regulator
NLRP5	NLR family, pyrin domain containing 5	-122.346	Cytoplasm	other
NMBR	neuromedin B receptor	-33.701	Plasma Membrane	G-protein coupled receptor
NNAT	neuronatin	-1.838	Plasma Membrane	transporter
NOS2	nitric oxide synthase 2, inducible	-1.736	Cytoplasm	enzyme
NOTUM	notum pectinacetylesterase homolog (Drosophila)	-1.738	Extracellular Space	other
NOVA2	neuro-oncological ventral antigen 2	-1.628	Nucleus	other
NR1D1	nuclear receptor subfamily 1, group D, member 1	-1.64	Nucleus	ligand-dependent nuclear receptor
NR2C2AP	nuclear receptor 2C2-associated protein	-1.551	Nucleus	other
NR3C1	nuclear receptor subfamily 3, group C, member 1 (glucocorticoid receptor)	1.547	Nucleus	ligand-dependent nuclear receptor
NRG2	neuregulin 2	1.575	Extracellular Space	growth factor
Nrgn	neurogranin	-1.701	Plasma Membrane	other
Nrxn3	neurexin III	-1.595	Plasma Membrane	other
NSF	N-ethylmaleimide-sensitive factor	1.672	Cytoplasm	transporter
NSMAF	neutral sphingomyelinase (N-SMase) activation associated factor	1.529	Cytoplasm	other
NXNL1	nucleoredoxin-like 1	-1.97	Cytoplasm	enzyme
OCA2	oculocutaneous albinism II	1.5	Plasma Membrane	transporter
OGFOD1	2-oxoglutarate and iron-dependent oxygenase domain containing 1	-1.621	Other	other
Olfr381	olfactory receptor 381	2.46	Plasma Membrane	G-protein coupled receptor
Olfr544	olfactory receptor 544	2.271	Plasma Membrane	G-protein coupled receptor
Olfr780	olfactory receptor 780	-106.33	Plasma Membrane	G-protein coupled receptor
Olfr1109	olfactory receptor 1109	2.809	Plasma Membrane	G-protein coupled receptor
Olfr1366	olfactory receptor 1366	-1.944	Plasma Membrane	G-protein coupled receptor
Olfr1368	olfactory receptor 1368	-1.668	Plasma Membrane	G-protein coupled receptor
Olfr1466	olfactory receptor 1466	-1.735	Plasma Membrane	G-protein coupled receptor
Olfr194/Olfr203	olfactory receptor 203	-266.519	Plasma Membrane	G-protein coupled receptor
OPLAH	5-oxoprolinase (ATP-hydrolysing)	-1.534	Cytoplasm	enzyme
OR2Z1	olfactory receptor, family 2, subfamily Z, member 1	-1.705	Plasma Membrane	G-protein coupled receptor
Otub1	OTU domain, ubiquitin aldehyde binding 1	-1.572	Cytoplasm	enzyme
OTX2	orthodenticle homeobox 2	1.694	Nucleus	transcription regulator
P4HA1	prolyl 4-hydroxylase, alpha polypeptide I	1.672	Cytoplasm	enzyme
PABPC4L	poly(A) binding protein, cytoplasmic 4-like	1.515	Other	other
PANX2	pannexin 2	-1.511	Plasma Membrane	transporter
PCBP4	poly(rC) binding protein 4	-1.517	Nucleus	other
PCDH1	protocadherin 1	-1.509	Plasma Membrane	other
PDE4DIP	phosphodiesterase 4D interacting protein	1.65	Cytoplasm	enzyme
PDE6G	phosphodiesterase 6G, cGMP-specific, rod, gamma	-1.72	Cytoplasm	enzyme
PDE6H	phosphodiesterase 6H, cGMP-specific, cone, gamma	1.74	Cytoplasm	enzyme
PDK2	pyruvate dehydrogenase kinase, isozyme 2	-1.671	Cytoplasm	kinase
PDXP	pyridoxal (pyridoxine, vitamin B6) phosphatase	-1.506	Plasma Membrane	phosphatase
PDYN	prodynorphin	1.597	Extracellular Space	transporter
PEMT	phosphatidylethanolamine N-methyltransferase	-1.716	Cytoplasm	enzyme
PFKL	phosphofructokinase, liver	-1.604	Cytoplasm	kinase
PGF	placental growth factor	-1.539	Extracellular Space	growth factor
PGLYRP1	peptidoglycan recognition protein 1	-1.516	Plasma Membrane	transmembrane receptor
PHGDH	phosphoglycerate dehydrogenase	-1.546	Cytoplasm	enzyme
PIK3R2	phosphoinositide-3-kinase, regulatory subunit 2 (beta)	-1.605	Cytoplasm	kinase
PINX1	PIN2/TERF1 interacting, telomerase inhibitor 1	1.872	Nucleus	other
PKHD1	polycystic kidney and hepatic disease 1 (autosomal recessive)	-1.731	Plasma Membrane	other
PKP3	plakophilin 3	-1.925	Plasma Membrane	other
PLA2G2F	phospholipase A2, group IIF	-2.02	Extracellular Space	enzyme
PLEKHJ1	pleckstrin homology domain containing, family J member 1	-1.767	Other	other
PLEKHO2	pleckstrin homology domain containing, family O member 2	-1.82	Cytoplasm	other
PLTP	phospholipid transfer protein	-1.771	Extracellular Space	enzyme
PLVAP	plasmalemma vesicle associated protein	-1.707	Plasma Membrane	other
PNKD	paroxysmal nonkinesigenic dyskinesia	-1.501	Nucleus	other
PNLDC1	poly(A)-specific ribonuclease (PARN)-like domain containing 1	-1.57	Other	other
PODXL2	podocalyxin-like 2	-1.53	Plasma Membrane	other
POLR2A	polymerase (RNA) II (DNA directed) polypeptide A, 220kDa	-1.537	Nucleus	enzyme
POLR2C	polymerase (RNA) II (DNA directed) polypeptide C, 33kDa	-1.648	Nucleus	enzyme
POU2F2	POU class 2 homeobox 2	-1.768	Nucleus	transcription regulator
POU4F1	POU class 4 homeobox 1	-2.563	Nucleus	transcription regulator
Ppbp	pro-platelet basic protein	1.604	Other	cytokine
PPFIA3	protein tyrosine phosphatase, receptor type, f polypeptide (PTPRF), interacting protein (liprin), alpha 3	-1.508	Plasma Membrane	phosphatase
Ppnr	per-pentamer repeat gene	1.505	Other	other
PPP1R14A	protein phosphatase 1, regulatory (inhibitor) subunit 14A	-4.928	Cytoplasm	phosphatase
PPP1R14C	protein phosphatase 1, regulatory (inhibitor) subunit 14C	-1.706	Cytoplasm	other
PPP1R3B	protein phosphatase 1, regulatory subunit 3B	-1.923	Cytoplasm	other
PRCP	prolylcarboxypeptidase (angiotensinase C)	1.576	Cytoplasm	peptidase
Prl2c2 (includes others)	prolactin family 2, subfamily c, member 2	-1.507	Extracellular Space	growth factor
PRLR	prolactin receptor	1.792	Plasma Membrane	transmembrane receptor
PRRC2A	proline-rich coiled-coil 2A	-1.628	Cytoplasm	other
PSMB7	proteasome (prosome, macropain) subunit, beta type, 7	-1.596	Cytoplasm	peptidase
PSTPIP1	proline-serine-threonine phosphatase interacting protein 1	-1.502	Cytoplasm	other
PTCH2	patched 2	-1.905	Plasma Membrane	transmembrane receptor
PTPRJ	protein tyrosine phosphatase, receptor type, J	1.515	Plasma Membrane	phosphatase
PYCR1	pyrroline-5-carboxylate reductase 1	-2.037	Cytoplasm	enzyme
RAB11B	RAB11B, member RAS oncogene family	-2.375	Cytoplasm	enzyme
RAC3	ras-related C3 botulinum toxin substrate 3 (rho family, small GTP binding protein Rac3)	-1.493	Cytoplasm	enzyme
RAD54L2	RAD54-like 2 (S. cerevisiae)	1.525	Nucleus	transcription regulator
RADIL	Ras association and DIL domains	-74.658	Cytoplasm	other
RAI1	retinoic acid induced 1	1.573	Cytoplasm	other
RALGPS1	Ral GEF with PH domain and SH3 binding motif 1	1.694	Cytoplasm	other
RALY	RALY heterogeneous nuclear ribonucleoprotein	1.62	Nucleus	other
RAMP3	receptor (G protein-coupled) activity modifying protein 3	-1.798	Plasma Membrane	transporter
RANBP9	RAN binding protein 9	1.501	Nucleus	other
RANBP17	RAN binding protein 17	-1.496	Nucleus	transporter
RAPSN	receptor-associated protein of the synapse	-1.727	Plasma Membrane	other
RBM27	RNA binding motif protein 27	1.514	Nucleus	other
RBP3	retinol binding protein 3, interstitial	-2.287	Extracellular Space	transporter
RDH5	retinol dehydrogenase 5 (11-cis/9-cis)	1.605	Cytoplasm	enzyme
RDH12	retinol dehydrogenase 12 (all-trans/9-cis/11-cis)	-2.827	Cytoplasm	enzyme
REEP2	receptor accessory protein 2	-1.504	Plasma Membrane	other
REM1	RAS (RAD and GEM)-like GTP-binding 1	1.512	Other	enzyme
RFESD	Rieske (Fe-S) domain containing	-1.836	Other	other
RFX7	regulatory factor X, 7	1.509	Other	other
RGMB	repulsive guidance molecule family member b	-1.567	Plasma Membrane	other
RGS16	regulator of G-protein signaling 16	-1.688	Cytoplasm	other
RGS20	regulator of G-protein signaling 20	-1.955	Cytoplasm	other
RHBDF2	rhomboid 5 homolog 2 (Drosophila)	1.512	Cytoplasm	other
RHOBTB1	Rho-related BTB domain containing 1	-1.83	Other	enzyme
Rhox10	reproductive homeobox 10	-1.622	Other	other
Rhox6/Rhox9	reproductive homeobox 9	-158.215	Other	other
RHPN2	rhophilin, Rho GTPase binding protein 2	1.534	Cytoplasm	other
RNF41	ring finger protein 41, E3 ubiquitin protein ligase	1.594	Cytoplasm	enzyme
RNF123	ring finger protein 123	-1.649	Cytoplasm	other
RPH3A	rabphilin 3A	-1.553	Plasma Membrane	transporter
RPL26	ribosomal protein L26	-5.07	Cytoplasm	other
RPS6KA3	ribosomal protein S6 kinase, 90kDa, polypeptide 3	-62.985	Cytoplasm	kinase
RPUSD1	RNA pseudouridylate synthase domain containing 1	-1.51	Other	enzyme
RRP9	ribosomal RNA processing 9, small subunit (SSU) processome component, homolog (yeast)	-1.683	Nucleus	other
Rsrc2	arginine/serine-rich coiled-coil 2	1.621	Other	other
RXFP3	relaxin/insulin-like family peptide receptor 3	-1.632	Plasma Membrane	G-protein coupled receptor
S100A1	S100 calcium binding protein A1	-1.568	Cytoplasm	other
S100A8	S100 calcium binding protein A8	3.18	Cytoplasm	other
S100A9	S100 calcium binding protein A9	3.189	Cytoplasm	other
SCAF8	SR-related CTD-associated factor 8	-1.814	Nucleus	other
SCN8A	sodium channel, voltage gated, type VIII alpha subunit	-1.529	Plasma Membrane	ion channel
SCNN1A	sodium channel, non voltage gated 1 alpha subunit	1.512	Plasma Membrane	ion channel
SDAD1	SDA1 domain containing 1	1.812	Nucleus	other
SDR39U1	short chain dehydrogenase/reductase family 39U, member 1	-1.673	Nucleus	other
SEMA4G	sema domain, immunoglobulin domain (Ig), transmembrane domain (TM) and short cytoplasmic domain, (semaphorin) 4G	-1.628	Plasma Membrane	other
SEMA6B	sema domain, transmembrane domain (TM), and cytoplasmic domain, (semaphorin) 6B	-1.534	Plasma Membrane	other
SEMA6C	sema domain, transmembrane domain (TM), and cytoplasmic domain, (semaphorin) 6C	-1.655	Plasma Membrane	other
SERINC2	serine incorporator 2	-1.567	Plasma Membrane	transporter
SERPINA11	serpin peptidase inhibitor, clade A (alpha-1 antiproteinase, antitrypsin), member 11	-1.58	Extracellular Space	other
SERPINH1	serpin peptidase inhibitor, clade H (heat shock protein 47), member 1, (collagen binding protein 1)	1.789	Extracellular Space	other
Sf3a2	splicing factor 3a, subunit 2	-1.985	Nucleus	other
SFMBT1	Scm-like with four mbt domains 1	1.508	Nucleus	transcription regulator
SGK2	serum/glucocorticoid regulated kinase 2	2.571	Cytoplasm	kinase
SGSM3	small G protein signaling modulator 3	-2.132	Plasma Membrane	other
SHISA2	shisa family member 2	1.505	Other	other
Sik1	salt inducible kinase 1	1.53	Other	kinase
SIPA1L2	signal-induced proliferation-associated 1 like 2	1.732	Other	other
SIRT6	sirtuin 6	-1.565	Nucleus	enzyme
Six3os1	SIX homeobox 3, opposite strand 1	1.822	Other	other
Skint10 (includes others)	selection and upkeep of intraepithelial T cells 9	-1.593	Other	other
SLC18A3	solute carrier family 18 (vesicular acetylcholine transporter), member 3	-1.715	Plasma Membrane	transporter
SLC25A3	solute carrier family 25 (mitochondrial carrier; phosphate carrier), member 3	1.555	Cytoplasm	transporter
SLC25A18	solute carrier family 25 (glutamate carrier), member 18	-1.535	Cytoplasm	transporter
SLC25A23	solute carrier family 25 (mitochondrial carrier; phosphate carrier), member 23	-2.195	Cytoplasm	transporter
SLC25A40	solute carrier family 25, member 40	1.52	Cytoplasm	other
SLC27A3	solute carrier family 27 (fatty acid transporter), member 3	1.594	Cytoplasm	transporter
SLC35E1	solute carrier family 35, member E1	-2.493	Other	other
SLC38A4	solute carrier family 38, member 4	1.609	Plasma Membrane	transporter
SLC38A5	solute carrier family 38, member 5	1.579	Plasma Membrane	transporter
SLC38A7	solute carrier family 38, member 7	-1.516	Plasma Membrane	transporter
SLC39A4	solute carrier family 39 (zinc transporter), member 4	1.57	Plasma Membrane	transporter
SLC4A7	solute carrier family 4, sodium bicarbonate cotransporter, member 7	-2.206	Plasma Membrane	transporter
SLC4A9	solute carrier family 4, sodium bicarbonate cotransporter, member 9	-1.51	Plasma Membrane	transporter
SLC5A3	solute carrier family 5 (sodium/myo-inositol cotransporter), member 3	1.672	Plasma Membrane	transporter
SLC5A7	solute carrier family 5 (sodium/choline cotransporter), member 7	-1.524	Plasma Membrane	transporter
SLC5A8	solute carrier family 5 (sodium/monocarboxylate cotransporter), member 8	-4.037	Plasma Membrane	transporter
SLC9A3R1	solute carrier family 9, subfamily A (NHE3, cation proton antiporter 3), member 3 regulator 1	-1.527	Plasma Membrane	other
SLITRK6	SLIT and NTRK-like family, member 6	-1.659	Plasma Membrane	other
SLN	sarcolipin	1.554	Cytoplasm	other
SLPI	secretory leukocyte peptidase inhibitor	1.911	Cytoplasm	other
SMARCC1	SWI/SNF related, matrix associated, actin dependent regulator of chromatin, subfamily c, member 1	-2.165	Nucleus	transcription regulator
SNCB	synuclein, beta	-2.055	Cytoplasm	other
Snhg7os	small nucleolar RNA host gene 7, opposite strand	-1.69	Other	other
SNTB2	syntrophin, beta 2 (dystrophin-associated protein A1, 59kDa, basic component 2)	1.538	Plasma Membrane	other
SORBS3	sorbin and SH3 domain containing 3	-1.51	Cytoplasm	other
SOX10	SRY (sex determining region Y)-box 10	-1.776	Nucleus	transcription regulator
SOX13	SRY (sex determining region Y)-box 13	-1.535	Nucleus	transcription regulator
Sox2ot	SOX2 overlapping transcript (non-protein coding)	1.502	Other	other
SPON1	spondin 1, extracellular matrix protein	2.008	Extracellular Space	other
SQSTM1	sequestosome 1	-1.778	Cytoplasm	transcription regulator
SRGAP2	SLIT-ROBO Rho GTPase activating protein 2	-1.674	Cytoplasm	other
SRM	spermidine synthase	-1.595	Cytoplasm	enzyme
SRPRB	signal recognition particle receptor, B subunit	-1.619	Cytoplasm	other
SRPX2	sushi-repeat containing protein, X-linked 2	-2.663	Cytoplasm	other
SSBP4	single stranded DNA binding protein 4	-1.79	Nucleus	transcription regulator
SSH1	slingshot protein phosphatase 1	-67.404	Cytoplasm	phosphatase
SSTR5	somatostatin receptor 5	-2.48	Plasma Membrane	G-protein coupled receptor
STAM	signal transducing adaptor molecule (SH3 domain and ITAM motif) 1	1.53	Cytoplasm	other
STC1	stanniocalcin 1	-113.286	Extracellular Space	kinase
STEAP1	six transmembrane epithelial antigen of the prostate 1	1.606	Plasma Membrane	transporter
STEAP3	STEAP family member 3, metalloreductase	-2.104	Cytoplasm	transporter
STRAP	serine/threonine kinase receptor associated protein	1.559	Plasma Membrane	other
Sts	steroid sulfatase	-1.772	Cytoplasm	enzyme
STXBP5L	syntaxin binding protein 5-like	1.61	Cytoplasm	other
SUN5	Sad1 and UNC84 domain containing 5	-1.689	Other	other
SYCP1	synaptonemal complex protein 1	1.622	Nucleus	other
SYT3	synaptotagmin III	-1.84	Cytoplasm	transporter
SYT9	synaptotagmin IX	-2.166	Plasma Membrane	transporter
Tac4	tachykinin 4	-1.58	Other	other
TADA3	transcriptional adaptor 3	1.511	Nucleus	transcription regulator
TAF10	TAF10 RNA polymerase II, TATA box binding protein (TBP)-associated factor, 30kDa	-1.507	Nucleus	transcription regulator
TAGLN	transgelin	-2.153	Cytoplasm	other
TAOK2	TAO kinase 2	-1.934	Cytoplasm	kinase
Tas2r109	taste receptor, type 2, member 109	-1.647	Other	other
Tas2r113	taste receptor, type 2, member 113	-1.555	Other	other
TBC1D12	TBC1 domain family, member 12	-1.55	Extracellular Space	other
TBC1D20	TBC1 domain family, member 20	-1.67	Nucleus	other
TBC1D30	TBC1 domain family, member 30	-1.566	Cytoplasm	other
TBC1D22B	TBC1 domain family, member 22B	-1.686	Other	other
TCERG1L	transcription elongation regulator 1-like	1.586	Other	other
Tcp10a (includes others)	t-complex protein 10b	-1.682	Cytoplasm	enzyme
TEAD1	TEA domain family member 1 (SV40 transcriptional enhancer factor)	-1.532	Nucleus	transcription regulator
TERT	telomerase reverse transcriptase	-1.869	Nucleus	enzyme
TFPI	tissue factor pathway inhibitor (lipoprotein-associated coagulation inhibitor)	1.757	Extracellular Space	other
TFPT	TCF3 (E2A) fusion partner (in childhood Leukemia)	-1.523	Nucleus	other
TGFB1	transforming growth factor, beta 1	-1.697	Extracellular Space	growth factor
TGM3	transglutaminase 3	-1.825	Cytoplasm	enzyme
Tgtp1/Tgtp2	T cell specific GTPase 1	1.73	Other	enzyme
THOP1	thimet oligopeptidase 1	-1.54	Cytoplasm	peptidase
TIMD4	T-cell immunoglobulin and mucin domain containing 4	8.461	Plasma Membrane	other
TJP3	tight junction protein 3	1.532	Cytoplasm	other
TLE1	transducin-like enhancer of split 1 (E(sp1) homolog, Drosophila)	-1.863	Nucleus	transcription regulator
TLR1	toll-like receptor 1	-1.56	Plasma Membrane	transmembrane receptor
TLR7	toll-like receptor 7	-1.556	Plasma Membrane	transmembrane receptor
TM4SF5	transmembrane 4 L six family member 5	-1.749	Plasma Membrane	other
TMEM37	transmembrane protein 37	1.581	Plasma Membrane	ion channel
TMEM72	transmembrane protein 72	1.534	Other	other
TMEM108	transmembrane protein 108	1.592	Other	other
TMEM140	transmembrane protein 140	1.607	Other	other
TMEM145	transmembrane protein 145	1.531	Other	other
TMEM192	transmembrane protein 192	-1.566	Cytoplasm	other
TMEM198	transmembrane protein 198	-1.622	Other	other
TMEM215	transmembrane protein 215	-1.656	Other	other
TMEM106C	transmembrane protein 106C	-1.509	Other	other
TMEM161A	transmembrane protein 161A	-1.64	Other	other
TMEM184A	transmembrane protein 184A	1.553	Cytoplasm	other
TMIE	transmembrane inner ear	-1.614	Other	other
TMPRSS7	transmembrane protease, serine 7	-1.566	Plasma Membrane	peptidase
TMPRSS11A	transmembrane protease, serine 11A	1.622	Other	peptidase
Tmsb4x (includes others)	thymosin, beta 4, X chromosome	-26.731	Cytoplasm	other
TNFRSF18	tumor necrosis factor receptor superfamily, member 18	-1.581	Plasma Membrane	transmembrane receptor
TNFRSF25	tumor necrosis factor receptor superfamily, member 25	1.533	Plasma Membrane	transmembrane receptor
TNFRSF1A	tumor necrosis factor receptor superfamily, member 1A	-1.562	Plasma Membrane	transmembrane receptor
TNFSF12	tumor necrosis factor (ligand) superfamily, member 12	-1.632	Extracellular Space	cytokine
TNNI1	troponin I type 1 (skeletal, slow)	-1.633	Cytoplasm	other
TNNI2	troponin I type 2 (skeletal, fast)	3.275	Cytoplasm	enzyme
TNNT3	troponin T type 3 (skeletal, fast)	2.801	Cytoplasm	other
TOMM6	translocase of outer mitochondrial membrane 6 homolog (yeast)	-1.507	Cytoplasm	other
TOX4	TOX high mobility group box family member 4	-1.554	Nucleus	other
TP53RK	TP53 regulating kinase	-1.648	Nucleus	kinase
Tpm1	tropomyosin 1, alpha	-1.555	Plasma Membrane	other
TPST2	tyrosylprotein sulfotransferase 2	1.508	Cytoplasm	enzyme
TRAF4	TNF receptor-associated factor 4	1.573	Cytoplasm	other
TRAPPC9	trafficking protein particle complex 9	-1.781	Plasma Membrane	other
TREM1	triggering receptor expressed on myeloid cells 1	-1.712	Plasma Membrane	transmembrane receptor
TRIM3	tripartite motif containing 3	-1.616	Cytoplasm	enzyme
TRIM5	tripartite motif containing 5	1.533	Cytoplasm	enzyme
TRIM11	tripartite motif containing 11	1.543	Cytoplasm	enzyme
TRIM62	tripartite motif containing 62	-1.507	Cytoplasm	enzyme
TRIP13	thyroid hormone receptor interactor 13	1.653	Cytoplasm	transcription regulator
TRMT2B	tRNA methyltransferase 2 homolog B (S. cerevisiae)	1.51	Cytoplasm	enzyme
TRPM3	transient receptor potential cation channel, subfamily M, member 3	1.687	Plasma Membrane	ion channel
TSC22D4	TSC22 domain family, member 4	-1.613	Nucleus	transcription regulator
Tsga8	testis specific gene A8	-1.697	Other	other
TST	thiosulfate sulfurtransferase (rhodanese)	-1.749	Cytoplasm	enzyme
TTC5	tetratricopeptide repeat domain 5	1.538	Nucleus	other
TTLL2	tubulin tyrosine ligase-like family member 2	1.73	Other	other
TTN	titin	1.954	Cytoplasm	kinase
TUBA3E	tubulin, alpha 3e	-1.545	Cytoplasm	other
Ubap2l	ubiquitin-associated protein 2-like	-1.567	Other	other
UBL3	ubiquitin-like 3	-4.975	Cytoplasm	other
UBL7	ubiquitin-like 7	-1.642	Other	other
UBN1	ubinuclein 1	1.789	Nucleus	transcription regulator
UCP2	uncoupling protein 2 (mitochondrial, proton carrier)	-1.525	Cytoplasm	transporter
UGT2A3	UDP glucuronosyltransferase 2 family, polypeptide A3	-1.731	Other	enzyme
UPF1	UPF1 regulator of nonsense transcripts homolog (yeast)	-1.575	Nucleus	enzyme
USH1G	Usher syndrome 1G (autosomal recessive)	-1.836	Cytoplasm	other
USP8	ubiquitin specific peptidase 8	1.712	Cytoplasm	peptidase
VANGL1	VANGL planar cell polarity protein 1	-79.499	Cytoplasm	other
VAT1	vesicle amine transport 1	-1.739	Plasma Membrane	transporter
VAX2	ventral anterior homeobox 2	-1.532	Nucleus	transcription regulator
VGLL2	vestigial-like family member 2	1.605	Nucleus	transcription regulator
VILL	villin-like	2.345	Cytoplasm	other
Vmn1r70	vomeronasal 1 receptor 70	-1.606	Plasma Membrane	G-protein coupled receptor
Vmn1r49 (includes others)	vomeronasal 1, receptor 49	1.579	Plasma Membrane	G-protein coupled receptor
Vmn2r65	vomeronasal 2, receptor 65	1.665	Other	other
Vmn2r32 (includes others)	vomeronasal 2, receptor 32	1.511	Plasma Membrane	G-protein coupled receptor
Vmn2r88 (includes others)	vomeronasal 2, receptor 88	1.544	Other	other
VPREB1	pre-B lymphocyte 1	1.509	Plasma Membrane	other
VTI1A	vesicle transport through interaction with t-SNAREs 1A	2.128	Plasma Membrane	transporter
WARS2	tryptophanyl tRNA synthetase 2, mitochondrial	1.555	Cytoplasm	enzyme
WBSCR22	Williams Beuren syndrome chromosome region 22	1.574	Nucleus	enzyme
WDR6	WD repeat domain 6	-1.668	Cytoplasm	other
WDTC1	WD and tetratricopeptide repeats 1	-1.504	Other	other
WFDC2	WAP four-disulfide core domain 2	1.595	Extracellular Space	other
Wfdc3	WAP four-disulfide core domain 3	-3.306	Other	other
Wfdc13	WAP four-disulfide core domain 13	-2.061	Other	other
WFIKKN2	WAP, follistatin/kazal, immunoglobulin, kunitz and netrin domain containing 2	-1.499	Extracellular Space	other
WNT1	wingless-type MMTV integration site family, member 1	-1.699	Extracellular Space	cytokine
WNT16	wingless-type MMTV integration site family, member 16	-1.668	Extracellular Space	other
WNT9B	wingless-type MMTV integration site family, member 9B	-1.857	Extracellular Space	other
WSCD2	WSC domain containing 2	1.719	Other	other
WWOX	WW domain containing oxidoreductase	-1.666	Cytoplasm	enzyme
XPO4	exportin 4	3.353	Nucleus	transporter
YWHAB	tyrosine 3-monooxygenase/tryptophan 5-monooxygenase activation protein, beta	-1.581	Cytoplasm	transcription regulator
ZC3H3	zinc finger CCCH-type containing 3	1.56	Nucleus	other
ZCWPW2	zinc finger, CW type with PWWP domain 2	-14.353	Other	other
ZFP57	ZFP57 zinc finger protein	-1.778	Nucleus	transcription regulator
ZFP64	ZFP64 zinc finger protein	-114.437	Nucleus	other
ZFYVE28	zinc finger, FYVE domain containing 28	1.618	Cytoplasm	other
ZGLP1	zinc finger, GATA-like protein 1	-1.581	Nucleus	transcription regulator
ZIC1	Zic family member 1	-1.588	Nucleus	transcription regulator
ZMYM2	zinc finger, MYM-type 2	1.505	Nucleus	other
ZNF169	zinc finger protein 169	1.517	Nucleus	transcription regulator
ZNF282	zinc finger protein 282	-1.607	Nucleus	transcription regulator
ZNF362	zinc finger protein 362	1.517	Other	other
ZNF395	zinc finger protein 395	-1.5	Cytoplasm	other
ZNF488	zinc finger protein 488	-2.049	Nucleus	transcription regulator
ZNF503	zinc finger protein 503	1.543	Nucleus	other
ZNF560	zinc finger protein 560	1.74	Nucleus	transcription regulator
ZNF580	zinc finger protein 580	-1.615	Nucleus	other
ZNF692	zinc finger protein 692	-1.693	Other	other
ZNF790	zinc finger protein 790	1.56	Other	other
ZNF791	zinc finger protein 791	-1.537	Other	other
ZSCAN2	zinc finger and SCAN domain containing 2	-1.692	Nucleus	transcription regulator

## Sheet: Table S5
COMMON DEGs BETWEEN CORTEX AND HIPPOCAMPUS IN TGVD+ AT M9
Gene Symbol	Entrez Gene Name	FC Cortex	FC Hippocampus	Location	Type(s)
5031434O11Rik	RIKEN cDNA 5031434O11 gene	1.73	1.666	Other	other
A230065H16Rik	RIKEN cDNA A230065H16 gene	2.928	-2.644	Other	other
AHCY	adenosylhomocysteinase	2.071	1.794	Cytoplasm	enzyme
ALAS2	5'-aminolevulinate synthase 2	-1.81	-2.315	Cytoplasm	enzyme
AP4S1	adaptor-related protein complex 4, sigma 1 subunit	1.697	1.692	Cytoplasm	transporter
AQP1	aquaporin 1 (Colton blood group)	1.877	-2.69	Plasma Membrane	transporter
AQR	aquarius intron-binding spliceosomal factor	1.626	1.733	Nucleus	other
ARL15	ADP-ribosylation factor-like 15	1.544	2.025	Cytoplasm	other
ARL16	ADP-ribosylation factor-like 16	-1.743	-1.749	Other	other
ATG4C	autophagy related 4C, cysteine peptidase	4.817	4.494	Cytoplasm	peptidase
AVP	arginine vasopressin	3.958	1.73	Extracellular Space	other
AW112010	expressed sequence AW112010	-1.705	-1.593	Other	other
Bst2	bone marrow stromal cell antigen 2	-1.914	-2.067	Plasma Membrane	other
C10orf10	chromosome 10 open reading frame 10	2.1	1.95	Cytoplasm	other
C130078N14	uncharacterized protein C130078N14	2.767	3.922	Other	other
C19orf53	chromosome 19 open reading frame 53	1.735	1.811	Other	other
C1QB	complement component 1, q subcomponent, B chain	-1.589	-1.613	Extracellular Space	other
C1QC	complement component 1, q subcomponent, C chain	-1.502	-1.517	Extracellular Space	other
C330021F23Rik/Gm5148	RIKEN cDNA C330021F23 gene	2.035	1.72	Other	other
CACNG1	calcium channel, voltage-dependent, gamma subunit 1	-1.61	-1.604	Plasma Membrane	ion channel
CALCB	calcitonin-related polypeptide beta	1.931	1.827	Extracellular Space	other
CALML4	calmodulin-like 4	1.588	-2.58	Other	other
Ccl2	chemokine (C-C motif) ligand 2	-1.509	-1.627	Extracellular Space	cytokine
CCL2	chemokine (C-C motif) ligand 2	-1.545	-1.744	Extracellular Space	cytokine
Ccl6	chemokine (C-C motif) ligand 6	-1.582	-1.59	Extracellular Space	cytokine
CCL17	chemokine (C-C motif) ligand 17	1.783	1.762	Extracellular Space	cytokine
Cd52	CD52 antigen	-1.699	-1.517	Cytoplasm	other
CD68	CD68 molecule	-1.662	-1.504	Plasma Membrane	other
CD72	CD72 molecule	-2.235	-1.812	Plasma Membrane	transmembrane receptor
CD74	CD74 molecule, major histocompatibility complex, class II invariant chain	-2.415	-2.682	Plasma Membrane	transmembrane receptor
CDK5RAP1	CDK5 regulatory subunit associated protein 1	2.924	2.661	Extracellular Space	other
CGA	glycoprotein hormones, alpha polypeptide	3.428	2.937	Extracellular Space	other
CLEC7A	C-type lectin domain family 7, member A	-3.062	-2.403	Plasma Membrane	transmembrane receptor
CPNE1	copine I	1.705	1.599	Nucleus	transporter
CSHL1	chorionic somatomammotropin hormone-like 1	4.619	4.814	Nucleus	transcription regulator
Ctla2a/Ctla2b	cytotoxic T lymphocyte-associated protein 2 alpha	1.613	1.615	Plasma Membrane	other
CYP2F1	cytochrome P450, family 2, subfamily F, polypeptide 1	-1.841	1.75	Cytoplasm	enzyme
D630033O11Rik	RIKEN cDNA D630033O11 gene	1.809	2.041	Other	other
DCXR	dicarbonyl/L-xylulose reductase	-2.378	-2.807	Cytoplasm	enzyme
DNAJB8	DnaJ (Hsp40) homolog, subfamily B, member 8	-1.732	-1.916	Other	other
DTL	denticleless E3 ubiquitin protein ligase homolog (Drosophila)	1.73	1.539	Nucleus	other
E130116L18Rik	RIKEN cDNA E130116L18 gene	-1.832	-1.714	Other	other
EGR1	early growth response 1	-1.533	1.524	Nucleus	transcription regulator
FAM205A	family with sequence similarity 205, member A	-1.553	1.607	Nucleus	other
FAM32A	family with sequence similarity 32, member A	1.657	1.552	Nucleus	other
FAM71E1	family with sequence similarity 71, member E1	2.084	1.814	Other	other
FKBP1A	FK506 binding protein 1A, 12kDa	-1.519	-1.72	Cytoplasm	enzyme
FMO2	flavin containing monooxygenase 2 (non-functional)	-1.776	-1.516	Cytoplasm	enzyme
FOS	FBJ murine osteosarcoma viral oncogene homolog	-1.526	1.59	Nucleus	transcription regulator
FOXO3	forkhead box O3	-1.52	2.203	Nucleus	transcription regulator
GAL	galanin/GMAP prepropeptide	1.712	1.513	Extracellular Space	other
GALK2	galactokinase 2	1.739	1.699	Cytoplasm	kinase
GBP2	guanylate binding protein 2, interferon-inducible	-2.74	-2.563	Cytoplasm	enzyme
GBP4	guanylate binding protein 4	-1.98	-2.011	Cytoplasm	enzyme
GBP5	guanylate binding protein 5	-3.117	-2.043	Plasma Membrane	enzyme
GBP6	guanylate binding protein family, member 6	-3.234	-2.654	Cytoplasm	enzyme
GBP7	guanylate binding protein 7	-1.675	-1.688	Cytoplasm	enzyme
GCNT1	glucosaminyl (N-acetyl) transferase 1, core 2	-1.514	-1.974	Cytoplasm	enzyme
Gm807	predicted gene 807	-2.322	-3.425	Other	other
Gm3515	predicted gene 3515	2.659	1.979	Other	other
Gm4924	predicted gene 4924	1.53	2.142	Cytoplasm	other
Gm4951	predicted gene 4951	-1.559	-1.668	Other	other
Gm10516	predicted gene 10516	1.501	1.603	Other	other
GPAT2	glycerol-3-phosphate acyltransferase 2, mitochondrial	-1.682	1.585	Cytoplasm	enzyme
GPNMB	glycoprotein (transmembrane) nmb	2.584	1.771	Plasma Membrane	enzyme
GPR101	G protein-coupled receptor 101	2.718	1.584	Plasma Membrane	G-protein coupled receptor
GUSB	glucuronidase, beta	-1.51	-1.513	Cytoplasm	enzyme
H2-K2/H2-Q9	histocompatibility 2, K region locus 2	-1.522	-1.734	Plasma Membrane	other
H2-M2	histocompatibility 2, M region locus 2	-1.72	-1.768	Plasma Membrane	other
H2-Q5	histocompatibility 2, Q region locus 5	-1.612	-1.741	Other	other
H2-T9	histocompatibility 2, T region locus 9	-1.527	-2.343	Other	other
HBA1/HBA2	hemoglobin, alpha 1	-1.6	-2.307	Extracellular Space	transporter
Hbb-b1	hemoglobin, beta adult major chain	-1.78	-2.326	Extracellular Space	transporter
Hbb-b2	hemoglobin, beta adult minor chain	-1.609	-2.911	Other	other
HEBP1	heme binding protein 1	-1.53	-1.627	Cytoplasm	other
HLA-A	major histocompatibility complex, class I, A	-1.759	-1.969	Plasma Membrane	other
HLA-DQA1	major histocompatibility complex, class II, DQ alpha 1	-1.853	-2.32	Plasma Membrane	transmembrane receptor
HLA-DQB1	major histocompatibility complex, class II, DQ beta 1	-2.385	-2.743	Plasma Membrane	other
HLA-DRB5	major histocompatibility complex, class II, DR beta 5	-2.336	-2.526	Plasma Membrane	transmembrane receptor
HLA-E	major histocompatibility complex, class I, E	-1.75	-1.993	Plasma Membrane	transmembrane receptor
HLA-F	major histocompatibility complex, class I, F	-1.734	-1.947	Plasma Membrane	transmembrane receptor
HSPB3	heat shock 27kDa protein 3	2.424	2.459	Cytoplasm	other
ID1	inhibitor of DNA binding 1, dominant negative helix-loop-helix protein	1.515	1.537	Nucleus	transcription regulator
IER5	immediate early response 5	1.674	1.765	Other	other
IFI16	interferon, gamma-inducible protein 16	-2.27	-1.494	Nucleus	transcription regulator
Ifi47	interferon gamma inducible protein 47	-2.393	-1.765	Cytoplasm	other
IGKC	immunoglobulin kappa constant	-1.979	-8.888	Extracellular Space	other
Igtp	interferon gamma induced GTPase	-2.292	-2.362	Cytoplasm	enzyme
Iigp1	interferon inducible GTPase 1	-1.744	-1.912	Other	enzyme
Iqcf4	IQ motif containing F4	-1.733	-1.544	Other	other
IQSEC3	IQ motif and Sec7 domain 3	1.575	-3.299	Cytoplasm	other
IRGM	immunity-related GTPase family, M	-2.021	-2.279	Cytoplasm	enzyme
KCNJ6	potassium channel, inwardly rectifying subfamily J, member 6	-1.666	-1.793	Plasma Membrane	ion channel
KDM5A	lysine (K)-specific demethylase 5A	-1.755	-1.811	Nucleus	transcription regulator
KDR	kinase insert domain receptor	-1.643	1.528	Plasma Membrane	kinase
KLK6	kallikrein-related peptidase 6	-2.031	-1.774	Extracellular Space	peptidase
KRT18	keratin 18, type I	1.592	-1.972	Cytoplasm	other
LAMC2	laminin, gamma 2	2.083	1.568	Extracellular Space	other
LCN2	lipocalin 2	2.697	1.531	Extracellular Space	transporter
LGR5	leucine-rich repeat containing G protein-coupled receptor 5	1.511	1.505	Plasma Membrane	transmembrane receptor
LOC285423	uncharacterized LOC285423	-1.981	-1.63	Other	other
LOC648044	guanine nucleotide binding protein (G protein), gamma 12-like	1.723	4.145	Other	other
LRIG1	leucine-rich repeats and immunoglobulin-like domains 1	-4.912	-4.059	Extracellular Space	other
LRRIQ4	leucine-rich repeats and IQ motif containing 4	-1.615	-1.549	Other	other
LRRTM4	leucine rich repeat transmembrane neuronal 4	-1.952	-2.131	Extracellular Space	other
MALL	mal, T-cell differentiation protein-like	1.785	1.895	Plasma Membrane	other
Mirg	miRNA containing gene	-1.682	-3.412	Other	other
NANOG	Nanog homeobox	-1.659	-1.516	Nucleus	transcription regulator
Nat8b	N-acetyltransferase 8B	2.409	2.033	Other	other
NINJ2	ninjurin 2	-1.738	-1.99	Plasma Membrane	other
NLRC5	NLR family, CARD domain containing 5	-1.591	-1.595	Cytoplasm	transcription regulator
NR5A2	nuclear receptor subfamily 5, group A, member 2	1.871	1.788	Nucleus	ligand-dependent nuclear receptor
NTNG1	netrin G1	1.666	1.587	Extracellular Space	other
NTS	neurotensin	2.377	1.585	Extracellular Space	other
OAS1	2'-5'-oligoadenylate synthetase 1, 40/46kDa	-1.614	-1.627	Cytoplasm	enzyme
OCEL1	occludin/ELL domain containing 1	3.214	3.522	Other	other
OMP	olfactory marker protein	1.655	3.175	Cytoplasm	other
OTX2	orthodenticle homeobox 2	1.664	-2.253	Nucleus	transcription regulator
OXT	oxytocin/neurophysin I prepropeptide	4.737	2.034	Extracellular Space	other
PALMD	palmdelphin	1.629	1.538	Cytoplasm	other
PLA2G4E	phospholipase A2, group IVE	-1.589	-1.937	Cytoplasm	enzyme
POMC	proopiomelanocortin	3.744	3.408	Extracellular Space	other
PPP1R16B	protein phosphatase 1, regulatory subunit 16B	-1.776	-1.779	Plasma Membrane	phosphatase
PRDM12	PR domain containing 12	-2.835	-1.883	Nucleus	other
PRKCD	protein kinase C, delta	1.653	1.837	Cytoplasm	kinase
PRL	prolactin	10.541	10.069	Extracellular Space	cytokine
PRLR	prolactin receptor	2.204	-2.359	Plasma Membrane	transmembrane receptor
PROKR2	prokineticin receptor 2	2.102	1.612	Plasma Membrane	G-protein coupled receptor
RBM47	RNA binding motif protein 47	-1.585	-1.647	Nucleus	other
RET	ret proto-oncogene	1.646	1.678	Plasma Membrane	kinase
RIMS3	regulating synaptic membrane exocytosis 3	-2.229	1.607	Plasma Membrane	other
RINT1	RAD50 interactor 1	1.671	1.943	Nucleus	other
RNASE4	ribonuclease, RNase A family, 4	-2.065	-2.142	Extracellular Space	enzyme
RNASEH2A	ribonuclease H2, subunit A	-1.781	-1.711	Nucleus	enzyme
RPL17	ribosomal protein L17	1.99	3.318	Cytoplasm	other
RSPO1	R-spondin 1	-1.599	1.565	Plasma Membrane	other
S100A5	S100 calcium binding protein A5	2.193	3.085	Nucleus	other
SCGB3A1	secretoglobin, family 3A, member 1	1.75	1.687	Extracellular Space	cytokine
SCUBE2	signal peptide, CUB domain, EGF-like 2	1.693	1.605	Extracellular Space	other
SDC4	syndecan 4	-1.805	-1.906	Plasma Membrane	other
SERPINA1	serpin peptidase inhibitor, clade A (alpha-1 antiproteinase, antitrypsin), member 1	2.118	-2.257	Extracellular Space	other
Serpina3g (includes others)	serine (or cysteine) peptidase inhibitor, clade A, member 3G	-2.421	-1.798	Other	other
SLC25A34	solute carrier family 25, member 34	1.694	1.644	Cytoplasm	other
SLN	sarcolipin	1.89	-2.547	Cytoplasm	other
STRAP	serine/threonine kinase receptor associated protein	-1.563	-1.696	Plasma Membrane	other
TAC3	tachykinin 3	1.581	2.254	Extracellular Space	other
TBXAS1	thromboxane A synthase 1 (platelet)	-2.084	-1.579	Plasma Membrane	enzyme
Tgtp1/Tgtp2	T cell specific GTPase 1	-5.213	-4.159	Other	enzyme
TIMM9	translocase of inner mitochondrial membrane 9 homolog (yeast)	1.668	1.965	Cytoplasm	transporter
TOMM22	translocase of outer mitochondrial membrane 22 homolog (yeast)	1.628	1.619	Cytoplasm	transporter
TRMT1	tRNA methyltransferase 1 homolog (S. cerevisiae)	-1.695	-1.544	Extracellular Space	enzyme
TSPAN18	tetraspanin 18	2.141	-1.916	Other	other
UPK1B	uroplakin 1B	-1.609	-4.861	Plasma Membrane	other
VILL	villin-like	-2.687	-3.056	Cytoplasm	other
VIPR2	vasoactive intestinal peptide receptor 2	1.774	2.339	Plasma Membrane	G-protein coupled receptor
VSIG8	V-set and immunoglobulin domain containing 8	1.656	1.811	Other	other
VTI1A	vesicle transport through interaction with t-SNAREs 1A	-1.528	-1.594	Plasma Membrane	transporter
WDR86	WD repeat domain 86	1.709	-2.751	Other	other
Wfdc13	WAP four-disulfide core domain 13	1.764	1.846	Other	other
WIF1	WNT inhibitory factor 1	1.79	2.068	Extracellular Space	other
XDH	xanthine dehydrogenase	-1.794	-1.965	Cytoplasm	enzyme
ZBP1	Z-DNA binding protein 1	-1.693	-1.692	Cytoplasm	other
ZBTB44	zinc finger and BTB domain containing 44	-9.75	-8.726	Other	other
Zfp961	zinc finger protein 961	1.795	1.805	Other	other
ZNF669	zinc finger protein 669	2.197	1.839	Other	other

## Sheet: Table S6
SPECIFIC DEGs FOR CORTEX IN TGVD+ AT M9
Gene Symbol	Entrez Gene Name	FC Cortex	Location	Type(s)
1700018B24Rik	enhancer of rudimentary homolog pseudogene	-2.402	Other	other
1700026J12Rik	RIKEN cDNA 1700026J12 gene	-11.67	Other	other
1700062C10Rik	RIKEN cDNA 1700062C10 gene	2.114	Other	other
1810053B23Rik	RIKEN cDNA 1810053B23 gene	-1.826	Other	other
2610318N02Rik	RIKEN cDNA 2610318N02 gene	-2.352	Other	other
2810405F15Rik	RIKEN cDNA 2810405F15 gene	1.826	Other	other
2810416G20Rik	RIKEN cDNA 2810416G20 gene	1.556	Other	other
2900001G08Rik	RIKEN cDNA 2900001G08 gene	1.873	Other	other
3110070M22Rik	RIKEN cDNA 3110070M22 gene	1.592	Other	other
4930449A18Rik	RIKEN cDNA 4930449A18 gene	-1.707	Other	other
4930471E19Rik	RIKEN cDNA 4930471E19 gene	-1.831	Other	other
4930557A04Rik	RIKEN cDNA 4930557A04 gene	-3.114	Other	other
4930563F15Rik	RIKEN cDNA 4930563F15 gene	-1.775	Other	other
4930581F22Rik	RIKEN cDNA 4930581F22 gene	-2.143	Other	other
4931406H21Rik	RIKEN cDNA 4931406H21 gene	-1.67	Other	other
4933404G15Rik	RIKEN cDNA 4933404G15 gene	-2.188	Other	other
4933405E24Rik	RIKEN cDNA 4933405E24 gene	-1.56	Other	other
4933409K07Rik	RIKEN cDNA 4933409K07 gene	-1.54	Other	other
4933428M09Rik	RIKEN cDNA 4933428M09 gene	-1.621	Other	other
5033417F24Rik	RIKEN cDNA 5033417F24 gene	1.698	Other	other
5730419F03Rik	RIKEN cDNA 5730419F03 gene	-1.564	Other	other
5830408C22Rik	RIKEN cDNA 5830408C22 gene	1.654	Other	other
6430628N08Rik	RIKEN cDNA 6430628N08 gene	2.143	Other	other
8030411F24Rik	RIKEN cDNA 8030411F24 gene	1.695	Other	other
9330199F22Rik	RIKEN cDNA 9330199F22 gene	1.56	Other	other
A330049N07Rik	RIKEN cDNA A330049N07 gene	-1.549	Other	other
A830019P07Rik	RIKEN cDNA A830019P07 gene	2.667	Other	other
A930018M24Rik	RIKEN cDNA A930018M24 gene	-1.664	Other	other
AA465934	expressed sequence AA465934	-2.715	Other	other
ACAT2	acetyl-CoA acetyltransferase 2	-1.568	Cytoplasm	enzyme
Acp5	acid phosphatase 5, tartrate resistant	1.607	Cytoplasm	phosphatase
ACTA2	actin, alpha 2, smooth muscle, aorta	2.049	Cytoplasm	other
ADAMTS8	ADAM metallopeptidase with thrombospondin type 1 motif, 8	1.567	Extracellular Space	peptidase
ADCY5	adenylate cyclase 5	-1.807	Plasma Membrane	enzyme
ADCYAP1	adenylate cyclase activating polypeptide 1 (pituitary)	1.64	Extracellular Space	other
ADORA2A	adenosine A2a receptor	-2.498	Plasma Membrane	G-protein coupled receptor
ADRB3	adrenoceptor beta 3	1.57	Plasma Membrane	G-protein coupled receptor
AGRP	agouti related neuropeptide	3.8	Extracellular Space	other
AGT	angiotensinogen (serpin peptidase inhibitor, clade A, member 8)	1.642	Extracellular Space	growth factor
AHI1	Abelson helper integration site 1	1.595	Cytoplasm	other
Ahsp	alpha hemoglobin stabilizing protein	-1.786	Cytoplasm	other
AI852580	expressed sequence AI852580	-3.72	Other	other
AKR1C3	aldo-keto reductase family 1, member C3	-1.592	Cytoplasm	enzyme
ALDH1A2	aldehyde dehydrogenase 1 family, member A2	2.058	Cytoplasm	enzyme
ALDH1A3	aldehyde dehydrogenase 1 family, member A3	1.503	Cytoplasm	enzyme
Aldh1a7	aldehyde dehydrogenase family 1, subfamily A7	1.71	Cytoplasm	enzyme
Aldh3b2	aldehyde dehydrogenase 3 family, member B2	2.079	Other	other
AMN	amnion associated transmembrane protein	1.566	Plasma Membrane	other
AMY2B	amylase, alpha 2B (pancreatic)	1.634	Extracellular Space	enzyme
ANGPT2	angiopoietin 2	1.897	Extracellular Space	growth factor
ANGPTL4	angiopoietin-like 4	1.598	Extracellular Space	other
ANK3	ankyrin 3, node of Ranvier (ankyrin G)	-1.617	Plasma Membrane	other
ANKK1	ankyrin repeat and kinase domain containing 1	-1.821	Cytoplasm	kinase
ANKRD13A	ankyrin repeat domain 13A	-1.535	Plasma Membrane	other
ANKRD33B	ankyrin repeat domain 33B	-1.691	Other	other
ANTXRL	anthrax toxin receptor-like	-1.496	Other	other
ANXA1	annexin A1	1.592	Plasma Membrane	enzyme
ANXA8/ANXA8L1	annexin A8-like 1	1.667	Plasma Membrane	other
Apol10a (includes others)	apolipoprotein L 11a	-1.791	Other	other
ARC	activity-regulated cytoskeleton-associated protein	-2.146	Cytoplasm	other
ARHGAP6	Rho GTPase activating protein 6	1.902	Cytoplasm	other
ARHGAP36	Rho GTPase activating protein 36	3.642	Cytoplasm	other
ARL5C	ADP-ribosylation factor-like 5C	-1.795	Other	other
ASB4	ankyrin repeat and SOCS box containing 4	2.319	Nucleus	transcription regulator
ASCC2	activating signal cointegrator 1 complex subunit 2	-1.625	Nucleus	other
ASGR1	asialoglycoprotein receptor 1	1.844	Plasma Membrane	transmembrane receptor
ATP8B4	ATPase, class I, type 8B, member 4	-7.001	Other	transporter
AU018091	expressed sequence AU018091	-2.255	Other	other
AU042410	expressed sequence AU042410	-4.158	Other	other
AW551984	expressed sequence AW551984	2.254	Other	other
AXIN2	axin 2	-2.083	Cytoplasm	other
B130024G19Rik	RIKEN cDNA B130024G19 gene	1.565	Other	other
BAIAP3	BAI1-associated protein 3	1.672	Extracellular Space	other
BATF2	basic leucine zipper transcription factor, ATF-like 2	-1.752	Other	other
BATF3	basic leucine zipper transcription factor, ATF-like 3	1.599	Nucleus	transcription regulator
BC021767	cingulin pseudogene	1.597	Other	other
BC037156	cDNA sequence BC037156	1.659	Other	other
BCAT2	branched chain amino-acid transaminase 2, mitochondrial	1.569	Cytoplasm	enzyme
BDP1	B double prime 1, subunit of RNA polymerase III transcription initiation factor IIIB	-1.545	Nucleus	transcription regulator
BGLAP	bone gamma-carboxyglutamate (gla) protein	-1.619	Extracellular Space	other
Bhlhe41	basic helix-loop-helix family, member e41	-1.741	Nucleus	transcription regulator
C030006F08Rik	RIKEN cDNA C030006F08 gene	-2.906	Other	other
C11orf63	chromosome 11 open reading frame 63	1.576	Other	other
C11orf70	chromosome 11 open reading frame 70	-1.507	Other	other
C11orf87	chromosome 11 open reading frame 87	-1.544	Other	other
C130026L21Rik	RIKEN cDNA C130026L21 gene	1.522	Other	other
C1orf168	chromosome 1 open reading frame 168	1.62	Other	other
C1QL3	complement component 1, q subcomponent-like 3	1.583	Extracellular Space	other
C230034O21Rik	RIKEN cDNA C230034O21 gene	1.596	Other	other
C330020G15Rik	RIKEN cDNA C330020G15 gene	-1.555	Other	other
C9orf91	chromosome 9 open reading frame 91	-1.757	Cytoplasm	other
CA8	carbonic anhydrase VIII	-1.808	Cytoplasm	enzyme
CABP5	calcium binding protein 5	-1.616	Cytoplasm	other
CACNG5	calcium channel, voltage-dependent, gamma subunit 5	1.591	Plasma Membrane	ion channel
CALCR	calcitonin receptor	2.425	Plasma Membrane	G-protein coupled receptor
CAMP	cathelicidin antimicrobial peptide	-1.983	Cytoplasm	other
CAPN11	calpain 11	-1.662	Cytoplasm	peptidase
CAPSL	calcyphosine-like	2.075	Other	other
CCDC3	coiled-coil domain containing 3	1.515	Cytoplasm	other
CCDC160	coiled-coil domain containing 160	1.51	Other	other
CCL4	chemokine (C-C motif) ligand 4	-1.875	Extracellular Space	cytokine
CD4	CD4 molecule	-1.555	Plasma Membrane	transmembrane receptor
CD93	CD93 molecule	1.519	Plasma Membrane	other
CD274	CD274 molecule	-1.722	Plasma Membrane	enzyme
CD300LF	CD300 molecule-like family member f	-2.536	Plasma Membrane	other
CD40LG	CD40 ligand	-1.792	Extracellular Space	cytokine
CDC42BPG	CDC42 binding protein kinase gamma (DMPK-like)	-1.659	Cytoplasm	kinase
CDH1	cadherin 1, type 1, E-cadherin (epithelial)	1.726	Plasma Membrane	other
CDHR1	cadherin-related family member 1	2.684	Plasma Membrane	other
CDKAL1	CDK5 regulatory subunit associated protein 1-like 1	-1.616	Cytoplasm	other
Celf6	CUGBP, Elav-like family member 6	1.554	Cytoplasm	other
CGN	cingulin	1.676	Plasma Membrane	other
CH25H	cholesterol 25-hydroxylase	-1.518	Cytoplasm	enzyme
CHCHD4	coiled-coil-helix-coiled-coil-helix domain containing 4	1.612	Cytoplasm	enzyme
CHRDL1	chordin-like 1	-1.503	Extracellular Space	other
CHST8	carbohydrate (N-acetylgalactosamine 4-0) sulfotransferase 8	1.564	Cytoplasm	enzyme
CIDEA	cell death-inducing DFFA-like effector a	1.743	Cytoplasm	other
CLCA2	chloride channel accessory 2	1.693	Plasma Membrane	ion channel
CLCNKB	chloride channel, voltage-sensitive Kb	1.83	Plasma Membrane	ion channel
CLDN4	claudin 4	-2.573	Plasma Membrane	transmembrane receptor
CLEC4C	C-type lectin domain family 4, member C	-1.9	Plasma Membrane	other
CNN1	calponin 1, basic, smooth muscle	2.429	Cytoplasm	other
CNNM3	cyclin and CBS domain divalent metal cation transport mediator 3	-1.495	Other	other
COL4A1	collagen, type IV, alpha 1	1.512	Extracellular Space	other
CPNE2	copine II	1.778	Cytoplasm	other
CPNE7	copine VII	2.203	Cytoplasm	transporter
CPNE9	copine family member IX	-1.736	Extracellular Space	other
CPPED1	calcineurin-like phosphoesterase domain containing 1	-1.576	Cytoplasm	enzyme
CRIM1	cysteine rich transmembrane BMP regulator 1 (chordin-like)	1.543	Extracellular Space	kinase
CRLF1	cytokine receptor-like factor 1	1.873	Extracellular Space	other
CRTAC1	cartilage acidic protein 1	1.582	Extracellular Space	other
CRYBA1	crystallin, beta A1	-1.523	Other	other
CRYBA2	crystallin, beta A2	-1.507	Other	other
CRYM	crystallin, mu	1.781	Cytoplasm	enzyme
CSF2	colony stimulating factor 2 (granulocyte-macrophage)	-3.468	Extracellular Space	cytokine
CUEDC1	CUE domain containing 1	1.811	Other	other
Cux1	cut-like homeobox 1	-1.569	Nucleus	other
CWC22	CWC22 spliceosome-associated protein	-1.76	Nucleus	other
CXCL10	chemokine (C-X-C motif) ligand 10	-1.919	Extracellular Space	cytokine
CYP17A1	cytochrome P450, family 17, subfamily A, polypeptide 1	-2.117	Cytoplasm	enzyme
CYP1B1	cytochrome P450, family 1, subfamily B, polypeptide 1	1.652	Cytoplasm	enzyme
CYP26B1	cytochrome P450, family 26, subfamily B, polypeptide 1	1.512	Cytoplasm	enzyme
CYP39A1	cytochrome P450, family 39, subfamily A, polypeptide 1	-2.005	Cytoplasm	enzyme
DBH	dopamine beta-hydroxylase (dopamine beta-monooxygenase)	1.545	Cytoplasm	enzyme
DCAF12L2	DDB1 and CUL4 associated factor 12-like 2	-1.567	Other	other
DCN	decorin	1.977	Extracellular Space	other
DCT	dopachrome tautomerase	1.568	Cytoplasm	enzyme
DDX4	DEAD (Asp-Glu-Ala-Asp) box polypeptide 4	1.594	Nucleus	enzyme
DENND4A	DENN/MADD domain containing 4A	-1.681	Nucleus	other
DERA	deoxyribose-phosphate aldolase (putative)	2.052	Cytoplasm	enzyme
DERL3	derlin 3	1.665	Cytoplasm	other
DIO3	deiodinase, iodothyronine, type III	1.81	Plasma Membrane	enzyme
DISP2	dispatched homolog 2 (Drosophila)	1.595	Plasma Membrane	other
DLK1	delta-like 1 homolog (Drosophila)	3.226	Extracellular Space	other
DLL3	delta-like 3 (Drosophila)	1.674	Extracellular Space	other
DMKN	dermokine	-2.182	Extracellular Space	other
DNM2	dynamin 2	-1.727	Plasma Membrane	enzyme
Doc2g	double C2, gamma	1.789	Nucleus	other
DPH5	diphthamide biosynthesis 5	1.516	Cytoplasm	enzyme
DUSP1	dual specificity phosphatase 1	-1.528	Nucleus	phosphatase
DVL3	dishevelled segment polarity protein 3	-1.761	Cytoplasm	other
DYSF	dysferlin	1.662	Plasma Membrane	other
E330016L19Rik	RIKEN cDNA E330016L19 gene	-2.363	Other	other
E4F1	E4F transcription factor 1	-1.569	Nucleus	transcription regulator
EBF2	early B-cell factor 2	1.69	Nucleus	other
ECEL1	endothelin converting enzyme-like 1	1.517	Plasma Membrane	peptidase
EDN3	endothelin 3	-1.688	Extracellular Space	other
EGF	epidermal growth factor	1.537	Extracellular Space	growth factor
ELF4	E74-like factor 4 (ets domain transcription factor)	-1.502	Nucleus	transcription regulator
ELK3	ELK3, ETS-domain protein (SRF accessory protein 2)	-2.027	Nucleus	transcription regulator
EOMES	eomesodermin	1.564	Nucleus	transcription regulator
ESR1	estrogen receptor 1	1.678	Nucleus	ligand-dependent nuclear receptor
ESRP1	epithelial splicing regulatory protein 1	-2.164	Nucleus	other
ESYT3	extended synaptotagmin-like protein 3	1.503	Plasma Membrane	other
ETNK1	ethanolamine kinase 1	-1.652	Cytoplasm	kinase
EXD1	exonuclease 3'-5' domain containing 1	-1.635	Other	other
EYA2	EYA transcriptional coactivator and phosphatase 2	1.553	Nucleus	phosphatase
FAM150B	family with sequence similarity 150, member B	1.764	Other	other
FAM160B2	family with sequence similarity 160, member B2	1.636	Other	other
FAM179A	family with sequence similarity 179, member A	1.512	Other	other
Fam183b	family with sequence similarity 183, member B	1.558	Other	other
FAM196B	family with sequence similarity 196, member B	1.753	Other	other
FAM26F	family with sequence similarity 26, member F	-3.895	Other	other
FAM43A	family with sequence similarity 43, member A	-1.66	Other	other
FAM46C	family with sequence similarity 46, member C	-1.71	Extracellular Space	other
FAM47E	family with sequence similarity 47, member E	-5.034	Other	other
FAM60A	family with sequence similarity 60, member A	-1.529	Extracellular Space	other
FBLN1	fibulin 1	1.808	Extracellular Space	other
FERMT1	fermitin family member 1	2.071	Plasma Membrane	other
FEZF1	FEZ family zinc finger 1	1.567	Other	other
FGF10	fibroblast growth factor 10	1.697	Extracellular Space	growth factor
FGF13	fibroblast growth factor 13	-1.53	Extracellular Space	growth factor
FHAD1	forkhead-associated (FHA) phosphopeptide binding domain 1	1.602	Other	other
FIBCD1	fibrinogen C domain containing 1	1.778	Other	other
FIBIN	fin bud initiation factor homolog (zebrafish)	1.677	Cytoplasm	other
FIGF	c-fos induced growth factor (vascular endothelial growth factor D)	1.534	Extracellular Space	growth factor
FMN1	formin 1	-1.991	Nucleus	other
FMNL2	formin-like 2	-1.495	Cytoplasm	other
Fmr1nb	fragile X mental retardation 1 neighbor	-1.582	Other	other
FNBP1	formin binding protein 1	-1.635	Nucleus	enzyme
FOXC1	forkhead box C1	1.641	Nucleus	transcription regulator
Foxp1	forkhead box P1	-1.719	Nucleus	transcription regulator
FREM3	FRAS1 related extracellular matrix 3	2.103	Extracellular Space	other
FRMD4A	FERM domain containing 4A	-1.641	Plasma Membrane	other
FSTL5	follistatin-like 5	1.977	Extracellular Space	other
FUT7	fucosyltransferase 7 (alpha (1,3) fucosyltransferase)	-2.419	Cytoplasm	enzyme
GABRA5	gamma-aminobutyric acid (GABA) A receptor, alpha 5	1.684	Plasma Membrane	ion channel
GABRG1	gamma-aminobutyric acid (GABA) A receptor, gamma 1	1.736	Plasma Membrane	ion channel
GAS1	growth arrest-specific 1	-1.578	Plasma Membrane	other
GDF11	growth differentiation factor 11	-1.99	Extracellular Space	growth factor
GGT1	gamma-glutamyltransferase 1	-6.393	Plasma Membrane	enzyme
GHRH	growth hormone releasing hormone	1.665	Extracellular Space	other
GIMAP8	GTPase, IMAP family member 8	-5.967	Other	other
GJB2	gap junction protein, beta 2, 26kDa	1.511	Plasma Membrane	transporter
GK2	glycerol kinase 2	-4.255	Cytoplasm	kinase
GKN2	gastrokine 2	-5.524	Extracellular Space	other
GLI1	GLI family zinc finger 1	1.541	Nucleus	transcription regulator
GLRA2	glycine receptor, alpha 2	1.592	Plasma Membrane	ion channel
GLRA3	glycine receptor, alpha 3	1.553	Plasma Membrane	ion channel
Gm765	predicted gene 765	-1.549	Other	other
Gm2990	predicted gene 2990	-1.62	Other	other
Gm4129	predicted gene 4129	-2.542	Other	other
Gm4988	predicted gene 4988	1.541	Other	other
Gm5112	predicted gene 5112	-3.153	Other	other
Gm5431	predicted gene 5431	-2.216	Other	other
Gm5868	predicted gene 5868	-1.522	Other	other
Gm6507	predicted gene 6507	-1.611	Other	other
Gm6556	predicted gene 6556	-1.879	Other	other
Gm6980	predicted gene 6980	1.746	Other	other
Gm8675	predicted gene 8675	-2.114	Other	other
Gm9292	predicted gene 9292	1.523	Other	other
Gm9767	predicted gene 9767	1.579	Other	other
Gm9905	predicted gene 9905	-1.798	Other	other
Gm9966	predicted gene 9966	1.637	Other	other
Gm10069	predicted gene 10069	-1.967	Other	other
Gm10383	predicted gene 10383	1.701	Other	other
Gm10421	predicted gene 10421	-1.685	Other	other
Gm10560	predicted gene 10560	-1.689	Other	other
Gm10605	predicted gene 10605	1.524	Other	other
Gm10635	predicted gene 10635	1.531	Other	other
Gm10848	predicted gene 10848	-2.355	Other	other
Gm11213	predicted gene 11213	-1.506	Other	other
Gm12992	predicted gene 12992	-1.536	Other	other
Gm13770	predicted gene 13770	1.53	Other	other
Gm16489	predicted gene 16489	-1.533	Other	other
Gm16551	predicted gene 16551	2.811	Other	other
Gm15363 (includes others)	predicted gene 6880	-6.28	Cytoplasm	other
Gm3383 (includes others)	predicted gene 3383	1.515	Other	other
GNAO1	guanine nucleotide binding protein (G protein), alpha activating activity polypeptide O	-1.733	Plasma Membrane	enzyme
GNAS	GNAS complex locus	1.566	Plasma Membrane	enzyme
GNG7	guanine nucleotide binding protein (G protein), gamma 7	-1.553	Plasma Membrane	enzyme
GPR88	G protein-coupled receptor 88	-2.125	Plasma Membrane	G-protein coupled receptor
GPR182	G protein-coupled receptor 182	1.528	Plasma Membrane	G-protein coupled receptor
GPX3	glutathione peroxidase 3	1.859	Extracellular Space	enzyme
GPX6	glutathione peroxidase 6	-1.943	Extracellular Space	enzyme
GREB1	growth regulation by estrogen in breast cancer 1	1.699	Cytoplasm	other
GRM5	glutamate receptor, metabotropic 5	-1.532	Plasma Membrane	G-protein coupled receptor
GRP	gastrin-releasing peptide	1.511	Extracellular Space	growth factor
Gstm6	glutathione S-transferase, mu 6	1.508	Cytoplasm	enzyme
Gvin1 (includes others)	GTPase, very large interferon inducible 1	-1.776	Nucleus	other
GYPC	glycophorin C (Gerbich blood group)	1.546	Plasma Membrane	other
H2-Q8	histocompatibility 2, Q region locus 8	-1.64	Plasma Membrane	other
HADHA	hydroxyacyl-CoA dehydrogenase/3-ketoacyl-CoA thiolase/enoyl-CoA hydratase (trifunctional protein), alpha subunit	-2.036	Cytoplasm	enzyme
HAL	histidine ammonia-lyase	1.742	Cytoplasm	enzyme
HAP1	huntingtin-associated protein 1	1.847	Cytoplasm	other
HCST	hematopoietic cell signal transducer	-1.596	Plasma Membrane	transmembrane receptor
HDDC3	HD domain containing 3	1.627	Other	other
HEMK1	HemK methyltransferase family member 1	1.533	Nucleus	enzyme
HERC2	HECT and RLD domain containing E3 ubiquitin protein ligase 2	-1.736	Cytoplasm	enzyme
HFM1	HFM1, ATP-dependent DNA helicase homolog (S. cerevisiae)	1.504	Other	other
HLA-DOA	major histocompatibility complex, class II, DO alpha	-1.57	Plasma Membrane	transmembrane receptor
HMGA1	high mobility group AT-hook 1	-1.616	Nucleus	transcription regulator
HMGCS2	3-hydroxy-3-methylglutaryl-CoA synthase 2 (mitochondrial)	2.2	Cytoplasm	enzyme
HMP19	HMP19 protein	-1.639	Cytoplasm	other
HOMER1	homer scaffolding protein 1	-1.756	Plasma Membrane	other
HS6ST3	heparan sulfate 6-O-sulfotransferase 3	-1.578	Other	enzyme
HSPA1A/HSPA1B	heat shock 70kDa protein 1A	1.523	Cytoplasm	enzyme
HTR2C	5-hydroxytryptamine (serotonin) receptor 2C, G protein-coupled	2.538	Plasma Membrane	G-protein coupled receptor
Htr5b	5-hydroxytryptamine (serotonin) receptor 5B	1.749	Plasma Membrane	G-protein coupled receptor
IGF1	insulin-like growth factor 1 (somatomedin C)	-1.646	Extracellular Space	growth factor
IGSF1	immunoglobulin superfamily, member 1	1.619	Plasma Membrane	other
Il31	interleukin 31	-1.76	Other	other
IL22RA1	interleukin 22 receptor, alpha 1	-8.637	Plasma Membrane	transmembrane receptor
ILDR2	immunoglobulin-like domain containing receptor 2	-1.494	Other	other
INPP4B	inositol polyphosphate-4-phosphatase, type II, 105kDa	1.695	Cytoplasm	phosphatase
INPP5B	inositol polyphosphate-5-phosphatase, 75kDa	-3.38	Plasma Membrane	phosphatase
INSR	insulin receptor	-3.312	Plasma Membrane	kinase
ITGAV	integrin, alpha V	-1.564	Plasma Membrane	ion channel
ITGB2	integrin, beta 2 (complement component 3 receptor 3 and 4 subunit)	-1.535	Plasma Membrane	transmembrane receptor
ITIH2	inter-alpha-trypsin inhibitor heavy chain 2	1.775	Extracellular Space	other
ITPR2	inositol 1,4,5-trisphosphate receptor, type 2	-1.533	Cytoplasm	ion channel
IVNS1ABP	influenza virus NS1A binding protein	-1.6	Nucleus	other
KALRN	kalirin, RhoGEF kinase	-1.554	Cytoplasm	kinase
KCNA7	potassium channel, voltage gated shaker related subfamily A, member 7	-2.507	Plasma Membrane	ion channel
Kcnd3os	potassium voltage-gated channel, Shal-related family, member 3, opposite strand	1.588	Other	other
KCNG1	potassium channel, voltage gated modifier subfamily G, member 1	1.802	Plasma Membrane	ion channel
KCNH5	potassium channel, voltage gated eag related subfamily H, member 5	-1.626	Plasma Membrane	ion channel
KCNH7	potassium channel, voltage gated eag related subfamily H, member 7	-1.918	Plasma Membrane	ion channel
KCTD16	potassium channel tetramerization domain containing 16	-1.496	Plasma Membrane	other
KCTD18	potassium channel tetramerization domain containing 18	-5.916	Other	other
KIF26A	kinesin family member 26A	1.588	Cytoplasm	other
KISS1	KiSS-1 metastasis-suppressor	1.967	Cytoplasm	other
KLHDC8B	kelch domain containing 8B	-2.015	Cytoplasm	other
KLK3	kallikrein-related peptidase 3	-1.759	Extracellular Space	peptidase
Klra4 (includes others)	killer cell lectin-like receptor, subfamily A, member 4	-2.432	Plasma Membrane	transmembrane receptor
KRT14	keratin 14, type I	-1.88	Cytoplasm	other
Krt85	keratin 85	-1.513	Other	other
KRTAP1-1	keratin associated protein 1-1	-2.562	Other	other
KXD1	KxDL motif containing 1	-1.527	Other	other
LAX1	lymphocyte transmembrane adaptor 1	-5.109	Cytoplasm	other
LEP	leptin	1.7	Extracellular Space	growth factor
LEPR	leptin receptor	-1.558	Plasma Membrane	transmembrane receptor
LGALS12	lectin, galactoside-binding, soluble, 12	-2.17	Extracellular Space	other
LHX9	LIM homeobox 9	1.763	Nucleus	transcription regulator
Lmo3	LIM domain only 3	1.687	Cytoplasm	other
LOC101929469	uncharacterized protein ENSP00000372125	-1.53	Other	other
LRP6	low density lipoprotein receptor-related protein 6	-1.562	Plasma Membrane	transmembrane receptor
LRRC10B	leucine rich repeat containing 10B	-2.098	Other	other
LRRK2	leucine-rich repeat kinase 2	1.555	Cytoplasm	kinase
LTF	lactotransferrin	-1.952	Extracellular Space	peptidase
LY75	lymphocyte antigen 75	-1.909	Plasma Membrane	transmembrane receptor
Ly6g6e	lymphocyte antigen 6 complex, locus G6E	2.124	Other	other
LYPD1	LY6/PLAUR domain containing 1	1.675	Plasma Membrane	G-protein coupled receptor
LZTS1	leucine zipper, putative tumor suppressor 1	-1.672	Nucleus	transcription regulator
MADD	MAP-kinase activating death domain	-2.011	Cytoplasm	other
MAGEL2	melanoma antigen family L2	2.733	Cytoplasm	enzyme
MARCKSL1	MARCKS-like 1	1.794	Cytoplasm	other
MAS1	MAS1 proto-oncogene, G protein-coupled receptor	1.834	Plasma Membrane	G-protein coupled receptor
MATN2	matrilin 2	1.56	Extracellular Space	other
MBP	myelin basic protein	-1.54	Extracellular Space	other
MEGF6	multiple EGF-like-domains 6	1.574	Cytoplasm	other
MEGF11	multiple EGF-like-domains 11	1.596	Other	other
MEOX1	mesenchyme homeobox 1	1.54	Nucleus	transcription regulator
MMP9	matrix metallopeptidase 9	-4.487	Extracellular Space	peptidase
MNS1	meiosis-specific nuclear structural 1	1.557	Cytoplasm	other
MPO	myeloperoxidase	-1.635	Cytoplasm	enzyme
MRAP2	melanocortin 2 receptor accessory protein 2	1.681	Cytoplasm	other
MRGPRG	MAS-related GPR, member G	-2.181	Plasma Membrane	G-protein coupled receptor
MS4A15	membrane-spanning 4-domains, subfamily A, member 15	2.842	Other	other
Ms4a4b (includes others)	membrane-spanning 4-domains, subfamily A, member 4B	-1.855	Plasma Membrane	other
MST1R	macrophage stimulating 1 receptor	1.542	Plasma Membrane	kinase
MUSK	muscle, skeletal, receptor tyrosine kinase	-1.529	Plasma Membrane	kinase
MYL1	myosin, light chain 1, alkali; skeletal, fast	-1.603	Cytoplasm	other
MYL7	myosin, light chain 7, regulatory	-2.117	Cytoplasm	enzyme
MYO18A	myosin XVIIIA	-1.695	Cytoplasm	other
MYT1L	myelin transcription factor 1-like	-1.688	Nucleus	transcription regulator
NAV2	neuron navigator 2	-1.572	Nucleus	other
NCBP2-AS2	NCBP2 antisense RNA 2 (head to head)	1.554	Other	other
NCS1	neuronal calcium sensor 1	1.507	Cytoplasm	other
NDN	necdin, melanoma antigen (MAGE) family member	1.94	Nucleus	other
NDST3	N-deacetylase/N-sulfotransferase (heparan glucosaminyl) 3	1.633	Cytoplasm	enzyme
NDST4	N-deacetylase/N-sulfotransferase (heparan glucosaminyl) 4	2.458	Cytoplasm	enzyme
NEXN	nexilin (F actin binding protein)	-1.554	Plasma Membrane	other
NGB	neuroglobin	1.86	Cytoplasm	transporter
Ngp	neutrophilic granule protein	-1.775	Extracellular Space	other
NKAIN3	Na+/K+ transporting ATPase interacting 3	2.045	Other	other
NKD2	naked cuticle homolog 2 (Drosophila)	-1.513	Nucleus	other
NNAT	neuronatin	1.85	Plasma Membrane	transporter
NOTO	notochord homeobox	-1.706	Other	other
NPAS3	neuronal PAS domain protein 3	-2.309	Nucleus	other
NPY2R	neuropeptide Y receptor Y2	2.178	Plasma Membrane	G-protein coupled receptor
NR1I3	nuclear receptor subfamily 1, group I, member 3	-2.018	Nucleus	ligand-dependent nuclear receptor
NR2F2	nuclear receptor subfamily 2, group F, member 2	2.322	Nucleus	ligand-dependent nuclear receptor
NR4A1	nuclear receptor subfamily 4, group A, member 1	-1.538	Nucleus	ligand-dependent nuclear receptor
NR4A2	nuclear receptor subfamily 4, group A, member 2	-1.563	Nucleus	ligand-dependent nuclear receptor
NRIP2	nuclear receptor interacting protein 2	1.513	Nucleus	transcription regulator
NRP2	neuropilin 2	1.848	Plasma Membrane	kinase
NTF3	neurotrophin 3	1.601	Extracellular Space	growth factor
Olfr458	olfactory receptor 458	-15.922	Plasma Membrane	G-protein coupled receptor
Olfr544	olfactory receptor 544	-1.581	Plasma Membrane	G-protein coupled receptor
Olfr653	olfactory receptor 653	-4.73	Plasma Membrane	G-protein coupled receptor
Olfr1043	olfactory receptor 1043	-1.85	Plasma Membrane	G-protein coupled receptor
Olfr1133	olfactory receptor 1133	-2.718	Plasma Membrane	G-protein coupled receptor
Olfr1459	olfactory receptor 1459	-3.417	Plasma Membrane	G-protein coupled receptor
Olfr1466	olfactory receptor 1466	1.532	Plasma Membrane	G-protein coupled receptor
OR2C1	olfactory receptor, family 2, subfamily C, member 1	-1.561	Plasma Membrane	G-protein coupled receptor
OR9I1	olfactory receptor, family 9, subfamily I, member 1	-1.716	Plasma Membrane	G-protein coupled receptor
OR9Q1	olfactory receptor, family 9, subfamily Q, member 1	-1.903	Plasma Membrane	G-protein coupled receptor
OVCH2	ovochymase 2 (gene/pseudogene)	-1.77	Other	other
OVOL2	ovo-like zinc finger 2	-2.047	Nucleus	transcription regulator
PALM3	paralemmin 3	1.586	Other	other
PAPPA2	pappalysin 2	2.915	Extracellular Space	peptidase
PARD3	par-3 family cell polarity regulator	-1.626	Plasma Membrane	other
PAX1	paired box 1	-1.603	Nucleus	transcription regulator
PBX1	pre-B-cell leukemia homeobox 1	-1.594	Nucleus	transcription regulator
PCDH19	protocadherin 19	1.512	Extracellular Space	other
PCDHGA9	protocadherin gamma subfamily A, 9	-1.498	Other	other
PCSK5	proprotein convertase subtilisin/kexin type 5	1.592	Extracellular Space	peptidase
PDE10A	phosphodiesterase 10A	-2.11	Cytoplasm	enzyme
PDE4B	phosphodiesterase 4B, cAMP-specific	-1.529	Cytoplasm	enzyme
PDE5A	phosphodiesterase 5A, cGMP-specific	-1.722	Cytoplasm	enzyme
PDE8B	phosphodiesterase 8B	-1.657	Cytoplasm	enzyme
PDIK1L	PDLIM1 interacting kinase 1 like	-1.587	Nucleus	kinase
PDLIM2	PDZ and LIM domain 2 (mystique)	-1.523	Cytoplasm	other
PDLIM5	PDZ and LIM domain 5	1.573	Cytoplasm	other
PDZRN4	PDZ domain containing ring finger 4	1.582	Other	other
PER1	period circadian clock 1	-1.673	Nucleus	other
PGM5	phosphoglucomutase 5	1.599	Cytoplasm	enzyme
PI16	peptidase inhibitor 16	1.556	Extracellular Space	other
PIGN	phosphatidylinositol glycan anchor biosynthesis, class N	-1.529	Cytoplasm	enzyme
PKP2	plakophilin 2	1.539	Plasma Membrane	other
PLA2G3	phospholipase A2, group III	1.514	Extracellular Space	enzyme
PMFBP1	polyamine modulated factor 1 binding protein 1	1.566	Cytoplasm	other
PNP	purine nucleoside phosphorylase	1.737	Nucleus	enzyme
POLG2	polymerase (DNA directed), gamma 2, accessory subunit	-5.727	Cytoplasm	enzyme
PPARA	peroxisome proliferator-activated receptor alpha	-2.173	Nucleus	ligand-dependent nuclear receptor
PPIH	peptidylprolyl isomerase H (cyclophilin H)	1.772	Nucleus	enzyme
PPP1R1B	protein phosphatase 1, regulatory (inhibitor) subunit 1B	-1.644	Cytoplasm	phosphatase
PPTC7	PTC7 protein phosphatase homolog (S. cerevisiae)	-1.504	Cytoplasm	phosphatase
PRDM15	PR domain containing 15	1.521	Nucleus	other
Prg4	proteoglycan 4 (megakaryocyte stimulating factor, articular superficial zone protein)	1.815	Extracellular Space	other
PRM3	protamine 3	-1.493	Nucleus	other
PRR5L	proline rich 5 like	-2.255	Cytoplasm	other
PRSS37	protease, serine, 37	-1.516	Extracellular Space	peptidase
Prss1 (includes others)	protease, serine 1 (trypsin 1)	1.635	Extracellular Space	peptidase
PTPN7	protein tyrosine phosphatase, non-receptor type 7	-1.554	Cytoplasm	phosphatase
PTPRO	protein tyrosine phosphatase, receptor type, O	1.603	Plasma Membrane	phosphatase
Ptprv	protein tyrosine phosphatase, receptor type, V	-1.494	Other	other
QRFPR	pyroglutamylated RFamide peptide receptor	1.536	Plasma Membrane	G-protein coupled receptor
QSER1	glutamine and serine rich 1	-1.934	Other	other
RABGAP1	RAB GTPase activating protein 1	-2.004	Cytoplasm	other
RANBP3L	RAN binding protein 3-like	1.573	Other	other
RAPH1	Ras association (RalGDS/AF-6) and pleckstrin homology domains 1	1.683	Plasma Membrane	other
RARB	retinoic acid receptor, beta	-1.552	Nucleus	ligand-dependent nuclear receptor
RASD1	RAS, dexamethasone-induced 1	1.771	Cytoplasm	enzyme
RASD2	RASD family, member 2	-1.538	Cytoplasm	enzyme
REM2	RAS (RAD and GEM)-like GTP binding 2	-1.75	Plasma Membrane	enzyme
RFX6	regulatory factor X, 6	-2.338	Nucleus	enzyme
RGS9	regulator of G-protein signaling 9	-2.26	Cytoplasm	enzyme
RHCG	Rh family, C glycoprotein	1.911	Plasma Membrane	transporter
Rhox2a (includes others)	reproductive homeobox 2A	-2.179	Nucleus	transcription regulator
RIPK4	receptor-interacting serine-threonine kinase 4	1.512	Nucleus	kinase
RMRP	RNA component of mitochondrial RNA processing endoribonuclease	-1.559	Cytoplasm	other
RNASEL	ribonuclease L (2',5'-oligoisoadenylate synthetase-dependent)	1.711	Cytoplasm	enzyme
RNASET2	ribonuclease T2	-2.303	Cytoplasm	enzyme
RNF182	ring finger protein 182	1.527	Cytoplasm	enzyme
RNU12	RNA, U12 small nuclear	-1.499	Nucleus	other
Rnu1b6	U1b6 small nuclear RNA	-1.504	Other	other
Rnu3b1	U3B small nuclear RNA 1	-1.544	Other	other
RORB	RAR-related orphan receptor B	-1.56	Nucleus	ligand-dependent nuclear receptor
RORC	RAR-related orphan receptor C	1.532	Nucleus	ligand-dependent nuclear receptor
RS1	retinoschisin 1	-1.6	Extracellular Space	other
RSPO2	R-spondin 2	1.894	Extracellular Space	other
RXRG	retinoid X receptor, gamma	-1.627	Nucleus	ligand-dependent nuclear receptor
S100A8	S100 calcium binding protein A8	-2.801	Cytoplasm	other
S100A9	S100 calcium binding protein A9	-3.017	Cytoplasm	other
SCAF8	SR-related CTD-associated factor 8	-1.552	Nucleus	other
Scd3	stearoyl-coenzyme A desaturase 3	-1.509	Cytoplasm	enzyme
SCML4	sex comb on midleg-like 4 (Drosophila)	1.739	Other	other
SCN3A	sodium channel, voltage gated, type III alpha subunit	-1.559	Plasma Membrane	ion channel
SCN4B	sodium channel, voltage gated, type IV beta subunit	-2.037	Plasma Membrane	ion channel
SCN5A	sodium channel, voltage gated, type V alpha subunit	-1.571	Plasma Membrane	ion channel
SCN9A	sodium channel, voltage gated, type IX alpha subunit	-3.717	Plasma Membrane	ion channel
SCUBE3	signal peptide, CUB domain, EGF-like 3	-1.67	Plasma Membrane	other
SDAD1	SDA1 domain containing 1	-1.519	Nucleus	other
SDCBP2	syndecan binding protein (syntenin) 2	1.636	Cytoplasm	other
SEC14L4	SEC14-like 4 (S. cerevisiae)	1.652	Other	transporter
SEC24D	SEC24 family member D	1.553	Cytoplasm	transporter
SERPINA9	serpin peptidase inhibitor, clade A (alpha-1 antiproteinase, antitrypsin), member 9	-2.38	Extracellular Space	other
SFMBT2	Scm-like with four mbt domains 2	1.717	Nucleus	other
SFRP5	secreted frizzled-related protein 5	-1.504	Plasma Membrane	transmembrane receptor
SH3RF2	SH3 domain containing ring finger 2	-1.78	Extracellular Space	other
SHC4	SHC (Src homology 2 domain containing) family, member 4	-1.692	Cytoplasm	other
SIX2	SIX homeobox 2	1.697	Nucleus	transcription regulator
SIX3	SIX homeobox 3	-1.517	Nucleus	transcription regulator
SLC17A5	solute carrier family 17 (acidic sugar transporter), member 5	-1.535	Plasma Membrane	transporter
SLC22A2	solute carrier family 22 (organic cation transporter), member 2	2.618	Plasma Membrane	transporter
SLC25A22	solute carrier family 25 (mitochondrial carrier: glutamate), member 22	1.645	Cytoplasm	transporter
SLC25A37	solute carrier family 25 (mitochondrial iron transporter), member 37	-1.536	Cytoplasm	other
SLC26A4	solute carrier family 26 (anion exchanger), member 4	1.742	Plasma Membrane	transporter
SLC38A8	solute carrier family 38, member 8	-5.696	Other	other
SLC6A3	solute carrier family 6 (neurotransmitter transporter), member 3	1.611	Plasma Membrane	transporter
SLC6A12	solute carrier family 6 (neurotransmitter transporter), member 12	1.834	Plasma Membrane	transporter
SLC6A13	solute carrier family 6 (neurotransmitter transporter), member 13	1.744	Plasma Membrane	transporter
SLC7A3	solute carrier family 7 (cationic amino acid transporter, y+ system), member 3	1.866	Plasma Membrane	transporter
SLC8A3	solute carrier family 8 (sodium/calcium exchanger), member 3	-1.517	Plasma Membrane	transporter
SLIT1	slit homolog 1 (Drosophila)	1.666	Extracellular Space	other
SMG5	SMG5 nonsense mediated mRNA decay factor	-1.588	Nucleus	other
Smok2b (includes others)	sperm motility kinase 2B	-1.981	Other	kinase
SMTNL2	smoothelin-like 2	1.505	Other	other
SNAI1	snail family zinc finger 1	1.507	Nucleus	transcription regulator
SNRNP27	small nuclear ribonucleoprotein 27kDa (U4/U6.U5)	-1.495	Nucleus	other
SP8	Sp8 transcription factor	1.662	Nucleus	other
Speer6-ps1	spermatogenesis associated glutamate (E)-rich protein 6, pseudogene 1	-5.369	Other	other
SPESP1	sperm equatorial segment protein 1	-1.802	Cytoplasm	other
SPHK1	sphingosine kinase 1	1.585	Cytoplasm	kinase
SPINK8	serine peptidase inhibitor, Kazal type 8 (putative)	3.935	Other	other
SPINT1	serine peptidase inhibitor, Kunitz type 1	2.444	Extracellular Space	other
SPON1	spondin 1, extracellular matrix protein	1.649	Extracellular Space	other
SRCAP	Snf2-related CREBBP activator protein	-1.553	Cytoplasm	transcription regulator
SRGAP3	SLIT-ROBO Rho GTPase activating protein 3	-1.538	Cytoplasm	other
ST6GALNAC1	ST6 (alpha-N-acetyl-neuraminyl-2,3-beta-galactosyl-1,3)-N-acetylgalactosaminide alpha-2,6-sialyltransferase 1	-1.733	Cytoplasm	enzyme
ST6GALNAC5	ST6 (alpha-N-acetyl-neuraminyl-2,3-beta-galactosyl-1,3)-N-acetylgalactosaminide alpha-2,6-sialyltransferase 5	1.695	Cytoplasm	enzyme
STAC	SH3 and cysteine rich domain	2.03	Cytoplasm	other
Sult1a1	sulfotransferase family 1A, phenol-preferring, member 1	1.576	Cytoplasm	enzyme
Sult5a1	sulfotransferase family 5A, member 1	1.615	Other	other
SUSD2	sushi domain containing 2	1.539	Extracellular Space	other
SV2C	synaptic vesicle glycoprotein 2C	-1.977	Plasma Membrane	other
SYBU	syntabulin (syntaxin-interacting)	-1.585	Other	other
SYCP1	synaptonemal complex protein 1	-2.987	Nucleus	other
SYN3	synapsin III	-2.558	Plasma Membrane	other
SYT2	synaptotagmin II	-1.59	Cytoplasm	transporter
SYT10	synaptotagmin X	-1.493	Cytoplasm	transporter
SYTL4	synaptotagmin-like 4	1.782	Cytoplasm	transporter
TAP1	transporter 1, ATP-binding cassette, sub-family B (MDR/TAP)	-1.826	Cytoplasm	transporter
TBCA	tubulin folding cofactor A	-2.103	Cytoplasm	other
TBX2	T-box 2	1.522	Nucleus	transcription regulator
TBX21	T-box 21	1.792	Nucleus	transcription regulator
TBX22	T-box 22	-2.102	Nucleus	transcription regulator
TCAP	titin-cap	-1.815	Cytoplasm	other
TCP11	t-complex 11, testis-specific	1.503	Other	other
TDGF1	teratocarcinoma-derived growth factor 1	-2.204	Plasma Membrane	other
TEKT1	tektin 1	1.547	Cytoplasm	other
TGFBR2	transforming growth factor, beta receptor II (70/80kDa)	-1.69	Plasma Membrane	kinase
TH	tyrosine hydroxylase	1.968	Cytoplasm	enzyme
THBD	thrombomodulin	1.829	Plasma Membrane	transmembrane receptor
THSD7A	thrombospondin, type I, domain containing 7A	-1.556	Cytoplasm	other
TMCO5A	transmembrane and coiled-coil domains 5A	1.683	Other	other
TMEM132D	transmembrane protein 132D	-1.514	Other	other
TMEM184A	transmembrane protein 184A	-1.545	Cytoplasm	other
TMPRSS7	transmembrane protease, serine 7	-1.593	Plasma Membrane	peptidase
TNFSF10	tumor necrosis factor (ligand) superfamily, member 10	-1.743	Extracellular Space	cytokine
TNNT2	troponin T type 2 (cardiac)	1.832	Cytoplasm	other
TP73	tumor protein p73	-2.276	Nucleus	transcription regulator
TPBG	trophoblast glycoprotein	-1.787	Plasma Membrane	other
TRHR	thyrotropin-releasing hormone receptor	2.145	Plasma Membrane	G-protein coupled receptor
TRIB1	tribbles pseudokinase 1	-1.613	Cytoplasm	kinase
TRMT112	tRNA methyltransferase 11-2 homolog (S. cerevisiae)	-1.784	Cytoplasm	enzyme
TRPC4	transient receptor potential cation channel, subfamily C, member 4	1.74	Plasma Membrane	ion channel
TSHZ2	teashirt zinc finger homeobox 2	2.017	Other	other
TSPAN1	tetraspanin 1	1.541	Cytoplasm	transporter
TTC25	tetratricopeptide repeat domain 25	-2.234	Cytoplasm	other
TUB	tubby bipartite transcription factor	-1.926	Cytoplasm	transcription regulator
TUFT1	tuftelin 1	1.527	Cytoplasm	other
TWIST1	twist family bHLH transcription factor 1	-2.554	Nucleus	transcription regulator
TWIST2	twist family bHLH transcription factor 2	1.791	Nucleus	transcription regulator
UCHL3	ubiquitin carboxyl-terminal esterase L3 (ubiquitin thiolesterase)	-3.9	Cytoplasm	peptidase
UCMA	upper zone of growth plate and cartilage matrix associated	1.772	Extracellular Space	other
UCN3	urocortin 3	1.573	Extracellular Space	other
UPB1	ureidopropionase, beta	-1.742	Cytoplasm	enzyme
USP18	ubiquitin specific peptidase 18	-2.221	Cytoplasm	peptidase
USP51	ubiquitin specific peptidase 51	1.892	Other	peptidase
VAMP5	vesicle-associated membrane protein 5	-1.702	Plasma Membrane	transporter
VAT1L	vesicle amine transport 1-like	1.583	Other	enzyme
VEGFC	vascular endothelial growth factor C	1.551	Extracellular Space	growth factor
Vmn1r75	vomeronasal 1 receptor 75	-1.675	Plasma Membrane	G-protein coupled receptor
Vmn1r214 (includes others)	vomeronasal 1 receptor 214	-1.56	Plasma Membrane	G-protein coupled receptor
Vmn1r49 (includes others)	vomeronasal 1, receptor 49	2.692	Plasma Membrane	G-protein coupled receptor
Vmn2r108 (includes others)	vomeronasal 2, receptor 110	-7.503	Other	other
Vmn2r88 (includes others)	vomeronasal 2, receptor 88	-1.613	Other	other
WDR78	WD repeat domain 78	1.59	Other	other
WFIKKN2	WAP, follistatin/kazal, immunoglobulin, kunitz and netrin domain containing 2	1.72	Extracellular Space	other
WNT6	wingless-type MMTV integration site family, member 6	1.91	Extracellular Space	other
XIRP2	xin actin-binding repeat containing 2	7.188	Other	other
ZCCHC12	zinc finger, CCHC domain containing 12	2.011	Nucleus	transcription regulator
ZCCHC16	zinc finger, CCHC domain containing 16	1.52	Other	other
ZFHX2	zinc finger homeobox 2	-1.533	Nucleus	other
ZFP92	ZFP92 zinc finger protein	1.815	Nucleus	other
Zfp345 (includes others)	zinc finger protein 345	-2.165	Other	other
ZIC1	Zic family member 1	2.287	Nucleus	transcription regulator
ZIC3	Zic family member 3	1.738	Nucleus	transcription regulator
ZIC4	Zic family member 4	1.687	Nucleus	other
ZMYND12	zinc finger, MYND-type containing 12	1.55	Other	other
ZNF169	zinc finger protein 169	-1.926	Nucleus	transcription regulator
ZNF423	zinc finger protein 423	1.704	Nucleus	transcription regulator
ZNF503	zinc finger protein 503	-1.624	Nucleus	other
ZNF616	zinc finger protein 616	-1.529	Nucleus	other
ZNF790	zinc finger protein 790	-2.269	Other	other

## Sheet: Table S7
SPECIFIC DEGs FOR HIPPOCAMPUS IN TGVD+ AT M9
Gene Symbol	Entrez Gene Name	FC Hippocampus	Location	Type(s)
1110035H17Rik	RIKEN cDNA 1110035H17 gene	-1.75	Other	other
1700025F22Rik	RIKEN cDNA 1700025F22 gene	2.009	Other	other
1700057H15Rik	RIKEN cDNA 1700057H15 gene	1.767	Other	other
1700061I17Rik	RIKEN cDNA 1700061I17 gene	-1.727	Other	other
1810008I18Rik	RIKEN cDNA 1810008I18 gene	-2.156	Other	other
1810010D01Rik	RIKEN cDNA 1810010D01 gene	1.554	Other	other
2900060N18Rik	RIKEN cDNA 2900060N18 gene	-4.304	Other	other
4833423E24Rik	RIKEN cDNA 4833423E24 gene	-1.555	Other	other
4921539H07Rik	RIKEN cDNA 4921539H07 gene	1.54	Other	other
4930517G19Rik	RIKEN cDNA 4930517G19 gene	-1.621	Other	other
4930519D14Rik	RIKEN cDNA 4930519D14 gene	-12.136	Other	other
4930544M13Rik	RIKEN cDNA 4930544M13 gene	-2.742	Other	other
4931403G20Rik	RIKEN cDNA 4931403G20 gene	-1.753	Other	other
4931430N09Rik	RIKEN cDNA 4931430N09 gene	2.706	Other	other
5033430I15Rik	RIKEN cDNA 5033430I15 gene	1.541	Other	other
9430065F17Rik	RIKEN cDNA 9430065F17 gene	1.504	Other	other
A230001M10Rik	RIKEN cDNA A230001M10 gene	1.518	Other	other
A230072E10Rik	RIKEN cDNA A230072E10 gene	-1.527	Other	other
A430105J06Rik	RIKEN cDNA A430105J06 gene	1.601	Other	other
A530083I20Rik	RIKEN cDNA A530083I20 gene	1.632	Other	other
A630010A05Rik	RIKEN cDNA A630010A05 gene	-8.927	Other	other
A630073K07Rik	RIKEN cDNA A630073K07 gene	1.523	Other	other
AA388235	expressed sequence AA388235	-1.538	Other	other
ABCA4	ATP-binding cassette, sub-family A (ABC1), member 4	-1.658	Plasma Membrane	transporter
ABCB8	ATP-binding cassette, sub-family B (MDR/TAP), member 8	4.219	Cytoplasm	transporter
Abhd1	abhydrolase domain containing 1	-1.552	Other	other
ABHD12B	abhydrolase domain containing 12B	2.595	Other	peptidase
ACBD7	acyl-CoA binding domain containing 7	1.518	Other	other
ACE	angiotensin I converting enzyme	-2.527	Plasma Membrane	peptidase
ADAMTS19	ADAM metallopeptidase with thrombospondin type 1 motif, 19	1.613	Extracellular Space	peptidase
AGTRAP	angiotensin II receptor-associated protein	-1.658	Plasma Membrane	G-protein coupled receptor
AHNAK	AHNAK nucleoprotein	3.418	Nucleus	other
AMICA1	adhesion molecule, interacts with CXADR antigen 1	1.608	Plasma Membrane	other
ANGPTL7	angiopoietin-like 7	-1.564	Extracellular Space	other
Ankrd50	ankyrin repeat domain 50	1.634	Other	other
ANKRD34C	ankyrin repeat domain 34C	1.531	Other	other
APOL2	apolipoprotein L, 2	1.795	Cytoplasm	other
APOLD1	apolipoprotein L domain containing 1	1.64	Other	other
AQP6	aquaporin 6, kidney specific	1.59	Cytoplasm	transporter
B020031H02Rik	RIKEN cDNA B020031H02 gene	1.559	Other	other
BAIAP2L2	BAI1-associated protein 2-like 2	1.798	Cytoplasm	other
BB557941	expressed sequence BB557941	1.771	Other	other
BC039966	cDNA sequence BC039966	1.749	Other	other
BCAM	basal cell adhesion molecule (Lutheran blood group)	-1.666	Plasma Membrane	transmembrane receptor
BCL2L15	BCL2-like 15	-1.513	Nucleus	other
BMP6	bone morphogenetic protein 6	-1.63	Extracellular Space	growth factor
C14orf39	chromosome 14 open reading frame 39	1.685	Extracellular Space	other
C1QTNF5	C1q and tumor necrosis factor related protein 5	-1.779	Plasma Membrane	transmembrane receptor
C1R	complement component 1, r subcomponent	-1.645	Extracellular Space	peptidase
C2orf40	chromosome 2 open reading frame 40	-2.704	Extracellular Space	other
C2orf70	chromosome 2 open reading frame 70	-1.747	Nucleus	other
C9orf9	chromosome 9 open reading frame 9	-1.654	Cytoplasm	other
CBLN2	cerebellin 2 precursor	1.566	Extracellular Space	other
CCDC114	coiled-coil domain containing 114	-1.771	Extracellular Space	other
Ccl7	chemokine (C-C motif) ligand 7	-1.946	Extracellular Space	cytokine
Ccl8	chemokine (C-C motif) ligand 8	-1.929	Extracellular Space	other
CCL21	chemokine (C-C motif) ligand 21	1.92	Extracellular Space	cytokine
CCRN4L	CCR4 carbon catabolite repression 4-like (S. cerevisiae)	1.592	Nucleus	transcription regulator
CD84	CD84 molecule	-1.529	Plasma Membrane	other
Cdkn1c	cyclin-dependent kinase inhibitor 1C (P57)	-1.784	Nucleus	other
CEACAM1	carcinoembryonic antigen-related cell adhesion molecule 1 (biliary glycoprotein)	-2.095	Plasma Membrane	other
CER1	cerberus 1, DAN family BMP antagonist	1.592	Extracellular Space	cytokine
Cfap61	cilia and flagella associated protein 61	-1.987	Other	other
CFL1	cofilin 1 (non-muscle)	-1.761	Nucleus	other
CHDH	choline dehydrogenase	-1.562	Cytoplasm	enzyme
Chil6	chitinase-like 6	1.553	Other	other
CHRD	chordin	-4.291	Extracellular Space	other
CHRNA4	cholinergic receptor, nicotinic, alpha 4 (neuronal)	1.628	Plasma Membrane	transmembrane receptor
CITED1	Cbp/p300-interacting transactivator, with Glu/Asp-rich carboxy-terminal domain, 1	1.518	Nucleus	transcription regulator
CLDN2	claudin 2	-2.305	Plasma Membrane	other
CLDN3	claudin 3	-1.806	Plasma Membrane	transmembrane receptor
CLEC18B	C-type lectin domain family 18, member B	1.601	Other	other
CLIC6	chloride intracellular channel 6	-2.345	Plasma Membrane	ion channel
CMTM4	CKLF-like MARVEL transmembrane domain containing 4	1.596	Extracellular Space	cytokine
Cmtm2a	CKLF-like MARVEL transmembrane domain containing 2A	-1.546	Cytoplasm	transcription regulator
CNPY4	canopy FGF signaling regulator 4	1.732	Other	other
CNTN4	contactin 4	1.761	Plasma Membrane	enzyme
COL25A1	collagen, type XXV, alpha 1	-1.793	Cytoplasm	other
COL6A3	collagen, type VI, alpha 3	-1.712	Extracellular Space	other
COL8A1	collagen, type VIII, alpha 1	-1.506	Extracellular Space	other
COL8A2	collagen, type VIII, alpha 2	-2.62	Extracellular Space	other
COL9A1	collagen, type IX, alpha 1	1.988	Extracellular Space	other
COX10	COX10 heme A:farnesyltransferase cytochrome c oxidase assembly factor	-16.422	Cytoplasm	enzyme
COX6B2	cytochrome c oxidase subunit VIb polypeptide 2 (testis)	-1.588	Cytoplasm	enzyme
Cox7c	cytochrome c oxidase subunit VIIc	1.544	Cytoplasm	other
Cox8b	cytochrome c oxidase subunit VIIIb	-1.933	Cytoplasm	enzyme
CPLX2	complexin 2	1.641	Cytoplasm	other
CPT1A	carnitine palmitoyltransferase 1A (liver)	1.603	Cytoplasm	enzyme
CPXM2	carboxypeptidase X (M14 family), member 2	-1.594	Extracellular Space	peptidase
CRH	corticotropin releasing hormone	1.738	Extracellular Space	cytokine
CRHR2	corticotropin releasing hormone receptor 2	-1.5	Plasma Membrane	G-protein coupled receptor
CRTAM	cytotoxic and regulatory T cell molecule	1.533	Plasma Membrane	other
CRYAA/LOC102724652	crystallin, alpha A	1.558	Cytoplasm	other
CSF1R	colony stimulating factor 1 receptor	-1.605	Plasma Membrane	kinase
CSTA	cystatin A (stefin A)	-2.14	Cytoplasm	other
CTSD	cathepsin D	-1.512	Cytoplasm	peptidase
CTSZ	cathepsin Z	-1.571	Cytoplasm	peptidase
CUTC	cutC copper transporter	-2.705	Cytoplasm	other
Cxcl9	chemokine (C-X-C motif) ligand 9	-1.895	Extracellular Space	cytokine
CXCL13	chemokine (C-X-C motif) ligand 13	-1.789	Extracellular Space	cytokine
CYP2A6 (includes others)	cytochrome P450, family 2, subfamily A, polypeptide 6	3.604	Cytoplasm	enzyme
Cyp2g1	cytochrome P450, family 2, subfamily g, polypeptide 1	2.709	Cytoplasm	enzyme
CYP3A5	cytochrome P450, family 3, subfamily A, polypeptide 5	-1.514	Cytoplasm	enzyme
CYP4F2	cytochrome P450, family 4, subfamily F, polypeptide 2	-1.612	Cytoplasm	enzyme
D430040D24Rik	RIKEN cDNA D430040D24 gene	1.555	Other	other
D730003K21Rik	RIKEN cDNA D730003K21 gene	-1.652	Other	other
DACH1	dachshund family transcription factor 1	1.71	Nucleus	transcription regulator
DAO	D-amino-acid oxidase	1.71	Cytoplasm	enzyme
DAPK2	death-associated protein kinase 2	1.61	Cytoplasm	kinase
DDR2	discoidin domain receptor tyrosine kinase 2	-1.571	Plasma Membrane	kinase
DNAI2	dynein, axonemal, intermediate chain 2	-1.581	Cytoplasm	other
DSG2	desmoglein 2	-2.253	Plasma Membrane	other
DSP	desmoplakin	-1.947	Plasma Membrane	other
DUSP8	dual specificity phosphatase 8	2.316	Nucleus	phosphatase
DYDC2	DPY30 domain containing 2	-2.267	Extracellular Space	other
ENPP2	ectonucleotide pyrophosphatase/phosphodiesterase 2	-1.936	Plasma Membrane	enzyme
EPC1	enhancer of polycomb homolog 1 (Drosophila)	-1.503	Nucleus	transcription regulator
EPHA8	EPH receptor A8	1.54	Plasma Membrane	kinase
EPHX1	epoxide hydrolase 1, microsomal (xenobiotic)	-1.519	Cytoplasm	peptidase
F5	coagulation factor V (proaccelerin, labile factor)	-2.727	Plasma Membrane	enzyme
FAM126B	family with sequence similarity 126, member B	1.532	Other	other
FAM13C	family with sequence similarity 13, member C	1.921	Other	other
FAM180A	family with sequence similarity 180, member A	-1.565	Other	other
FAM19A4	family with sequence similarity 19 (chemokine (C-C motif)-like), member A4	1.874	Extracellular Space	other
FARSA	phenylalanyl-tRNA synthetase, alpha subunit	1.539	Cytoplasm	enzyme
FMOD	fibromodulin	-1.922	Extracellular Space	other
FOLR1	folate receptor 1 (adult)	-2.871	Plasma Membrane	transporter
FRMD7	FERM domain containing 7	1.534	Plasma Membrane	other
Fthl17 (includes others)	ferritin, heavy polypeptide-like 17	-1.577	Cytoplasm	other
FZD10	frizzled class receptor 10	1.712	Plasma Membrane	G-protein coupled receptor
GABRA6	gamma-aminobutyric acid (GABA) A receptor, alpha 6	2.048	Plasma Membrane	ion channel
GADD45GIP1	growth arrest and DNA-damage-inducible, gamma interacting protein 1	-1.495	Nucleus	other
GALNT5	polypeptide N-acetylgalactosaminyltransferase 5	2.438	Cytoplasm	enzyme
GATA3	GATA binding protein 3	1.766	Nucleus	transcription regulator
GBX2	gastrulation brain homeobox 2	1.986	Nucleus	transcription regulator
GCKR	glucokinase (hexokinase 4) regulator	1.695	Nucleus	other
GFAP	glial fibrillary acidic protein	-1.694	Cytoplasm	other
Gm2000	ribosomal protein L35 pseudogene	1.556	Other	other
Gm2837	spindlin family, member 2 pseudogene	-1.529	Other	other
Gm5481	predicted gene 5481	1.587	Other	other
Gm5486	predicted gene 5486	-1.924	Other	other
Gm5590	predicted gene 5590	5.693	Other	other
Gm5878	predicted gene 5878	1.626	Other	other
Gm10804	predicted gene 10804	2.687	Other	other
Gm13112	predicted gene 13112	1.551	Other	other
Gm14461	predicted gene 14461	-1.661	Other	other
Gm16505	predicted gene 16505	-1.519	Other	other
Gm16527	predicted gene, 16527	-4.873	Other	other
Gm32296	predicted gene, 32296	1.606	Other	other
Gm34583	predicted gene, 34583	1.787	Other	other
GNG8	guanine nucleotide binding protein (G protein), gamma 8	2.199	Plasma Membrane	enzyme
GNL2	guanine nucleotide binding protein-like 2 (nucleolar)	1.508	Nucleus	enzyme
GOLGB1	golgin B1	-1.945	Cytoplasm	other
GPR151	G protein-coupled receptor 151	1.583	Plasma Membrane	G-protein coupled receptor
GPX8	glutathione peroxidase 8 (putative)	-1.796	Cytoplasm	enzyme
GRIA2	glutamate receptor, ionotropic, AMPA 2	1.526	Plasma Membrane	ion channel
GRID2IP	glutamate receptor, ionotropic, delta 2 (Grid2) interacting protein	1.539	Cytoplasm	other
GRSF1	G-rich RNA sequence binding factor 1	1.693	Cytoplasm	other
GSTM1	glutathione S-transferase mu 1	-1.57	Cytoplasm	enzyme
GUCY2D	guanylate cyclase 2D, membrane (retina-specific)	-1.494	Plasma Membrane	kinase
GYLTL1B	glycosyltransferase-like 1B	-1.502	Cytoplasm	enzyme
H2-M11	histocompatibility 2, M region locus 11	-1.569	Other	other
H2-T10	histocompatibility 2, T region locus 10	-1.662	Other	other
H2AFJ	H2A histone family, member J	-1.738	Cytoplasm	other
HCRT	hypocretin (orexin) neuropeptide precursor	-1.962	Extracellular Space	other
HES3	hes family bHLH transcription factor 3	1.619	Nucleus	other
HGS	hepatocyte growth factor-regulated tyrosine kinase substrate	1.627	Cytoplasm	other
HS3ST5	heparan sulfate (glucosamine) 3-O-sulfotransferase 5	1.524	Cytoplasm	enzyme
HSPBAP1	HSPB (heat shock 27kDa) associated protein 1	-2.789	Other	other
IFITM3	interferon induced transmembrane protein 3	-2.607	Plasma Membrane	other
IGF2	insulin-like growth factor 2	-2.6	Extracellular Space	growth factor
IGFBP2	insulin-like growth factor binding protein 2, 36kDa	-2.174	Extracellular Space	other
IGFBPL1	insulin-like growth factor binding protein-like 1	-1.907	Other	other
IGHA1	immunoglobulin heavy constant alpha 1	-2.513	Extracellular Space	other
Ighg	Immunoglobulin heavy chain (gamma polypeptide)	-1.958	Extracellular Space	other
Ighv15-2	immunoglobulin heavy variable V15-2	-1.495	Other	other
Igkv4-53	immunoglobulin kappa variable 4-53	-1.576	Other	other
Igkv4-57-1	immunoglobulin kappa variable 4-57-1	-1.768	Other	other
Igkv6-14	immunoglobulin kappa variable 6-14	-1.655	Other	other
Iglc2	immunoglobulin lambda constant 2	-1.536	Other	other
IL10	interleukin 10	-1.617	Extracellular Space	cytokine
IL12RB1	interleukin 12 receptor, beta 1	1.503	Plasma Membrane	transmembrane receptor
IL17RC	interleukin 17 receptor C	-1.651	Plasma Membrane	transmembrane receptor
IL4I1	interleukin 4 induced 1	1.737	Cytoplasm	enzyme
INADL	InaD-like (Drosophila)	2.089	Plasma Membrane	other
INMT	indolethylamine N-methyltransferase	-1.56	Cytoplasm	enzyme
INPP5E	inositol polyphosphate-5-phosphatase, 72 kDa	-2.328	Cytoplasm	phosphatase
INVS	inversin	1.514	Nucleus	transcription regulator
IRAK2	interleukin-1 receptor-associated kinase 2	-1.671	Plasma Membrane	kinase
IRX1	iroquois homeobox 1	2.38	Nucleus	transcription regulator
IRX2	iroquois homeobox 2	2.133	Nucleus	transcription regulator
IRX3	iroquois homeobox 3	1.736	Nucleus	transcription regulator
KCNE2	potassium channel, voltage gated subfamily E regulatory beta subunit 2	-2.89	Plasma Membrane	ion channel
KCNJ13	potassium channel, inwardly rectifying subfamily J, member 13	-3.688	Plasma Membrane	ion channel
KCNK16	potassium channel, two pore domain subfamily K, member 16	-1.507	Plasma Membrane	ion channel
KCTD11	potassium channel tetramerization domain containing 11	-1.581	Cytoplasm	other
KIF5C	kinesin family member 5C	3.842	Cytoplasm	other
Kis2	Kaplan integration site 2	-1.836	Other	other
KITLG	KIT ligand	1.516	Extracellular Space	growth factor
KL	klotho	-2.119	Extracellular Space	enzyme
KLHL32	kelch-like family member 32	-2.49	Other	other
KRT8	keratin 8, type II	-1.776	Cytoplasm	other
KY	kyphoscoliosis peptidase	1.507	Cytoplasm	other
LBP	lipopolysaccharide binding protein	-4.736	Plasma Membrane	transporter
LEF1	lymphoid enhancer-binding factor 1	2.201	Nucleus	transcription regulator
LGALS3BP	lectin, galactoside-binding, soluble, 3 binding protein	-1.848	Plasma Membrane	transmembrane receptor
LHX5	LIM homeobox 5	1.715	Nucleus	transcription regulator
LINGO4	leucine rich repeat and Ig domain containing 4	1.76	Other	other
LIPI	lipase, member I	1.673	Extracellular Space	enzyme
LOC547349	MHC class I family member	-1.722	Other	other
LOXL1	lysyl oxidase-like 1	-1.507	Extracellular Space	enzyme
LRP4	low density lipoprotein receptor-related protein 4	-1.544	Extracellular Space	other
LY6E	lymphocyte antigen 6 complex, locus E	-1.549	Plasma Membrane	other
LYPD6B	LY6/PLAUR domain containing 6B	1.579	Other	other
LYZL1	lysozyme-like 1	-1.628	Other	enzyme
MACC1	metastasis associated in colon cancer 1	-1.502	Nucleus	other
MAPK1	mitogen-activated protein kinase 1	1.522	Cytoplasm	kinase
MCF2	MCF.2 cell line derived transforming sequence	1.566	Cytoplasm	other
MED16	mediator complex subunit 16	3.407	Nucleus	transcription regulator
Meis1	Meis homeobox 1	1.527	Nucleus	transcription regulator
MGP	matrix Gla protein	-1.764	Extracellular Space	other
MSX1	msh homeobox 1	-1.609	Nucleus	transcription regulator
MTMR14	myotubularin related protein 14	-1.665	Cytoplasm	phosphatase
MUTYH	mutY homolog	-2.107	Nucleus	enzyme
MVD	mevalonate (diphospho) decarboxylase	-1.531	Cytoplasm	enzyme
MYL6B	myosin, light chain 6B, alkali, smooth muscle and non-muscle	3.135	Cytoplasm	other
NEIL2	nei endonuclease VIII-like 2 (E. coli)	1.594	Nucleus	enzyme
NHLH2	nescient helix loop helix 2	1.514	Nucleus	other
NHSL1	NHS-like 1	1.652	Other	other
NID2	nidogen 2 (osteonidogen)	-1.55	Extracellular Space	other
NLRX1	NLR family member X1	-1.501	Cytoplasm	other
NOD1	nucleotide-binding oligomerization domain containing 1	1.668	Cytoplasm	other
NPPA	natriuretic peptide A	1.562	Extracellular Space	other
NR4A3	nuclear receptor subfamily 4, group A, member 3	-3.229	Nucleus	ligand-dependent nuclear receptor
NTF4	neurotrophin 4	-1.502	Extracellular Space	growth factor
NUP153	nucleoporin 153kDa	1.805	Nucleus	transporter
OCA2	oculocutaneous albinism II	-1.519	Plasma Membrane	transporter
Olfr116	olfactory receptor 116	-1.603	Plasma Membrane	G-protein coupled receptor
Olfr159	olfactory receptor 159	-1.509	Plasma Membrane	G-protein coupled receptor
Olfr345	olfactory receptor 345	1.882	Plasma Membrane	G-protein coupled receptor
Olfr381	olfactory receptor 381	1.639	Plasma Membrane	G-protein coupled receptor
Olfr904	olfactory receptor 904	-1.647	Plasma Membrane	G-protein coupled receptor
Olfr1214	olfactory receptor 1214	-1.529	Plasma Membrane	G-protein coupled receptor
Olfr1339	olfactory receptor 1339	-1.723	Plasma Membrane	G-protein coupled receptor
Olfr1508	olfactory receptor 1508	-1.767	Plasma Membrane	G-protein coupled receptor
OR2Z1	olfactory receptor, family 2, subfamily Z, member 1	-1.544	Plasma Membrane	G-protein coupled receptor
OR52M1	olfactory receptor, family 52, subfamily M, member 1	-1.603	Plasma Membrane	G-protein coupled receptor
PALD1	phosphatase domain containing, paladin 1	-1.521	Cytoplasm	phosphatase
PARVG	parvin, gamma	-1.759	Cytoplasm	other
PCOLCE	procollagen C-endopeptidase enhancer	-1.586	Extracellular Space	other
PCP2	Purkinje cell protein 2	3.835	Cytoplasm	other
PDE6H	phosphodiesterase 6H, cGMP-specific, cone, gamma	-1.774	Cytoplasm	enzyme
PDP1	pyruvate dehyrogenase phosphatase catalytic subunit 1	1.714	Cytoplasm	phosphatase
PICK1	protein interacting with PRKCA 1	-1.499	Cytoplasm	enzyme
PLA2G5	phospholipase A2, group V	-1.959	Extracellular Space	enzyme
PLAC8	placenta-specific 8	-1.721	Nucleus	other
PLCB4	phospholipase C, beta 4	1.702	Cytoplasm	enzyme
PLSCR5	phospholipid scramblase family, member 5	1.576	Other	other
PLTP	phospholipid transfer protein	-1.722	Extracellular Space	enzyme
PMCH	pro-melanin-concentrating hormone	-2.795	Extracellular Space	other
POT1	protection of telomeres 1	1.51	Nucleus	other
POU4F1	POU class 4 homeobox 1	2.132	Nucleus	transcription regulator
Ppnr	per-pentamer repeat gene	1.537	Other	other
PPP1R2	protein phosphatase 1, regulatory (inhibitor) subunit 2	1.604	Cytoplasm	phosphatase
PRKCH	protein kinase C, eta	1.614	Cytoplasm	kinase
Prm1	protamine 1	-2.709	Nucleus	other
PROCR	protein C receptor, endothelial	-1.55	Plasma Membrane	other
PSMB8	proteasome (prosome, macropain) subunit, beta type, 8	-1.532	Cytoplasm	peptidase
PSMB9	proteasome (prosome, macropain) subunit, beta type, 9	-1.544	Cytoplasm	peptidase
PTCH2	patched 2	-1.537	Plasma Membrane	transmembrane receptor
PTGS2	prostaglandin-endoperoxide synthase 2 (prostaglandin G/H synthase and cyclooxygenase)	1.505	Cytoplasm	enzyme
PTPN14	protein tyrosine phosphatase, non-receptor type 14	-1.9	Cytoplasm	phosphatase
PVRL4	poliovirus receptor-related 4	-4.263	Plasma Membrane	other
RAB20	RAB20, member RAS oncogene family	-1.51	Cytoplasm	enzyme
RAB37	RAB37, member RAS oncogene family	2.647	Cytoplasm	enzyme
RALGPS2	Ral GEF with PH domain and SH3 binding motif 2	1.759	Other	other
RAMP3	receptor (G protein-coupled) activity modifying protein 3	3.002	Plasma Membrane	transporter
RAX	retina and anterior neural fold homeobox	-1.625	Nucleus	transcription regulator
RBP1	retinol binding protein 1, cellular	-1.82	Extracellular Space	transporter
RDH5	retinol dehydrogenase 5 (11-cis/9-cis)	-1.602	Cytoplasm	enzyme
RGS4	regulator of G-protein signaling 4	1.612	Cytoplasm	other
RGS8	regulator of G-protein signaling 8	1.864	Cytoplasm	other
Rhox3a (includes others)	reproductive homeobox 3A	1.703	Other	other
Rhox6/Rhox9	reproductive homeobox 9	-1.524	Other	other
RILP	Rab interacting lysosomal protein	-1.5	Cytoplasm	other
Rn18s	18S ribosomal RNA	2.425	Other	other
RND1	Rho family GTPase 1	1.501	Cytoplasm	enzyme
RORA	RAR-related orphan receptor A	1.636	Nucleus	ligand-dependent nuclear receptor
SAMD4A	sterile alpha motif domain containing 4A	1.528	Cytoplasm	translation regulator
SCG2	secretogranin II	1.504	Extracellular Space	cytokine
Scgb1c1	secretoglobin, family 1C, member 1	2.417	Other	other
SCUBE1	signal peptide, CUB domain, EGF-like 1	1.739	Plasma Membrane	transmembrane receptor
SEC14L3	SEC14-like 3 (S. cerevisiae)	1.622	Extracellular Space	transporter
SECISBP2L	SECIS binding protein 2-like	1.722	Other	other
SELPLG	selectin P ligand	-1.673	Plasma Membrane	other
SEMA3B	sema domain, immunoglobulin domain (Ig), short basic domain, secreted, (semaphorin) 3B	-1.776	Extracellular Space	other
SERINC2	serine incorporator 2	-1.786	Plasma Membrane	transporter
SERPINF2	serpin peptidase inhibitor, clade F (alpha-2 antiplasmin, pigment epithelium derived factor), member 2	-1.532	Extracellular Space	other
SERPING1	serpin peptidase inhibitor, clade G (C1 inhibitor), member 1	-1.756	Extracellular Space	other
SFRP1	secreted frizzled-related protein 1	-1.529	Plasma Membrane	transmembrane receptor
Sh3bgr	SH3-binding domain glutamic acid-rich protein	1.677	Cytoplasm	other
SHANK1	SH3 and multiple ankyrin repeat domains 1	1.646	Cytoplasm	other
SLC12A8	solute carrier family 12, member 8	1.517	Other	transporter
SLC13A4	solute carrier family 13 (sodium/sulfate symporter), member 4	-1.681	Plasma Membrane	transporter
SLC14A2	solute carrier family 14 (urea transporter), member 2	-2.374	Plasma Membrane	transporter
SLC16A8	solute carrier family 16 (monocarboxylate transporter), member 8	-2.383	Plasma Membrane	transporter
SLC17A6	solute carrier family 17 (vesicular glutamate transporter), member 6	1.735	Plasma Membrane	transporter
SLC18A3	solute carrier family 18 (vesicular acetylcholine transporter), member 3	1.671	Plasma Membrane	transporter
SLC35D1	solute carrier family 35 (UDP-GlcA/UDP-GalNAc transporter), member D1	1.525	Cytoplasm	transporter
SLC35E1	solute carrier family 35, member E1	-1.572	Other	other
SLC38A11	solute carrier family 38, member 11	1.669	Other	transporter
SLC39A4	solute carrier family 39 (zinc transporter), member 4	-1.901	Plasma Membrane	transporter
SLC48A1	solute carrier family 48 (heme transporter), member 1	1.746	Other	other
SLC4A2	solute carrier family 4 (anion exchanger), member 2	-1.857	Plasma Membrane	transporter
SLC4A5	solute carrier family 4 (sodium bicarbonate cotransporter), member 5	-2.597	Plasma Membrane	transporter
SLC6A20	solute carrier family 6 (proline IMINO transporter), member 20	-1.498	Plasma Membrane	transporter
SLC7A5	solute carrier family 7 (amino acid transporter light chain, L system), member 5	2.391	Plasma Membrane	transporter
SLC7A8	solute carrier family 7 (amino acid transporter light chain, L system), member 8	1.732	Plasma Membrane	transporter
Slc7a15	solute carrier family 7 (cationic amino acid transporter, y+ system), member 15	-3.011	Other	transporter
SLITRK6	SLIT and NTRK-like family, member 6	2.671	Plasma Membrane	other
SORBS3	sorbin and SH3 domain containing 3	-1.591	Cytoplasm	other
SOSTDC1	sclerostin domain containing 1	-2.345	Extracellular Space	other
SPARC	secreted protein, acidic, cysteine-rich (osteonectin)	1.581	Extracellular Space	other
SPEF2	sperm flagellar 2	1.557	Other	other
SRGAP1	SLIT-ROBO Rho GTPase activating protein 1	1.541	Cytoplasm	other
SRPK2	SRSF protein kinase 2	2.59	Nucleus	kinase
ST6GALNAC2	ST6 (alpha-N-acetyl-neuraminyl-2,3-beta-galactosyl-1,3)-N-acetylgalactosaminide alpha-2,6-sialyltransferase 2	-1.794	Cytoplasm	enzyme
STEAP1	six transmembrane epithelial antigen of the prostate 1	-2.652	Plasma Membrane	transporter
SULF1	sulfatase 1	-3.483	Cytoplasm	enzyme
SYT6	synaptotagmin VI	1.795	Cytoplasm	transporter
SYT9	synaptotagmin IX	1.826	Plasma Membrane	transporter
TAC1	tachykinin, precursor 1	1.592	Extracellular Space	other
TBC1D8B	TBC1 domain family, member 8B (with GRAM domain)	1.587	Other	other
TCF7L2	transcription factor 7-like 2 (T-cell specific, HMG-box)	3.16	Nucleus	transcription regulator
TEX11	testis expressed 11	1.982	Nucleus	other
TEX22	testis expressed 22	-2.427	Cytoplasm	other
TIMD4	T-cell immunoglobulin and mucin domain containing 4	-1.965	Plasma Membrane	other
TJAP1	tight junction associated protein 1 (peripheral)	-1.642	Plasma Membrane	other
TLL1	tolloid-like 1	1.657	Extracellular Space	peptidase
TM2D3	TM2 domain containing 3	1.974	Other	other
TMEM27	transmembrane protein 27	-1.513	Plasma Membrane	other
TMEM72	transmembrane protein 72	-2.947	Other	other
TMEM104	transmembrane protein 104	-1.55	Other	transporter
TMEM119	transmembrane protein 119	-1.74	Cytoplasm	other
TMEM8C	transmembrane protein 8C	-1.551	Plasma Membrane	other
TMPRSS11A	transmembrane protease, serine 11A	-1.921	Other	peptidase
TNFRSF1A	tumor necrosis factor receptor superfamily, member 1A	-1.608	Plasma Membrane	transmembrane receptor
TNNT1	troponin T type 1 (skeletal, slow)	5.638	Cytoplasm	other
TRH	thyrotropin-releasing hormone	1.764	Extracellular Space	other
Trim12a	tripartite motif-containing 12A	-1.523	Cytoplasm	other
TRPM3	transient receptor potential cation channel, subfamily M, member 3	-2.156	Plasma Membrane	ion channel
TRPV4	transient receptor potential cation channel, subfamily V, member 4	-2.79	Plasma Membrane	ion channel
TRUB1	TruB pseudouridine (psi) synthase family member 1	-1.802	Other	enzyme
TTI1	TELO2 interacting protein 1	1.749	Cytoplasm	other
TTLL3	tubulin tyrosine ligase-like family member 3	-1.499	Extracellular Space	enzyme
TTR	transthyretin	-2.102	Extracellular Space	transporter
TUBA1C	tubulin, alpha 1c	-1.584	Cytoplasm	other
UBD	ubiquitin D	-1.954	Nucleus	other
UBLCP1	ubiquitin-like domain containing CTD phosphatase 1	1.973	Nucleus	phosphatase
UBQLN3	ubiquilin 3	-1.582	Cytoplasm	other
USP8	ubiquitin specific peptidase 8	-1.501	Cytoplasm	peptidase
VAMP8	vesicle-associated membrane protein 8	-1.502	Plasma Membrane	transporter
VCAM1	vascular cell adhesion molecule 1	-1.559	Plasma Membrane	transmembrane receptor
VGF	VGF nerve growth factor inducible	1.565	Extracellular Space	growth factor
Vmn1r65	vomeronasal 1 receptor 65	1.664	Plasma Membrane	other
Vmn1r180 (includes others)	vomeronasal 1 receptor 180	1.642	Other	other
WBP2	WW domain binding protein 2	1.522	Cytoplasm	other
WBP11	WW domain binding protein 11	1.751	Nucleus	phosphatase
WDR63	WD repeat domain 63	-1.925	Other	other
WFDC2	WAP four-disulfide core domain 2	-1.935	Extracellular Space	other
WFDC8	WAP four-disulfide core domain 8	-1.507	Extracellular Space	other
WNT3	wingless-type MMTV integration site family, member 3	1.828	Extracellular Space	other
WNT9A	wingless-type MMTV integration site family, member 9A	1.85	Extracellular Space	other
WNT9B	wingless-type MMTV integration site family, member 9B	1.793	Extracellular Space	other
XKR7	XK, Kell blood group complex subunit-related family, member 7	1.853	Other	other
ZDHHC22	zinc finger, DHHC-type containing 22	1.628	Other	other
Zfp114	zinc finger protein 114	1.604	Other	other
ZNF14	zinc finger protein 14	2.175	Nucleus	transcription regulator
ZNF667	zinc finger protein 667	-4.593	Nucleus	other

## Sheet: Table S8
Symbol	Entrez Gene Name	FC TgVD+ Cortex	FC TgVD+ Hippoc	FC WtVD+ Cortex	FC WtVD+ Hippocampus
AHCY	adenosylhomocysteinase	2.071	1.794	-2.065	-1.724
ATG4C	autophagy related 4C, cysteine peptidase	4.817	4.494	-2.75	-2.715
AVP	arginine vasopressin	3.958	1.73	2.211	-1.586
C130078N14	uncharacterized protein C130078N14	2.767	3.922	-2.166	-2.134
CDK5RAP1	CDK5 regulatory subunit associated protein 1	2.924	2.661	-2.138	-1.783
CPNE1	copine I	1.705	1.599	-1.821	-1.561
DNAJB8	DnaJ (Hsp40) homolog, subfamily B, member 8	-1.732	-1.916	1.977	-1.847
FAM205A	family with sequence similarity 205, member A	-1.553	1.607	2.777	2.341
FKBP1A	FK506 binding protein 1A, 12kDa	-1.519	-1.72	1.621	1.97
GBP6	guanylate binding protein family, member 6	-3.234	-2.654	2.206	2.193
Gm4924	predicted gene 4924	1.53	2.142	1.942	1.684
HLA-DRB5	major histocompatibility complex, class II, DR beta 5	-2.336	-2.526	1.525	1.857
Iqcf4	IQ motif containing F4	-1.733	-1.544	2.216	2.74
IQSEC3	IQ motif and Sec7 domain 3	1.575	-3.299	4.493	-5.233
KCNJ6	potassium channel, inwardly rectifying subfamily J, member 6	-1.666	-1.793	1.931	1.61
KDR	kinase insert domain receptor	-1.643	1.528	1.683	-1.599
Mirg	miRNA containing gene	-1.682	-3.412	1.88	-1.911
NANOG	Nanog homeobox	-1.659	-1.516	1.526	-2.906
OCEL1	occludin/ELL domain containing 1	3.214	3.522	-3.981	-3.071
OMP	olfactory marker protein	1.655	3.175	-10.412	-1.542
OXT	oxytocin/neurophysin I prepropeptide	4.737	2.034	4.04	-2.749
PPP1R16B	protein phosphatase 1, regulatory subunit 16B	-1.776	-1.779	2.387	2.293
PRKCD	protein kinase C, delta	1.653	1.837	-2.522	-2.184
PRL	prolactin	10.541	10.069	-1.878	1.929
RNASE4	ribonuclease, RNase A family, 4	-2.065	-2.142	2.123	1.61
SDC4	syndecan 4	-1.805	-1.906	1.948	2.384
Serpina3g (includes others)	serine (or cysteine) peptidase inhibitor, clade A, member 3G	-2.421	-1.798	1.944	2.778
ZNF669	zinc finger protein 669	2.197	1.839	-1.898	-2.079
