# Supplementary material for: Vitamin D interacts with Esr1 and Igf1 to regulate molecular pathways relevant to Alzheimer’s disease
Source: Mol Neurodegener. 2016 Mar 1;11:22. doi: 10.1186/s13024-016-0087-2 (PMC4774101; doi:10.1186/s13024-016-0087-2)
Supplement: Additional file 4: — List of canonical pathways modified by a vitamin D3-enriched diet in Wt and Tg animals. Table S10. Common canonical pathways between Wt and Tg mice supplemented with vitamin D3 and associated DEGs. Table S11. Canonical pathways specifically modified in Wt VitD animals. Table S12. Canonical pathways specifically modified in Tg VitD animals. (XLSX 67 kb) [file 13024_2016_87_MOESM4_ESM.xlsx]

## Sheet: Table S10
Common canonical pathways	Wild type mice			Transgenic mice
	list of genes	ratio	p value	list of genes	ratio	p value
Nervous system
Axonal guidance signaling	ACE, ADAM11, ADAMTS2, ADAMTS9, ARHGEF11, ARPC4 BDNF, BMP1, CFL1, CFL2, EFNA1, EGF, GNAL, GNG4, GNG7, HERC2, IGF1, ITGA3, ITGA4, ITGA5, MAPK3, MRAS, MYL1, MYL4, MYL10, NTNG1, PFN1, PGF, PIK3R2, PLCB1, PLCB4, PLCH2, PRKAR2A, PRKCD, PRKD3, PTCH1, PTCH2, RAC3, SDCBP, SEMA3C, SEMA4G, SEMA6B, SEMA6C, SMO, SRGAP2, TUBA3E, TUBB3, TUBB6, Wasl, WNT1, WNT6, WNT16, WNT9B	53/405 (0,131)	0.00394	ACE, ADAMTS8, BMP6, CFL1, ECEL1, EGF, EPHA8, FIGF, FZD10, GLI1, GNAO1, GNAS, GNG7, HERC2, IGF1, KALRN, MAPK1, MMP9, MYL1, MYL7, MYL6B, NTF3, NTNG1, PAPPA2, PLCB4, PRKCD, PRKCH, PTCH2, RND1, SEMA3B, SLIT1, SRGAP1, SRGAP3, VEGFC, WNT3, WNT6, WNT9A, WNT9B	38/405 (0,094)	0.000488
Wnt/β-catenin signaling	BMPR2, CDKN2A, CREBBP, CSNK1A1, CSNK1G2, DVL3, EP300, HDAC1, LEF1, LRP6, MARK2, MYC, PPM1J, PPP2R2B, RARB, SMO, SOX1, SOX10, SOX13, TCF3, TCF4, TGFB1, TGFBR1, TLE1, WNT1, WNT6, WNT16, WNT9B	28/163 (0,172)	0.000688	AXIN2, CDH1, DVL3, FZD10, GNAO1, LEF1, LRP6, NR5A2, RARB, SFRP1, SFRP5, TCF7L2, TGFBR2, UBD, WIF1, WNT3, WNT6, WNT9A, WNT9B	19/163 (0,117)	0.00107
Corticotropin releasing hormone signaling	BDNF, CREB1, CREBBP, CRHR2, EP300, FOS, GUCY1A2, KRT1, MAPK3, MEF2A, MEF2B, NOS2, NR4A1, PRKAR2A, PRKCD, PRKD3, PTCH1, PTCH2, PTGS2, SMO	20/105 (0,19)	0.00105	ADCY5, CRHR2, FOS, GLI1, GNAO1, GNAS, GUCY2D, ITPR2, MAPK1, NR4A1, POMC, PRKCD, PRKCH, PTCH2, PTGS2, UCN3	16/105 (0,152)	0.000129
Neuroprotective role of THOP1 in Alzheimer's disease	ACE, CREB1, ECE1, HLA-A, NFYA, PDYN, PRKAR2A, THOP1	8/34 (0,235)	0.00945	ACE, AGT, HLA-A, HLA-E, MMP9, NTS, TAC1	7/34 (0,206)	0.00178
Synaptic long term potentiation (WT) Synaptic long term depression (Tg)	CAMK2B, CREB1, CREBBP, EP300, GRIA1, GRIN1, GRIN2A, GRM5, MAPK3, MRAS, PLCB1, PLCB4, PLCH2, PPP1R14A, PPP1R14C, PRKAR2A, PRKCD, PRKD3	18/114 (0,158)	0.0137	GNAO1, GNAS, GRIA2, GRM5, GUCY2D, IGF1, ITPR2, MAPK1, PLA2G3, PLA2G5, PLA2G4E, PLCB4, PRKCD, PRKCH	14/130 (0,108)	0.00925
Glioblastoma multiforme signaling	CDKN2A,EGF,IGF1, IGF2, LEF1, MAPK3, MRAS, MYC, NF2, PIK3R2, PLCB1, PLCB4, PLCH2, PRKCD, RHOH, SMO, TCF3, WNT1, WNT6, WNT16, WNT9B	21/142 (0,148)	0.0168	EGF, FNBP1, FZD10, IGF1, IGF2, ITPR2, LEF1, MAPK1, PLCB4, PRKCD, WNT3, WNT6, WNT9A, WNT9B	14/142 (0,099)	0.019
Melatonin signaling	CAMK2B, MAP2K4, MAPK3, MTNR1A, PLCB1, PLCB4, PLCH2, PRKAR2A, PRKCD, PRKD3, SLC2A4	11/66 (0,167)	0.0336	GNAO1, MAPK1, PLCB4, PRKCD, PRKCH, RORA, RORB, RORC	8/66 (0,121)	0.0232
Immune system
Agranulocyte adhesion and diapedesis	ACTA2, AOC3, Ccl7, Ccl8, CCL21, CD34, CLDN4, CXCL6, IL1RN, ITGA3, ITGA4, ITGA5, MYH1, MYH3, MYH4, MYH8, MYL1, MYL4, PODXL2, Ppbp, SDC4, SELE, SELP, TNFRSF1A	24/156 (0,154)	0.00689	ACTA2, CCL2, CCL4, Ccl6, Ccl7, Ccl8, CCL17, CCL21, CLDN2, CLDN3, CLDN4, Cxcl9, CXCL10, CXCL13, ITGB2, MMP9, MYL1, MYL7, MYL6B, SDC4, SELPLG, TNFRSF1A, VCAM1	24/156 (0,154)	2.5e-06
Communication between innate and adaptative immune cells	CD4, CSF2, HLA-A, HLA-DRB5, IGHA1, IL6, IL1RN, TLR1, TLR2, TLR7	10/60 (0,167)	0.0416	CCL4, CD4, CD40LG, CSF2, CXCL10, HLA-A, HLA-DRB5, HLA-E, IGHA1, IL10	10/60 (0,167)	0.00115
Role of macrophages, fibroblasts and endothelial cells in rheumatoid arthritis	CAMK2B, CREB1, CREBBP, CSF1, CSF2, CSNK1A1, EP300, FCGR3A/FCGR3B, FGF2, FOS, IL6, IL1RN, IRAK2, LEF1, LRP6, MAP2K4, MAPK3, MRAS, MYC, NOS2, PGF, PIK3R2, PLCB1, PLCB4, PLCH2, PRKCD, PRKD3, ROR2, SELE, SMO, TCF3, TCF4, TGFB1, TLR1, TLR2, TLR7, TNFRSF1A, TRAF4, WNT1, WNT6, WNT16, WNT9B	42/277 (0,152)	0.000607	CCL2, CSF2, FIGF, FOS, FZD10, GNAO1, IL10, IL17RC, IRAK2, LEF1, LRP6, MAPK1, PLCB4, PRKCD, PRKCH, Prss1 (includes others), SFRP1, SFRP5, TCF7L2, TNFRSF1A, VCAM1, VEGFC, WIF1, WNT3, WNT6, WNT9A, WNT9B	27/277 (0,097)	0.00177
Role of IL17F in inflammatory diseases	CREB1, CREBBP, CSF2, CXCL6, EP300, IGF1, IL6, MAPK3, RPS6KA3	9/37 (0,243)	0.00478	CCL2, CCL4, CSF2, CXCL10, IGF1, IL17RC, MAPK1	7/37 (0,189)	0.00297
Role of 17A in psoriasis	CXCL6, S100A8, S100A9	3/8 (0,375)	0.0292	IL17RC, S100A8, S100A9	3/8 (0,375)	0.00686
Dendritic cell maturation	CD1D, CREB1, CREBBP, CSF2, DDR1, EP300, FCGR2B, FCGR3A/FCGR3B, HLA-A, HLA-DRB5, IL6, IL1RN, LEPR, MAP2K4, MAPK3, PIK3R2, PLCB1, PLCB4, PLCH2, TLR2, TNFRSF1A	21/145 (0,145)	0.0208	CD40LG, CSF2, HLA-A, HLA-DOA, HLA-DQA1, HLA-DQB1, HLA-DRB5, IL10, LEP, LEPR, LY75, MAPK1, PLCB4, TNFRSF1A	14/ 145 (0,097)	0.0223
Complement system	C3, C6, C1QB, C1R, CD46, CFH, MASP2	7/32 (0,219)	0.0219	C1QB, C1QC, C1R, ITGB2, SERPING1	5/32 (0,156)	0.0256
MIF regulation of innate immunity	CD74, FOS, MAP2K4, MAPK3, NOS2, PLA2G2F, PTGS2	7/36 (0,194)	0.0398	CD74, FOS, MAPK1, PLA2G3, PLA2G5, PLA2G4E, PTGS2	7/36 (0,194)	2,52 E-03
Altered T cell and B cell signaling in rheumatoid arthritis	CCL21, CD79A, CSF1, CSF2, FAS, HLA-DRB5, IL6, IL1RN, TGFB1, TLR1, TLR2, TLR7	12/73 (0,164)	0.03	CCL21, CD40LG, CSF2, CXCL13, HLA-DOA, HLA-DQA1, HLA-DQB1, HLA-DRB5, IL10	0.123	0.015
Others
Hepatic fibrosis / hepatic stellate cell activation	ACTA2, CCL21, CCR5, COL11A1, COL16A1, COL23A1, COL25A1 CSF1, ECE1, EDN1, EGF, FAS, FGF2, IGF1, IGF2, IL6, KDR, LAMA1, LEPR, MYH1, MYH3, MYH4, MYH8, MYL1, MYL4, PGF, TGFB1, TGFBR1, TIMP1, TNFRSF1A	30/170 (0,176)	0.000281	ACTA2, AGT, CCL2, CCL21, CD40LG, COL25A1, COL4A1, COL6A3, COL8A1, COL8A2, COL9A1, EGF, FIGF, IGF1, IGF2, IL10, KDR, LBP, LEP, LEPR, MMP9, MYL1, MYL7, MYL6B, TGFBR2, TNFRSF1A, VCAM1, VEGFC	28/170 (0,165)	8.57e-08
ILK signaling	ACTA2, ACTN1, ACTN2, CFL1, CFL2, CREB1, CREBBP, DSP, EP300, FOS, IRS1, Irs4, ITGB8, KRT18, LEF1, MAP2K4, MAPK3, MYC, MYH1, MYH3, MYH4, MYH8, MYL1, MYL4, NOS2, PGF, PIK3R2, PPM1J, PPP2R2B, PTGS2, RHOH, SH2B2, TNFRSF1A	33/169 (0,195)	1.78e-05	ACTA2, CDH1, CFL1, DSP, FIGF, FNBP1, FOS, ITGB2, KRT18, LEF1, MAPK1, MMP9, MYL1, MYL7, MYL6B, PTGS2, SNAI1, TNFRSF1A, VEGFC	19/169 (0,112)	0.00164
Protein kinase A signaling	AKAP6, AKAP7, AKAP11, AKAP13, CAMK2B, CDC27, CREB1, CREBBP, DUSP18, EP300, GNG4, GNG7, LEF1, MAP3K1, MAPK3, MYH4, MYL1, MYL4, MYL10, MYLK3, PDE1A, PDE3B, PDE4A, PDE5A, PDE6G, PDE6H, PLCB1, PLCB4, PLCH2, PPP1R14A, PPP1R14C, PPP1R1B, PRKAR2A, PRKCD, PRKD3, PTCH1, PTCH2, PTGS2, PTPN5, PTPN7, PTPRO, PTPRS, SMO, TCF3, TCF4, TGFB1, TGFBR1, TH, TNNI1, TNNI2, TTN, YWHAB	52/354 (0,147)	0.000321	ADCY5, DUSP1, DUSP8, EYA2, GNAS, GNG7, ITPR2, LEF1, MAPK1, MYL1, MYL7, MYL6B, PDE10A, PDE4B, PDE5A, PDE6H, PDE8B, PLCB4, PPP1R1B, PRKCD, PRKCH, PTCH2, PTGS2, PTPN7, PTPN14, PTPRO, TCF7L2, TGFBR2, TH	29/354 (0,082)	0.0139
Cellular effects of sildenafil (viagra)	ACTA2, CACNA1A, CACNG7, GUCY1A2, KCNQ2, MYH1, MYH3, MYH4, MYH8, MYL1, MYL4, MYL10, NPPA, PDE1A, PDE3B, PDE4A, PDE5A, PLCB1, PLCB4, PLCH2, Ppp1r12b, PRKAR2A	22/117 (0,188)	0.000728	ACTA2, ADCY5, CACNG1, CACNG5, GNAS, GUCY2D, ITPR2, MYL1, MYL6B, MYL7, NPPA, PDE4B, PDE5A, PLCB4, SLC4A5	15/117 (0,128)	0.00134
Human embryonic stem cell pluripotency	BDNF, BMP1, BMPR2, FGF2, FGFR3, FOXD3, KLK3, LEF1, MRAS, NANOG, PIK3R2, S1PR2, SMAD6, SMO, TCF3, TCF4, TDGF1, TGFB1, TGFBR1, WNT1, WNT6, WNT16, WNT9B	23/129 (0,178)	0.00119	BMP6, FZD10, GNAS, KLK3, LEF1, NANOG, NTF3, SPHK1, TCF7L2, TDGF1, TGFBR2, WNT3, WNT6, WNT9A, WNT9B, ZIC3	16/129 (0,124)	0.00135
Transcriptional regulatory network in embryonic stem cells	EOMES, FOXD3, GBX2, HESX1, HOXB1, ISL1, LHX5, NANOG, RIF1	9/38 (0,237)	0.00577	EOMES, FOXC1, GBX2, LHX5, NANOG, SIX3, ZIC3	7/38 (0,184)	0.00348
Aryl hydrocarbon receptor signaling	ALDH1A2, ALDH3A1, ALDH6A1, CCNA1, CCND3, CDKN2A, EP300, ESR1, FAS, FOS, GSTA5, Gstm3, IL6, MAPK3, MGST1, MYC, NFIC, NFIX, RARB, RXRG, TGFB1, TRIP11	22/130 (0,169)	0.00298	ALDH1A2, ALDH1A3, CTSD, CYP1B1, DCT, ESR1, FOS, GSTM1, HSPB3, MAPK1, RARB, RXRG, TP73	13/130 (0,1)	0.0209
Thyroid cancer signaling	BDNF, KLK3, LEF1, MAPK3, MRAS, MYC, RXRG, TCF3, TCF4	9/38 (0,237)	0.00577	CDH1, CXCL10, KLK3, LEF1, MAPK1, NTF3, RET, RXRG, TCF7L2	9/38 (0,237)	0.000131
LXR/RXR activation	AMBP, APOA2, APOC2, APOD, APOE, C3, IL6, IL1RN, LCAT, LPL, NOS2, PLTP, PTGS2, RXRG, S100A8, SERPINF1, TNFRSF1A, TTR	18/106 (0,17)	0.00657	AGT, CCL2, LBP, MMP9, PLTP, PTGS2, RXRG, S100A8, SERPINA1, SERPINF2, TNFRSF1A, TTR	12/106 (0,113)	0.0105
Role of Wnt/GSK3beta in the pathogenesis of influenza	CSNK1A1, CSNK1G2, DVL3, IFNA4, LEF1, SMO, TCF3, TCF4, WNT1, WNT6, WNT16, WNT9B	12/60 (0,2)	0.00672	DVL3, FZD10, LEF1, TCF7L2, WNT3, WNT6, WNT9A, WNT9B	8/60 (0,133)	0.0136
RAR activation	ACTL6B, ALDH1A2, ARID1A, CARM1, CREBBP, DPF1, EP300, FOS, KAT2B, MAP2K4, MAP3K1, NR2F2, NSD1, PIK3R2, PRKAR2A, PRKCD, PRKD3, RARB, RBP3, RDH5, RDH12, RXRG, SMAD6, SMARCC1, SMARCD1, SORBS3, TGFB1	27/183 (0,148)	0.00764	ADCY5, AKR1C3, ALDH1A2, ALDH1A3, Aldh1a7, DUSP1, FOS, GNAS, MAPK1, NR2F2, NRIP2, PRKCD, PRKCH, RARB, RBP1, RDH5, RXRG, SORBS3	18/183 (0,098)	0.00878
Cdc42 signaling	ARPC4, CFL1, CFL2, DIAPH1, EXOC7, FOS, H2-T3, HLA-A, HLA-DRB5, ITGA3, ITGA4, ITGA5, MAP2K4, MYL1, MYL4, MYL10, PARD3, Ppp1r12b	18/115 (0,157)	0.015	CFL1, FOS, H2-K2/H2-Q9, H2-M2, HLA-A, HLA-DOA, HLA-DQA1, HLA-DQB1, HLA-DRB5, HLA-E, MAPK1, MYL1, MYL7, MYL6B, PARD3	15/115 (0,13)	0.00112
Artherosclerosis signaling	ALOXE3, APOA2, APOC2, APOD, APOE, CSF1, IL6, IL1RN, ITGA4, LCAT, LPL, PLA2G2F, S100A8, SELE, SELP, TGFB1, TNFSF12	17/107 (0,159)	0.0154	CCL2, CD40LG, ITGB2, MMP9, PLA2G3, PLA2G5, PLA2G4E, S100A8, SELPLG, SERPINA1, VCAM1	11/107 (0,103)	0.0268
Colorectal cancer metastasis signaling	EGF, FOS, GNG4, GNG7, IL6, LEF1, LRP6, MAP2K4, MAPK3, MRAS, MYC, NOS2, PGF, PIK3R2, PRKAR2A, PTGS2, RHOH, SMO, TCF3, TCF4, TGFB1, TGFBR1, TLR1, TLR2, TLR7, TNFRSF1A, WNT1, WNT6, WNT16, WNT9B	30/224 (0,134)	0.0191	ADCY5, CDH1, EGF, FIGF, FNBP1, FOS, FZD10, GNAS, GNG7, LEF1, LRP6, MAPK1, MMP9, PTGS2, TCF7L2, TGFBR2, TNFRSF1A, VEGFC, WNT3, WNT6, WNT9A, WNT9B	22/224 (0,098)	0.00411
Basal cell carcinoma signaling	BMP1, DVL3, LEF1, PTCH1, PTCH2, SMO, TCF3, TCF4, WNT1, WNT6, WNT16, WNT9B	12/69 (0,174)	0.02	ADCY5, CDH1, EGF, FIGF, FNBP1, FOS, FZD10, GNAS, GNG7, LEF1, LRP6, MAPK1, MMP9, PTGS2, TCF7L2, TGFBR2, TNFRSF1A, VEGFC, WNT3, WNT6, WNT9A, WNT9B	22/224 (0,098)	0.00411
Sperm motility	CACNA1H, GUCY1A2, LCAT, MRAS, MST1R, NPPA, PDE1A, PDE4A, PLA2G2F, PLCB1, PLCB4, PLCH2, PRKAR2A, PRKCD, PRKD3, PTK7	16/107 (0,15)	0.0308	GNAS, ITPR2, MST1R, NPPA, PDE4B, PLA2G3, PLA2G5, PLA2G4E, PLCB4, PRKCD, PRKCH	11/107 (0,103)	0.0268
Hematopoiesis from pluripotent stem cells	CD4, CSF1, CSF2, IGHA1, IL6, KITLG	6/28 (0,214)	0.0361	CD4, CSF2, IGHA1, IL10, KITLG	5/28 (0,179)	0.0149
Ovarian cancer signaling	CDKN2A, EDN1, EGF, LEF1, MAPK3, MRAS, PA2G4, PGF, PIK3R2, PRKAR2A, PTGS2, SMO, TCF3, TCF4, WNT1, WNT6, WNT16	18/127 (0,142)	0.037	CGA, EGF, FIGF, FZD10, LEF1, MAPK1, MMP9, PTGS2, TCF7L2, VEGFC, WNT3, WNT6, WNT9A, WNT9B	14/127 (0,11)	0.0075
Role of osteoblasts, osteoclasts and chondrocyes in rheumatoid arthritis	BMP1, BMPR2, CSF1, CSF2, CSNK1A1, FOS, IGF1, IL6, IL1RN, ITGA3, ITGA5, LEF1, LRP6, MAP2K4, MAPK3, Naip1, (includes others), PIK3R2, SMAD6, SMO, TCF3, TCF4, TGFB1, TNFRSF1A, WNT1, WNT6, WNT16, WNT9B	27/210 (0,129)	0.0395	BGLAP, BMP6, CALCR, CSF2, CSF1R, FOS, FZD10, IGF1, IL10, LEF1, LRP6, MAPK1, SFRP1, SFRP5, TCF7L2, TNFRSF1A, WIF1, WNT3, WNT6, WNT9A, WNT9B	21/210 (0,1)	0.00405
Fatty acid alpha oxidation	ALDH1A2, ALDH3A1, ALOXE3, PTGS2	4/15 (0,267)	0.0405	ALDH1A2, ALDH1A3, PTGS2	3/15 (0,2)	0.0422
Regulation of epithelial mesenchymal transition pathway	APH1B, DVL3, EGF, FGF2, FGF6, FGF10, FGF23, FGFR3, LEF1, MAP2K4, MAPK3, MRAS, NOTCH1, PIK3R2, SMO, TCF3, TCF4, TGFB1, TGFBR1, WNT1, WNT6, WNT16, WNT9B	23/176 (0,131)	0.0464	CDH1, CLDN3, DVL3, EGF, EGR1, FGF10, FGF13, FZD10, LEF1, MAPK1, MMP9, SNAI1, TCF7L2, TGFBR2, TWIST1, TWIST2, WNT3, WNT6, WNT9A, WNT9B	20/176 (0,114)	0.0011
Factors promoting cardiogenesis in vertebrates	BMP1, BMPR2, LEF1, LRP6, NPPA, PRKCD, PRKD3, SMO, TCF3, TCF4, TDGF1, TGFB1, TGFBR1	13/97 (0,149)	0.0486	BMP6, CER1, FZD10, LEF1, LRP6, NPPA, PRKCD, PRKCH, TCF7L2, TDGF1, TGFBR2, WNT3	12/87 (0,138)	0.00212

## Sheet: Table S11
Wild type specific pathways
	list of genes	ratio	p value
Nervous system
Glucocorticoid receptor signaling	ACTL6B, ANXA1, AR, ARID1A, CREB1, CREBBP, CSF2, DPF1, EP300, ESR1, FOS, IL6, IL1RN, KAT2B, MAP2K4, MAP3K1, MAPK3, MED14, MRAS, NOS2, NPPA, NR3C1, PBX1, PIK3R2, POLR2A, POLR2C, POU2F2, PRL, PTGS2, SCGB1A1, SELE, SLPI, SMARCC1, SMARCD1, TAF3, TAF10, TGFB1,TGFBR1	38/25 (0,149)	0.00149
Neuropathic pain signaling in dorsal horn neurons	BDNF, CAMK1, CAMK2B, CREB1, FOS, GRIA1, GRIN1, GRIN2A, GRM5, KCNQ2, MAPK3, PIK3R2, PLCB1, PLCB4, PLCH2, PRKAR2A, PRKCD, PRKD3	18/93 (0,194)	0.00152
Circadian rhythm signaling	AVP, CREB1, CREBBP, EP300, GRIN1, GRIN2A, NR1D1, PER1, VIPR2	9/32 (0,281)	0.00163
Prolactin signaling	CREBBP, EP300, FOS, IRS1, MAPK3, MRAS, MYC, NR3C1, PIK3R2, PRKCD, PRKD3, PRL, PRLR	13/71 (0,183)	0.0104
RhoA signaling	ACTA2, ARHGAP1, ARHGEF1, ARHGEF11, ARPC4, CFL1, CFL2, CIT, IGF1, MYL1, MYL4, MYL10, MYLK3, PFN1, PIP4K2A, Ppp1r12b, RHPN2, TTN	18/112 (0,161)	0.0115
Huntington disease signaling	ARFIP2, BDNF, CASP14, CREB1, CREBBP, DLG4, EGF, EP300, GNG4, GNG7, GRM5, HAP1, HDAC1, IGF1, MAP2K4, MAP3K10, MAPK3, NSF, PIK3R2, PLCB1, PLCB4, POLR2A, POLR2C, PRKCD, PRKD3, PSME4, RPH3A, VAMP3, VTI1A	29/212 (0,137)	0.0161
Neuregulin signaling	DCN, DLG4, EGF, ITGA3, ITGA4, ITGA5, MAPK3, MRAS, MYC, PICK1, PIK3R2, PRKCD, PRKD3, RNF41	14/83 (0,169)	0.0163
Dopamine-DARPP32 feedback in cAMP signaling	CACNA1A, CREB1, CREBBP, CSNK1A1, CSNK1G2, EP300, GRIN1, GRIN2A, GUCY1A2, KCNJ3, KCNJ6, PLCB1, PLCB4, PLCH2, PPM1J, PPP1R14A, PPP1R14C, PPP1R1B, PPP2R2B, PRKAR2A, PRKCD, PRKD3	22/154 (0,143)	0.0211
Glutamate receptor signaling	DLG4, GNG7, GRIA1, GRIK5, GRIN1, GRIN2A, GRM5, HOMER1, PICK1, SLC17A6	10/55 (0,182	0.0242
CREB signaling in neurons	CAMK2B, CREB1, CREBBP, EP300, GNAL, GNG4, GNG7, GRIA1, GRIK5, GRIN1, GRIN2A, GRM5, MAPK3, MRAS, PIK3R2, PLCB1, PLCB4, PLCH2, POLR2A, POLR2C, PRKAR2A, PRKCD, PRKD3	23/165 (0,139)	0.0243
Neurotrophin/TRK signaling	BDNF, CREB1, CREBBP, EP300, FOS, KLK3, MAP2K4, MAPK3, MRAS, PIK3R2, SORCS1	11/63 (0,175)	0.0246
Tight junction signaling	ACTA2, CLDN4, CSTF1, FOS, INADL, MARK2, MYH1, MYH3, MYH4, MYH8, MYL1, MYL4, NSF, PPM1J, PPP2R2B, PRKAR2A, TGFB1, TGFBR1, TJP3, TNFRSF1A, VAMP3, VTI1A	22/158 (0,139)	0.0275
14-3-3 mediated signaling	FOS, GFAP, MAP2K4, MAPK3, MRAS, PIK3R2, PLCB1, PLCB4, PLCH2, PRKCD, PRKD3, TNFRSF1A, TUBA3E, TUBB3, TUBB6, YWHAB	16/109 (0,147)	0.0359
Ephrin receptor signaling	ARPC4, CFL1, CFL2, CREB1, CREBBP, EFNA1, EGF, EP300, GNAL, GNG4, GNG7, GRIN1, GRIN2A, ITGA3, ITGA4, ITGA5, MAPK3, MRAS, PGF, RAC3, SDCBP, Wasl	22/168 (0,131)	0.0496
PCP pathway	DVL3, JUNB, MAP2K4, PFN1, ROR2, SDC4, SMO, VANGL1, WNT1, WNT6, WNT16,	12/62 (0,194)	0.00878
Immune system
TREM1 signaling	CSF2, FCGR2B, IL6, ITGA5, MAPK3, MPO, Naip1 (includes others), NLRP5, TLR1, TLR2, TLR7, TREM1	12/61 (0,197)	0.0077
Production of Nitric oxide and reactive oxygen species in macrophages	APOA2, APOC2, APOD, APOE, CAT, CREBBP, FOS, MAP2K4, MAP3K1, MAP3K10, MAPK3, MPO, NOS2, PIK3R2, PPM1J, PPP1R14A, PPP1R14C, PPP2R2B, PRKCD, PRKD3, RHOH, S100A8, TLR2, TNFRSF1A	24/163 (0,147)	0.0117
IL12 signaling in macrophages	APOA2, APOC2, APOD, APOE, EP300, FOS, IFNA4, MAP2K4, MAPK3, MST1R, NOS2, PIK3R2, PRKCD, PRKD3, S100A8, TGFB1, TLR2	17/112 (0,152)	0.0234
Thrombin signaling	ARHGEF1, ARHGEF9, ARHGEF11, CAMK1, CAMK2B, CREB1, EGF, GATA3, GATA5, GNAL, GNG4, GNG7, MAPK3, MRAS, MYL1, MYL4, MYL10, PIK3R2, PLCB1, PLCB4, PLCH2, Ppp1r12b, PRKCD, PRKD3, RHOH	25/182 (0,137)	0.023
Role of pattern recognition receptors in recognition of bacteria and viruses	C3, C1QB, CREB1, CSF2, IFIH1, IFNA4, IL6, MAP2K4, MAPK3, PIK3R2, PRKCD, PRKD3, TGFB1, TLR1, TLR2, TLR7	16/112 (0,143	0.0445
Others
Calcium signaling	ACTA2, ASPH, ATP2B1, ATP2B2, CABIN1, CAMK1, CAMK2B, CHRNA2, CHRNA10, CHRNB4, CREB1, CREBBP, EP300, GRIA1, GRIN1, GRIN2A, HDAC1, MAPK3, MEF2A, MEF2B, MYH1, MYH3, MYH4, MYH8, MYL1, MYL4, PRKAR2A, SLC8A3, TNNC1, TNNC2, TNNI1, TNNI2, TNNT2, TNNT3, TP63, Tpm1, TPM3, TRDN	38/161 (0,236)	2.65e-08
Actin cytoskeleton signaling	ACTA2, ACTN1, ACTN2, ARHGEF1, ARPC4, CFL1, CFL2, CYFIP1, DIAPH1, EGF, FGF2, FGF6, FGF10, FGF23, ITGA3, ITGA4, ITGA5, MAPK3, MRAS, MYH1, MYH3, MYH4, MYH8, MYL1, MYL4, MYL10, MYLK3, PFN1, PIK3R2, PIP4K2A, Ppp1r12b, RAC3, SSH1, TTN, WASF2	35/199 (0,176)	9.78e-05
Epithelial adherens junction signaling	ACTA2, ACTN1, ACTN2, ARPC4, BMPR2, EGF, EPN1, EPN3, LEF1, MRAS, MYH1, MYH3, MYH4, MYH8, MYL1, MYL4, MYO7A, NOTCH1, PARD3, TCF3, TCF4, TGFBR1, TUBA3E, TUBB3, TUBB6	25/135 (0,185)	0.000417
Molecular mechanisms of cancer	APH1B, ARHGEF1, ARHGEF9, ARHGEF11, AURKA, BMP1, BMPR2, CAMK2B, CCND3, CDKN2A, CREBBP, EP300, FAS, FOS, GNAL, IRS1, ITGA3, ITGA4, ITGA5, LAMTOR3, LEF1, LRP6, MAP2K4, MAPK3, MRAS, MYC, Naip1 (includes others), NOTCH1, PA2G4, PIK3R2, PLCB1, PLCB4, PRKAR2A, PRKCD, PRKD3, PTCH1, PTCH2, RAC3, RHOH, SMAD6, SMO, TCF3, TCF4, TGFB1, TGFBR1, WNT1, WNT6, WNT16, WNT9B	49/350 (0,14)	0.00138
Phospholipase C signaling	AHNAK, ARHGEF1, ARHGEF9, ARHGEF1, BLNK, CD79A, CREB1, CREBBP, EP300, FCGR2B, GNG4, GNG7, HDAC1, ITGA3, ITGA4, ITGA5, MAPK3, MEF2A, MEF2B, MRAS, MYL1, MYL4, MYL10, PLA2G2F, PLCB1, PLCB4, Ppp1r12b, PPP1R14A, PRKCD, PRKD3, RHOH, RPS6KA3	32/211 (0,152)	0.00255
Adipogenesis pathway	BMPR2, CCRN4L, CDKN2A, DLK1, EBF1, EZH2, FBXW7, FGF2, FGFR3, HDAC1, KLF5, LPL, NR2F2, RBBP4, SLC2A4, SMO, TGFB1, TNFRSF1A, TXNIP, ZNF423	20/118 (0,169)	0.00442
Germ cell-Sertoli cell junction signaling	ACTA2, ACTN1, ACTN2, CFL1, CFL2, EPN1, EPN3, ITGA3, MAP2K4, MAP3K1, MAP3K10, MAPK3, MRAS, MYO7A, PIK3R2, RAC3, RHOH, TGFB1, TGFBR1, TNFRSF1A, TUBA3E, TUBB3, TUBB6	23/143 (0,161)	0.00467
Role of NFAT in cardiac hypertrophy	CABIN1, CAMK1, CAMK2B, CSNK1A1, EP300, GNG4, GNG7, HDAC1, IGF1, IL6, MAP2K4, MAP3K1, MAPK3, MEF2A, MEF2B, MRAS, PIK3R2, PLCB1, PLCB4, PLCH2, PRKAR2A, PRKCD, PRKD3, SLC8A3, TGFB1, TGFBR1	26/168 (0,155)	0.00467
Role of actin-based motility by Rho	ACTA2, ARPC4, CFL1, ITGA3, ITGA4, ITGA5, MYL1, MYL4, MYL10, PFN1, PIP4K2A, Ppp1r12b, RAC3, RHOH, Wasl	15/81 (0,185)	0.00558
cAMP-mediated signaling	ADORA2A, ADRA2C, AKAP6, AKAP7, AKAP11, AKAP13, CAMK1, CAMK2B, CHRM2, CHRM4, CREB1, CREBBP, EP300, GNAL, Htr5b, LAMTOR3, MAPK3, MC3R, OPRK1, OPRM1, PDE1A, PDE3B, PDE4A, PDE5A, PDE6G, PDE6H, PRKAR2A, RGS4, VIPR2	29/200 (0,145)	0.00745
Cardiac hypertrophy signaling	ADRA1B, ADRA2C, CACNA1A, CREB1, CREBBP, EP300, GNAL, GNG4, GNG7, IGF1, IL6, IRS1, MAP2K4, MAP3K1, MAP3K10, MAPK3, MEF2A, MEF2B, MRAS, MYL1, MYL4, MYL10, PIK3R2, PLCB1, PLCB4, PLCH2, PRKAR2A, RHOH, TGFB1, TGFBR1	30/210 (0,143)	0.0081
Guanine and Guanosine salvage I	HPRT1, PNP	2/2 (1)	0.00818
Cardiac beta adrenergic signaling	AKAP6, AKAP7, AKAP11, AKAP13, CACNA1A, GNG4, GNG7, MRAS, PDE1A, PDE3B, PDE4A, PDE5A, PDE6G, PDE6H, PPM1J, PPP1R14A, PPP1R14C, PPP2R2B, PRKAR2A, SLC8A3	20/125 (0,16)	0.00846
Phagosome formation	FCGR2B, FCGR3A/FCGR3B, Fcrls, ITGA3, ITGA4, ITGA5, PIK3R2, PLCB1, PLCB4, PLCH2, PRKCD, PRKD3, RHOH, TLR1, TLR2, TLR7	16/93 (0,172)	0.00866
RhoGDI signaling	ACTA2, ARHGAP1, ARHGEF1, ARHGEF9, ARHGEF11, ARPC4, CFL1, CFL2, CREBBP, EP300, ESR1, GNAL, GNG4, GNG7, ITGA3, ITGA4, ITGA5, MRAS, MYL1, MYL4, MYL10, PIP4K2A, RHOH, WASF2	24/163 (0,147)	0.0117
Signaling by Rho family GTPases	ACTA2, ARFIP2, ARHGEF1, ARHGEF9, ARHGEF11, ARPC4, CFL1, CFL2, CIT, CYFIP1, FOS, GFAP, GNAL, GNG4, GNG7, ITGA3, ITGA4, ITGA5, MAP2K4, MAP3K10, MAPK3, MRAS, MYL1, MYL4, MYL10, PARD3, PIK3R2, PIP4K2A, RHOH, STMN1	30/221 (0,136)	0.016
ERK5 signaling	CREB1, CREBBP, EGF, EP300, FOS, MEF2A, MEF2B, MRAS, MYC, RPS6KA3, YWHAB	11/61 (0,18)	0.0197
G protein coupled receptor signaling	ADORA2A, ADRA1B, ADRA2C, CAMK2B, CHRM2, CHRM4, CREB1, CREBBP, EP300, GNAL, GRM5, Htr5b, LAMTOR3, MAPK3, MC3R, MRAS, OPRK1, OPRM1, PDE1A, PDE3B, PDE4A, PDE5A, PDE6G, PDE6H, PIK3R2, PLCB1, PLCB4, PRKAR2A, RGS4, RGS16, VIPR2	31/241 (0,129)	0.0289
HGF signaling	CDKN2A, FOS, IL6, ITGA3, ITGA4, ITGA5, MAP2K4, MAP3K1, MAP3K10, MAPK3, MRAS, PIK3R2, PRKCD, PRKD3, PTGS2	15/98 (0,153)	0.0298
PAK signaling	ARHGAP10, CFL1, CFL2, ITGA3, ITGA4, ITGA5, MAP2K4, MAPK3, MRAS, MYL1, MYL4, MYL10, PIK3R2	13/82 (0,159)	0.032
Xenobiotic metabolism signaling	ALDH1A2, ALDH3A1, ALDH6A1, CAMK1, CAMK2B, CAT, CHST10, CHST13, CREBBP, CYP2C9, EP300, FMO5, GSTA5, Gstm3, HS3ST6, IL6, MAP2K4, MAP3K1, MAP3K10, MAPK3, MGST1, MRAS, NOS2, NR1I3, PIK3R2, PPM1J, PPP2R2B, PRKCD, PRKD3	29/226 (0,128)	0.0346
Rac signaling	ARFIP2, ARPC4, CFL1, CFL2, CYFIP1, ITGA3, ITGA4, ITGA5, MAP2K4, MAP3K1, MAPK3, MRAS, PARD3, PIK3R2, PIP4K2A	15/100 (0,15)	0.0349
Virus entry via endocytic pathway	ACTA2, CXADR, FOLR1, HLA-A, ITGA3, ITGA4, ITGA5, ITGB8, MRAS, PIK3R2, PRKCD, PRKD3, RAC3	13/83 (0,157)	0.035
TGF beta signaling	BMPR2, CREBBP, EP300, FOS, HDAC1, MAP2K4, MAPK3, MRAS, SMAD6, TGFB1, TGFBR1, VDR, ZNF423	13/84 (0,155)	0.0381
CDK5 signaling	BDNF, CACNA1A, GNAL, ITGA3, LAMA1, MAPK3, MAPK6, MRAS, PPM1J, PPP1R14A, PPP1R14C, PPP1R1B, PPP2R2B, PRKAR2A	14/93 (0,151	0.0396
Acute phase response signaling	AMBP, APOA2, C3, C1R, CRP, FOS, IL6, IL1RN, MAP2K4, MAP3K1, MAPK3, MRAS, NR3C1, PIK3R2, RBP3, SERPINF1, TCF3, TCF4, TNFRSF1A, TTR, VWF	21/155 (0,135)	0.0398
Estrogen receptor signaling	CARM1, CREBBP, DDX5, EP300, ESR1, KAT2B, MAPK3, MED14, MED16, MED12L, MRAS, NR3C1, POLR2A, POLR2C, TAF3, TAF10, THRAP3	17/121 (0,14)	0.0449
Estrogen-dependent breast cancer signaling	CREB1, CREBBP, EP300, ESR1, FOS, IGF1, MAPK3, MRAS, PIK3R2, TERT	10/61 (0,164)	0.0458
Role of Oct4 in mammalian embryonic stem cell pluripotency	AQR, CCNF, FOXD3, HOXB1, MEF2A, NANOG, NR2F2, PPP1R8	8/45 (0,178)	0.0466

## Sheet: Table S12
Transgenic specific pathways
	list of genes	ratio	p value
Nervous system
Nicotine degradation	CYP1B1, CYP2A6 (includes others), CYP2F1, CYP3A5, FMO2, GYLTL1B, INMT	0.149	0.0115
GABA receptor signalling	ADCY5, GABRA5, GABRA6, GABRG1, GNAS, SLC6A12, SLC6A13, UBD	0.133	0.0136
Catecholamine biosynthesis	DBH, TH	0.5	0.0158
Dopamine receptor signalling	ADCY5, GNAS, NCS1, PPP1R1B, PRL, SLC18A3, SLC6A3, TH	0.111	0.0367
Serotonin receptor signalling	ADCY5, GNAS, HTR2C, Htr5b, SLC18A3	0.135	0.0447
Pathogenesis of multiple sclerosis	CCL4, CXCL10	0.333	0.0367
Immune system
Antigen presentation pathway	TAP1, PSMB9, PSMB8, HLA-E, HLA-DRB5, HLA-DQA1, HLA-DOA, HLA-A, CD74	0.36	3.07e-05
Allograft rejection signalling	CD40LG, H2-K2/H2-Q9, H2-M2, HLA-A, HLA-DOA, HLA-DQA1, HLA-DQB1, HLA-DRB5, HLA-E, IL10	0.286	9.3e-06
Autoimmune thyroid disease signalling	CD40LG, CGA, HLA-A, HLA-DOA, HLA-DQA1, HLA-DQB1, HLA-DRB5, HLA-E, IL10	0.31	1.24e-05
T helper cell differentiation	CD40LG, GATA3, HLA-DOA, HLA-DQA1, HLA-DQB1, HLA-DRB5, IL10, IL12RB1, RORC, TBX21, TGFBR2, TNFRSF1A	0.194	8.69e-05
Granulocyte adhesion and diapedesis	Ccl2, CCL4, Ccl6, Ccl7, Ccl8, CCL17, CCL21, CLDN2, CLDN3, CLDN4, Cxcl9, CXCL10, CXCL13, ITGB2, MMP9, SDC4, SELPLG, TNFRSF1A, VCAM1	0.136	0.000101
IL8 signalling	ANGPT2, CDH1, EGF, FIGF, FNBP1, FOS, GNAS, GNG7, IRAK2, ITGAV, ITGB2, KDR, MAPK1, MMP9, MPO, MYL7, PRKCD, PRKCH, PTGS2, VCAM1, VEGFC	0.218	0.000376
OX40 signalling pathway	CD4, H2-K2/H2-Q9, H2-M2, HLA-A, HLA-DOA, HLA-DQA1, HLA-DQB1, HLA-DRB5, HLA-E	0.196	0.000606
Calcium induced T lymphocyte apoptosis	CD4, HLA-DOA, HLA-DQA1, HLA-DQB1, HLA-DRB5, ITPR2, NR4A1, PRKCD, PRKCH	0.17	0.00175
MIF-mediated glucocorticoid regulation	CD74, MAPK1, PLA2G3, PLA2G5, PLA2G4E, PTGS2	0.214	0.00305
Graft versus host signalling	HLA-A, HLA-DOA, HLA-DQA1, HLA-DQB1, HLA-DRB5, HLA-E	0.188	0.00613
Differential regulation of cytokine production in macrophages and T helper cells by IL17A and IL17F	CCL2, CCL4, CSF2, IL10	0.267	0.00676
CCR5 signalling in macrophages	CCL4, CD4, FOS, GNAS, GNG7, MAPK1, PRKCD, PRKCH	0.129	0.0164
Dendritic cell maturation	CD40LG, CSF2, HLA-A, HLA-DOA, HLA-DQA1, HLA-DQB1, HLA-DRB5, IL10, LEP, LEPR, LY75, MAPK1, PLCB4, TNFRSF1A	0.097	0.0223
LPS/IL1 mediated inhibition of RXR function	ALDH1A2, ALDH1A3, CPT1A, CYP2A6 (includes others), CYP3A5, FMO2, GSTM1, HMGCS2, HS6ST3, LBP, NDST3, NDST4, NR1I3, NR5A2, PLTP, PPARA, TNFRSF1A	0.089	0.0249
CCR3 signalling in eosinophils	CFL1, GNAS, GNG7, ITPR2, MAPK1, PLA2G3, PLA2G5, PLA2G4E, PLCB4, PRKCD, PRKCH	0.104	0.0252
IL17 signalling in fibroblasts	CCL2, FOS, IL17RC, LCN2, MAPK1	0.156	0.0256
B cell development	HLA-DOA, HLA-DQA1, HLA-DQB1, HLA-DRB5	0.182	0.027
IL17 signalling in gastric cells	CXCL10, FOS, IL17RC, MAPK1	0.182	0.027
Others
PXR/RXR activation	Aldh1a7, CPT1A, CYP2A6 (includes others), CYP3A5, FOXO3, GSTM1, HMGCS2, INSR, NR1I3, PPARA	0.175	0.000758
Superpathway of geranylgeranyldiphosphate biosynthesis I (via Mevalonate)	ACAT2, COX10, HADHA, HMGCS2, MVD	0.312	0.00112
Differential regulation of cytokine production in intestinal epithelial cells by IL17A and IL17F	CCL2, CCL4, CSF2, IL10, LCN2	0.294	0.00152
Mevalonate pathway	ACAT2, HADHA, HMGCS2, MVD	0.333	0.00279
VEGF ligand-receptor interactions	FIGF, FOS, KDR, MAPK1, PLA2G3, PLA2G5, PLA2G4E, PRKCD, PRKCH, VEGFC	0.145	0.00336
CXCR4 signalling	ADCY5, CD4, EGR1, FNBP1, FOS, GNAO1, GNAS, GNG7, ITPR2, MAPK1, MYL1, MYL7, MYL6B, PLCB4, PRKCD, PRKCH	0.109	0.00508
GPCR-mediated integration of enteroendocrine signalling exemplified by an L cell	ADCY5, ADCYAP1, ADRB3, GAL, GNAS, GRP, ITPR2, NPY2R, PLCB4	0.138	0.00716
Superpathway of melatonin degradation	CYP1B1, CYP2A6 (includes others), CYP2F1, CYP3A5, GYLTL1B, MPO, Sult1a1	0.159	0.00802
eNOS signalling	ADCY5, AQP1, AQP6, CHRNA4, DNM2, ESR1, FIGF, GNAS, HSPA1A/HSPA1B, ITPR2, KDR, PRKCD, PRKCH, VEGFC	0.109	0.0081
VDR/RXR signalling	BGLAP, CAMP, CSF2, CXCL10, KLK6, PRKCD, PRKCH, RXRG, SEMA3B, THBD	0.128	0.00812
Ketogenesis	ACAT2, HADHA, HMGCS2	0.333	0.00988
3-phosphoinositide degradation	DUSP1, DUSP8, INPP4B, INPP5B, INPP5E, MTMR14, PALD1, PPP1R16B, PPP1R1B, PPTC7, PTPN7, PTPRO, UBLCP1, WBP11	0.106	0.0105
Retinoate biosynthesis	AKR1C3, ALDH1A2, ALDH1A3, RBP1, RDH5	0.167	0.0198
Relaxin signalling	ADCY5, FOS, GNAO1, GNAS, GNG7, GUCY2D, MAPK1, MMP9, PDE10A, PDE4B, PDE5A, PDE6H, PDE8B	0.1	0.0209
Nitric oxide signalling in the cardiovascular system	ADRB3, FIGF, GUCY2D, ITPR2, KDR, MAPK1, PDE5A, PRKCD, PRKCH, VEGFC	0.109	0.0241
G protein signalling mediated by Tubby	GNAS, GNG7, INSR, PLCB4, TUB	0.156	0.0256
Bupropion degradation	CYP1B1, CYP2A6 (includes others), CYP2F1, CYP3A5	0.182	0.027
Eicosanoid signalling	AKR1C3, GGT1, PLA2G3, PLA2G5, PLA2G4E, PTGS2, TBXAS1	0.123	0.0307
Acetone degradation I (to Methylglyoxal)	CYP1B1, CYP2A6 (includes others), CYP2F1, CYP3A5	0.174	0.0313
tRNA splicing	PDE10A, PDE4B, PDE5A, PDE6H, PDE8B	0.147	0.0325
Estrogen biosynthesis	AKR1C3, CYP1B1, CYP2A6 (includes others), CYP2F1, CYP3A5	0.147	0.0325
Leptin signalling in obesity	ADCY5, AGRP, GNAS, LEP, LEPR, MAPK1, PLCB4, POMC	0.113	0.0324
Isoleucine degradation	ACAT2, BCAT2, HADHA	0.214	0.0351
Endothelin-1 signalling	ADCY5, FOS, GNAO1, GNAS, GUCY2D, ITPR2, MAPK1, PLA2G3, PLA2G5, PLA2G4E, PLCB4, PRKCD, PRKCH, PTGS2	0.088	0.044
PCP pathway	DVL3, FZD10, SDC4, WNT3, WNT6, WNT9A, WNT9B	0.113	0.0455
Glutathione redox reactions	GPX3, GPX6, GPX8	0.188	0.05
