# Supplementary material for: Vitamin D interacts with Esr1 and Igf1 to regulate molecular pathways relevant to Alzheimer’s disease
Source: Springer Nature journal article supplement (doi:10.1186/s13024-016-0087-2), 2016-03-01
Supplement: MOESM1 [file 13024_2016_87_MOESM1_ESM.pdf]

Supplementary table 1. List of vitamin D-related transcripts dysregulated in transgenic 5XFAD mice

| Gene Symbol | Gene Entrez Name                                                    |
|-------------|---------------------------------------------------------------------|
| AASS        | aminoadipate-semialdehyde synthase                                  |
| ABCA1       | ATP-binding cassette, sub-family A (ABC1), member 1                 |
| ABCC3       | ATP-binding cassette, sub-family C (CFTR/MRP), member 3             |
| ABCD2       | ATP-binding cassette, sub-family D (ALD), member 2                  |
| ACAA2       | acetyl-CoA acyltransferase 2                                        |
| ACACA       | acetyl-CoA carboxylase alpha                                        |
| ACAT2       | acetyl-CoA acetyltransferase 2                                      |
| ACSL1       | acyl-CoA synthetase long-chain family member 1                      |
| ACSL4       | acyl-CoA synthetase long-chain family member 4                      |
| ACTA1       | actin, alpha 1, skeletal muscle                                     |
| ACTA2       | actin, alpha 2, smooth muscle, aorta                                |
| ACVRL1      | activin A receptor type II-like 1                                   |
| ADA         | adenosine deaminase                                                 |
| ADAM17      | ADAM metallopeptidase domain 17                                     |
| ADAMTS1     | ADAM metallopeptidase with thrombospondin type 1 motif, 1           |
| ADAMTS9     | ADAM metallopeptidase with thrombospondin type 1 motif, 9           |
| ADRA1B      | adrenoceptor alpha 1B                                               |
| ADRA1D      | adrenoceptor alpha 1D                                               |
| ADRB3       | adrenoceptor beta 3                                                 |
| AEBP1       | AE binding protein 1                                                |
| AFP         | alpha-fetoprotein                                                   |
| AGPAT2      | 1-acylglycerol-3-phosphate O-acyltransferase 2                      |
| AGT         | angiotensinogen (serpin peptidase inhibitor, clade A, member 8)     |
| AHCY        | adenosylhomocysteinase                                              |
| AHR         | aryl hydrocarbon receptor                                           |
| AHRR        | aryl-hydrocarbon receptor repressor                                 |
| AK2         | adenylate kinase 2                                                  |
| AKR1B10     | aldo-keto reductase family 1, member B10 (aldose reductase)         |
| ALDH1A3     | aldehyde dehydrogenase 1 family, member A3                          |
| ALDOA       | aldolase A, fructose-bisphosphate                                   |
| ALDOB       | aldolase B, fructose-bisphosphate                                   |
| ALOX5       | arachidonate 5-lipoxygenase                                         |
| ALOX5AP     | arachidonate 5-lipoxygenase-activating protein                      |
| ALPL        | alkaline phosphatase, liver/bone/kidney                             |
| AMPH        | amphiphysin                                                         |
| ANTXR1      | anthrax toxin receptor 1                                            |
| ANXA1       | annexin A1                                                          |
| ANXA2       | annexin A2                                                          |
| APLN        | apelin                                                              |
| APOA2       | apolipoprotein A-II                                                 |
| APOBEC3B    | apolipoprotein B mRNA editing enzyme, catalytic polypeptide-like 3B |
| APOC2       | apolipoprotein C-II                                                 |
| APOE        | apolipoprotein E                                                    |

|         |                                                                                       |
|---------|---------------------------------------------------------------------------------------|
| AQP5    | aquaporin 5                                                                           |
| AR      | androgen receptor                                                                     |
| ARHGAP1 | Rho GTPase activating protein 1                                                       |
| ARHGDIB | Rho GDP dissociation inhibitor (GDI) beta                                             |
| ARID3A  | AT rich interactive domain 3A (BRIGHT-like)                                           |
| ARL4C   | ADP-ribosylation factor-like 4C                                                       |
| ARNT2   | aryl-hydrocarbon receptor nuclear translocator 2                                      |
| ARTN    | artemin                                                                               |
| ASPM    | asp (abnormal spindle) homolog, microcephaly associated (Drosophila)                  |
| ATF3    | activating transcription factor 3                                                     |
| ATG9A   | autophagy related 9A                                                                  |
| ATM     | ATM serine/threonine kinase                                                           |
| ATP5B   | ATP synthase, H <sup>+</sup> transporting, mitochondrial F1 complex, beta polypeptide |
| ATP7A   | ATPase, Cu <sup>++</sup> transporting, alpha polypeptide                              |
| AURKB   | aurora kinase B                                                                       |
| AVP     | arginine vasopressin                                                                  |
| AXIN2   | axin 2                                                                                |
| AXL     | AXL receptor tyrosine kinase                                                          |
| B2M     | beta-2-microglobulin                                                                  |
| B4GALT1 | UDP-Gal:betaGlcNAc beta 1,4- galactosyltransferase, polypeptide 1                     |
| BAK1    | BCL2-antagonist/killer 1                                                              |
| BATF    | basic leucine zipper transcription factor, ATF-like                                   |
| BATF2   | basic leucine zipper transcription factor, ATF-like 2                                 |
| BCL11A  | B-cell CLL/lymphoma 3                                                                 |
| BCL2A1  | B-cell CLL/lymphoma 11A (zinc finger protein)                                         |
| BCL3    | BCL2-related protein A1                                                               |
| BDNF    | brain-derived neurotrophic factor                                                     |
| Bex1    | brain expressed gene 1                                                                |
| BHMT    | betaine--homocysteine S-methyltransferase                                             |
| BIRC5   | baculoviral IAP repeat containing 5                                                   |
| BLNK    | B-cell linker                                                                         |
| BMF     | Bcl2 modifying factor                                                                 |
| BMP4    | bone morphogenetic protein 4                                                          |
| BMP6    | bone morphogenetic protein 6                                                          |
| BNIP3   | BCL2/adenovirus E1B 19kDa interacting protein 3                                       |
| C1QA    | complement component 1, q subcomponent, A chain                                       |
| C1QB    | complement component 1, q subcomponent, B chain                                       |
| C1R     | complement component 1, r subcomponent                                                |
| C3AR1   | complement component 3a receptor 1                                                    |
| C4A/C4B | complement component 4B (Chido blood group)                                           |
| C9orf9  | chromosome 9 open reading frame 9                                                     |
| CA9     | carbonic anhydrase IX                                                                 |
| CABIN1  | calcineurin binding protein 1                                                         |
| CACNA1S | calcium channel, voltage-dependent, L type, alpha 1S subunit                          |
| CAMP    | cathelicidin antimicrobial peptide                                                    |

|        |                                                                              |
|--------|------------------------------------------------------------------------------|
| CAPN2  | calpain 2, (m/II) large subunit                                              |
| CASP4  | caspase 4, apoptosis-related cysteine peptidase                              |
| CASP8  | caspase 8, apoptosis-related cysteine peptidase                              |
| CAT    | catalase                                                                     |
| CAV2   | caveolin 2                                                                   |
| CCK    | cholecystokinin                                                              |
| CCL17  | chemokine (C-C motif) ligand 17                                              |
| CCL2   | chemokine (C-C motif) ligand 2                                               |
| CCL3L3 | chemokine (C-C motif) ligand 3-like 3                                        |
| CCL4   | chemokine (C-C motif) ligand 4                                               |
| CCL5   | chemokine (C-C motif) ligand 5                                               |
| Ccl6   | chemokine (C-C motif) ligand 6                                               |
| Ccl7   | chemokine (C-C motif) ligand 7                                               |
| Ccl8   | chemokine (C-C motif) ligand 8                                               |
| Ccl9   | chemokine (C-C motif) ligand 9                                               |
| CCNC   | cyclin C                                                                     |
| CCNG2  | cyclin G2                                                                    |
| CCNH   | cyclin H                                                                     |
| CCNT1  | cyclin T1                                                                    |
| CCRN4L | CCR4 carbon catabolite repression 4-like ( <i>S. cerevisiae</i> )            |
| CD14   | CD14 molecule                                                                |
| CD1D   | CD1d molecule                                                                |
| CD244  | CD244 molecule, natural killer cell receptor 2B4                             |
| CD274  | CD274 molecule                                                               |
| CD3G   | CD3g molecule, gamma (CD3-TCR complex)                                       |
| CD40LG | CD40 ligand                                                                  |
| CD44   | CD44 molecule (Indian blood group)                                           |
| CD55   | CD55 molecule, decay accelerating factor for complement (Cromer blood group) |
| CD63   | CD63 molecule                                                                |
| CD68   | CD68 molecule                                                                |
| CD74   | CD74 molecule, major histocompatibility complex, class II invariant chain    |
| CD80   | CD80 molecule                                                                |
| CD82   | CD82 molecule                                                                |
| CD83   | CD83 molecule                                                                |
| CD86   | CD86 molecule                                                                |
| CD9    | CD9 molecule                                                                 |
| CDH1   | cadherin 1, type 1, E-cadherin (epithelial)                                  |
| CDKN1A | cyclin-dependent kinase inhibitor 1A (p21, Cip1)                             |
| Cdkn1c | cyclin-dependent kinase inhibitor 1C (P57)                                   |
| CDKN2A | cyclin-dependent kinase inhibitor 2A                                         |
| CDON   | cell adhesion associated, oncogene regulated                                 |
| CEBPA  | CCAAT/enhancer binding protein (C/EBP), alpha                                |
| CEBPD  | CCAAT/enhancer binding protein (C/EBP), delta                                |
| CENPA  | centromere protein A                                                         |
| CFH    | complement factor H                                                          |

|         |                                                                                                   |
|---------|---------------------------------------------------------------------------------------------------|
| CFI     | complement factor I                                                                               |
| CFTR    | cystic fibrosis transmembrane conductance regulator (ATP-binding cassette sub-family C, member 7) |
| CH25H   | cholesterol 25-hydroxylase                                                                        |
| CHAT    | choline O-acetyltransferase                                                                       |
| CHGA    | chromogranin A                                                                                    |
| CHL1    | cell adhesion molecule L1-like                                                                    |
| CHRD    | chordin                                                                                           |
| CHRM3   | cholinergic receptor, muscarinic 3                                                                |
| CHRNA2  | cholinergic receptor, nicotinic, alpha 2 (neuronal)                                               |
| CHRNB4  | cholinergic receptor, nicotinic, beta 4 (neuronal)                                                |
| CISH    | cytokine inducible SH2-containing protein                                                         |
| CLDN2   | claudin 2                                                                                         |
| CLIC5   | chloride intracellular channel 5                                                                  |
| CMPK2   | cytidine monophosphate (UMP-CMP) kinase 2, mitochondrial                                          |
| CNGA2   | cyclic nucleotide gated channel alpha 2                                                           |
| CNOT4   | CCR4-NOT transcription complex, subunit 4                                                         |
| COBL    | cordon-bleu WH2 repeat protein                                                                    |
| COL18A1 | collagen, type XVIII, alpha 1                                                                     |
| COL1A2  | collagen, type I, alpha 2                                                                         |
| COL6A3  | collagen, type VI, alpha 3                                                                        |
| CPB2    | carboxypeptidase B2 (plasma)                                                                      |
| CPLX2   | complexin 2                                                                                       |
| CPT1A   | carnitine palmitoyltransferase 2                                                                  |
| CPT2    | carnitine palmitoyltransferase 1A (liver)                                                         |
| CREB1   | cAMP responsive element binding protein 1                                                         |
| CREM    | cAMP responsive element modulator                                                                 |
| CRHR1   | corticotropin releasing hormone receptor 1                                                        |
| CRP     | C-reactive protein, pentraxin-related                                                             |
| CRYAB   | crystallin, alpha B                                                                               |
| CRYBB1  | crystallin, beta B1                                                                               |
| CSF1    | colony stimulating factor 1 (macrophage)                                                          |
| CSF1R   | colony stimulating factor 1 receptor                                                              |
| CSF2    | colony stimulating factor 2 (granulocyte-macrophage)                                              |
| CSHL1   | chorionic somatomammotropin hormone-like 1                                                        |
| CSK     | c-src tyrosine kinase                                                                             |
| CST7    | cystatin F (leukocystatin)                                                                        |
| CSTA    | cystatin A (stefin A)                                                                             |
| CTF1    | cardiotrophin 1                                                                                   |
| CTSB    | cathepsin B                                                                                       |
| CTSC    | cathepsin C                                                                                       |
| CTSD    | cathepsin D                                                                                       |
| CTSE    | cathepsin E                                                                                       |
| CTSH    | cathepsin H                                                                                       |
| CTSK    | cathepsin K                                                                                       |
| CTSS    | cathepsin S                                                                                       |

|                           |                                                                                |
|---------------------------|--------------------------------------------------------------------------------|
| CTSZ                      | cathepsin Z                                                                    |
| CXCL10                    | chemokine (C-X-C motif) ligand 10                                              |
| Cxcl11                    | chemokine (C-X-C motif) ligand 11                                              |
| CXCL12                    | chemokine (C-X-C motif) ligand 12                                              |
| CXCL13                    | chemokine (C-X-C motif) ligand 13                                              |
| CXCL16                    | chemokine (C-X-C motif) ligand 16                                              |
| CXCL6                     | chemokine (C-X-C motif) ligand 6                                               |
| Cxcl9                     | chemokine (C-X-C motif) ligand 9                                               |
| CYBA                      | cytochrome b-245, alpha polypeptide                                            |
| CYBB                      | cytochrome b-245, beta polypeptide                                             |
| CYBRD1                    | cytochrome b reductase 1                                                       |
| CYC1                      | cytochrome c-1                                                                 |
| CYCS                      | cytochrome c, somatic                                                          |
| CYLD                      | cylindromatosis (turban tumor syndrome)                                        |
| CYP17A1                   | cytochrome P450, family 17, subfamily A, polypeptide 1                         |
| CYP1B1                    | cytochrome P450, family 1, subfamily B, polypeptide 1                          |
| CYP2A6 (includes others)  | cytochrome P450, family 2, subfamily A, polypeptide 6                          |
| Cyp2c40 (includes others) | cytochrome P450, family 2, subfamily C, polypeptide 9                          |
| CYP2C9                    | cytochrome P450, family 2, subfamily c, polypeptide 40                         |
| Cyp2d9 (includes others)  | cytochrome P450, family 2, subfamily d, polypeptide 9                          |
| CYP2J2                    | cytochrome P450, family 2, subfamily J, polypeptide 2                          |
| CYP4A11                   | cytochrome P450, family 4, subfamily A, polypeptide 11                         |
| DAB2                      | Dab, mitogen-responsive phosphoprotein, homolog 2 (Drosophila)                 |
| DARS                      | aspartyl-tRNA synthetase                                                       |
| DAXX                      | death-domain associated protein                                                |
| DBH                       | dopamine beta-hydroxylase (dopamine beta-monoxygenase)                         |
| DBI                       | diazepam binding inhibitor (GABA receptor modulator, acyl-CoA binding protein) |
| DDX3X                     | DEAD (Asp-Glu-Ala-Asp) box helicase 5                                          |
| DDX5                      | DEAD (Asp-Glu-Ala-Asp) box helicase 3, X-linked                                |
| DECR2                     | 2,4-dienoyl CoA reductase 2, peroxisomal                                       |
| DHRS1                     | dehydrogenase/reductase (SDR family) member 1                                  |
| DLAT                      | dihydrolipoamide S-acetyltransferase                                           |
| DLC1                      | DLC1 Rho GTPase activating protein                                             |
| DLEC1                     | deleted in lung and esophageal cancer 1                                        |
| DLK1                      | delta-like 1 homolog (Drosophila)                                              |
| DLX3                      | distal-less homeobox 3                                                         |
| DMTF1                     | cyclin D binding myb-like transcription factor 1                               |
| DNAJC21                   | DnaJ (Hsp40) homolog, subfamily C, member 21                                   |
| DOK5                      | docking protein 5                                                              |
| DTX3                      | deltex 3, E3 ubiquitin ligase                                                  |
| DUSP2                     | dual specificity phosphatase 2                                                 |
| DUSP4                     | dual specificity phosphatase 4                                                 |
| DVL3                      | dishevelled segment polarity protein 3                                         |
| DYRK1B                    | dual-specificity tyrosine-(Y)-phosphorylation regulated kinase 1B              |
| EDN1                      | endothelin 1                                                                   |

|         |                                                                      |
|---------|----------------------------------------------------------------------|
| EDN2    | endothelin 2                                                         |
| EFNA1   | ephrin-A1                                                            |
| EGF     | epidermal growth factor                                              |
| EGLN1   | egl-9 family hypoxia-inducible factor 1                              |
| EGR1    | early growth response 1                                              |
| EGR2    | early growth response 2                                              |
| EHD4    | EH-domain containing 4                                               |
| EHHADH  | enoyl-CoA, hydratase/3-hydroxyacyl CoA dehydrogenase                 |
| EIF5A2  | eukaryotic translation initiation factor 5A2                         |
| ENPP1   | ectonucleotide pyrophosphatase/phosphodiesterase 1                   |
| ENPP2   | ectonucleotide pyrophosphatase/phosphodiesterase 2                   |
| EOMES   | eomesodermin                                                         |
| EPAS1   | endothelial PAS domain protein 1                                     |
| EPHA7   | EPH receptor A7                                                      |
| EPHX1   | epoxide hydrolase 1, microsomal (xenobiotic)                         |
| EPHX2   | epoxide hydrolase 2, cytoplasmic                                     |
| ERBB4   | erb-b2 receptor tyrosine kinase 4                                    |
| ERRFI1  | ERBB receptor feedback inhibitor 1                                   |
| ESR1    | estrogen receptor 1                                                  |
| ESR2    | estrogen receptor 2 (ER beta)                                        |
| EZR     | ezrin                                                                |
| F10     | coagulation factor VIII, procoagulant component                      |
| F11R    | coagulation factor X                                                 |
| F8      | F11 receptor                                                         |
| FAM132A | family with sequence similarity 132, member A                        |
| FAM26F  | family with sequence similarity 26, member F                         |
| FANCD2  | Fanconi anemia, complementation group D2                             |
| FAS     | Fas cell surface death receptor                                      |
| FBLN5   | fibulin 5                                                            |
| FCER1G  | Fc fragment of IgE, high affinity I, receptor for; gamma polypeptide |
| FCGR1A  | Fc fragment of IgG, high affinity Ia, receptor (CD64)                |
| FCGR2B  | Fc fragment of IgG, low affinity IIb, receptor (CD32)                |
| FERMT2  | fermitin family member 2                                             |
| FES     | FES proto-oncogene, tyrosine kinase                                  |
| FFAR2   | free fatty acid receptor 2                                           |
| FGF10   | fibroblast growth factor 2 (basic)                                   |
| FGF2    | fibroblast growth factor 10                                          |
| FGF23   | fibroblast growth factor 23                                          |
| FGFR2   | fibroblast growth factor receptor 2                                  |
| FGFR4   | fibroblast growth factor receptor 4                                  |
| FGL2    | fibrinogen-like 2                                                    |
| FHL3    | four and a half LIM domains 3                                        |
| FLNA    | filamin A, alpha                                                     |
| FLNC    | filamin C, gamma                                                     |
| FMN2    | formin 2                                                             |
| FOS     | FBJ murine osteosarcoma viral oncogene homolog                       |

|                       |                                                                                                                  |
|-----------------------|------------------------------------------------------------------------------------------------------------------|
| FOSB                  | FBJ murine osteosarcoma viral oncogene homolog B                                                                 |
| FOSL2                 | FOS-like antigen 2                                                                                               |
| FOXC1                 | forkhead box C1                                                                                                  |
| FOXC2                 | forkhead box C2                                                                                                  |
| FTL                   | ferritin, light polypeptide                                                                                      |
| FUCA1                 | fucosidase, alpha-L- 1, tissue                                                                                   |
| FUT7                  | fucosyltransferase 7 (alpha (1,3) fucosyltransferase)                                                            |
| GAD1                  | glutamate decarboxylase 1 (brain, 67kDa)                                                                         |
| GAPDH                 | glyceraldehyde-3-phosphate dehydrogenase                                                                         |
| GAS1                  | growth arrest-specific 1                                                                                         |
| GATA4                 | GATA binding protein 4                                                                                           |
| GBE1                  | glucan (1,4-alpha-), branching enzyme 1                                                                          |
| GBP2                  | guanylate binding protein 2, interferon-inducible                                                                |
| GBP5                  | guanylate binding protein 5                                                                                      |
| GBP6                  | guanylate binding protein family, member 6                                                                       |
| Gcg                   | glucagon                                                                                                         |
| GCHFR                 | GTP cyclohydrolase I feedback regulator                                                                          |
| GCK                   | glucokinase (hexokinase 4)                                                                                       |
| GDI1                  | GDP dissociation inhibitor 1                                                                                     |
| GFAP                  | glial fibrillary acidic protein                                                                                  |
| GFPT2                 | glutamine-fructose-6-phosphate transaminase 2                                                                    |
| GIGYF1                | GRB10 interacting GYF protein 1                                                                                  |
| GJD2                  | gap junction protein, delta 2, 36kDa                                                                             |
| GLIPR1                | GLI pathogenesis-related 1                                                                                       |
| GLS                   | glutaminase                                                                                                      |
| Gm21596/Hmgb1         | high mobility group box 1                                                                                        |
| GNAI2                 | guanine nucleotide binding protein (G protein), alpha inhibiting activity polypeptide 2                          |
| GNAO1                 | guanine nucleotide binding protein (G protein), alpha activating activity polypeptide O                          |
| GOT1                  | glutamic-oxaloacetic transaminase 1, soluble                                                                     |
| GP1BB                 | glycoprotein Ib (platelet), beta polypeptide                                                                     |
| GRIA2                 | glutamate receptor, ionotropic, AMPA 2                                                                           |
| GRIN1                 | glutamate receptor, ionotropic, N-methyl D-aspartate 1                                                           |
| GRM1                  | glutamate receptor, metabotropic 1                                                                               |
| GRN                   | granulin                                                                                                         |
| GSTA5                 | glutathione S-transferase alpha 5                                                                                |
| GSTM3                 | glutathione S-transferase mu 3 (brain)                                                                           |
| HADHA                 | hydroxyacyl-CoA dehydrogenase/3-ketoacyl-CoA thiolase/enoyl-CoA hydratase (trifunctional protein), alpha subunit |
| HAS2                  | hyaluronan synthase 2                                                                                            |
| HCK                   | HCK proto-oncogene, Src family tyrosine kinase                                                                   |
| HDAC9                 | histone deacetylase 9                                                                                            |
| HDGF                  | hepatoma-derived growth factor                                                                                   |
| HIST2H2AA3/HIST2H2AA4 | histone cluster 2, H2aa3                                                                                         |
| HIST4H4               | histone cluster 4, H4                                                                                            |

|                     |                                                                |
|---------------------|----------------------------------------------------------------|
| HIVEP1              | human immunodeficiency virus type I enhancer binding protein 1 |
| HK2                 | hexokinase 2                                                   |
| HLA-A               | major histocompatibility complex, class I, A                   |
| HLA-DMB             | major histocompatibility complex, class II, DM beta            |
| HLA-DQA1            | major histocompatibility complex, class II, DQ alpha 1         |
| HLA-DRB5            | major histocompatibility complex, class II, DR beta 5          |
| HLA-E               | major histocompatibility complex, class I, E                   |
| HLA-G               | major histocompatibility complex, class I, G                   |
| HMBS                | hydroxymethylbilane synthase                                   |
| HMGGA1              | high mobility group AT-hook 1                                  |
| HMGCS2              | 3-hydroxy-3-methylglutaryl-CoA synthase 2 (mitochondrial)      |
| HMOX1               | heme oxygenase 1                                               |
| HNRNPA2B1           | heterogeneous nuclear ribonucleoprotein A3                     |
| Hnrnpa3             | heterogeneous nuclear ribonucleoprotein A2/B1                  |
| HOMER1              | homer scaffolding protein 1                                    |
| HOXB1               | homeobox B1                                                    |
| HPSE                | heparanase                                                     |
| HSD11B1             | hydroxysteroid (11-beta) dehydrogenase 1                       |
| HSPA4               | heat shock 70kDa protein 4                                     |
| HSPA8               | heat shock 70kDa protein 8                                     |
| HSPB1               | heat shock 27kDa protein 1                                     |
| ICOSLG/LOC102723996 | inducible T-cell co-stimulator ligand                          |
| IFI16               | interferon, gamma-inducible protein 16                         |
| Ifi202b             | interferon activated gene 202B                                 |
| IFI35               | interferon-induced protein 35                                  |
| Ifi47               | interferon gamma inducible protein 47                          |
| IFIH1               | interferon induced with helicase C domain 1                    |
| IFIT1               | interferon-induced protein with tetratricopeptide repeats 1    |
| IFIT1B              | interferon-induced protein with tetratricopeptide repeats 1B   |
| IFIT3               | interferon-induced protein with tetratricopeptide repeats 3    |
| IFITM3              | interferon induced transmembrane protein 3                     |
| IFNA4               | interferon, alpha 4                                            |
| IFNAR2              | interferon (alpha, beta and omega) receptor 2                  |
| IFNG                | interferon, gamma                                              |
| IFNGR1              | interferon gamma receptor 1                                    |
| IGF1                | insulin-like growth factor 1 (somatomedin C)                   |
| IGF1R               | insulin-like growth factor 1 receptor                          |
| IGF2                | insulin-like growth factor 2                                   |
| IGFBP2              | insulin-like growth factor binding protein 2, 36kDa            |
| IGFBP5              | insulin-like growth factor binding protein 5                   |
| Igtp                | interferon gamma induced GTPase                                |
| IKZF2               | IKAROS family zinc finger 2 (Helios)                           |
| IL10RA              | interleukin 10 receptor, alpha                                 |
| IL13RA2             | interleukin 13 receptor, alpha 2                               |
| IL16                | interleukin 16                                                 |
| IL17RA              | interleukin 17 receptor A                                      |



|         |                                                                     |
|---------|---------------------------------------------------------------------|
| IL1B    | interleukin 1, beta                                                 |
| IL1RL1  | interleukin 1 receptor-like 1                                       |
| IL21R   | interleukin 21 receptor                                             |
| IL33    | interleukin 33                                                      |
| IL3RA   | interleukin 3 receptor, alpha (low affinity)                        |
| IL4R    | interleukin 4 receptor                                              |
| IL6R    | interleukin 6 receptor                                              |
| IL7R    | interleukin 7 receptor                                              |
| IL9R    | interleukin 9 receptor                                              |
| INHBA   | inhibin, beta A                                                     |
| INMT    | indolethylamine N-methyltransferase                                 |
| INPP5D  | inositol polyphosphate-5-phosphatase, 145kDa                        |
| INSIG2  | insulin induced gene 2                                              |
| INSR    | insulin receptor                                                    |
| INSRR   | insulin receptor-related receptor                                   |
| IRF1    | interferon regulatory factor 1                                      |
| IRF5    | interferon regulatory factor 5                                      |
| IRF6    | interferon regulatory factor 6                                      |
| IRF8    | interferon regulatory factor 8                                      |
| IRF9    | interferon regulatory factor 9                                      |
| Irgm1   | immunity-related GTPase family M member 1                           |
| IRS1    | insulin receptor substrate 1                                        |
| IRX1    | iroquois homeobox 1                                                 |
| IRX3    | iroquois homeobox 3                                                 |
| ISG15   | ISG15 ubiquitin-like modifier                                       |
| ITGA1   | integrin, alpha 1                                                   |
| ITGAM   | integrin, alpha M (complement component 3 receptor 3 subunit)       |
| ITGAX   | integrin, alpha X (complement component 3 receptor 4 subunit)       |
| ITGB2   | integrin, beta 2 (complement component 3 receptor 3 and 4 subunit)  |
| ITGB3   | integrin, beta 3 (platelet glycoprotein IIIa, antigen CD61)         |
| ITGB5   | integrin, beta 5                                                    |
| ITGB8   | integrin, beta 8                                                    |
| JRK     | Jrk homolog (mouse)                                                 |
| JUN     | Jun proto-oncogene                                                  |
| KAT2B   | K(lysine) acetyltransferase 2B                                      |
| KCND3   | potassium channel, voltage gated Shal related subfamily D, member 3 |
| KCNJ3   | potassium channel, inwardly rectifying subfamily J, member 3        |
| KCNQ2   | potassium channel, voltage gated KQT-like subfamily Q, member 2     |
| KDR     | kinase insert domain receptor                                       |
| KHSRP   | KH-type splicing regulatory protein                                 |
| KIF1A   | kinesin family member 1A                                            |
| KIRREL2 | kin of IRRE like 2 (Drosophila)                                     |
| KL      | klotho                                                              |
| KLF10   | Kruppel-like factor 10                                              |
| KLF5    | Kruppel-like factor 5 (intestinal)                                  |
| KLK3    | kallikrein-related peptidase 3                                      |

|          |                                                                                          |
|----------|------------------------------------------------------------------------------------------|
| KLK6     | kallikrein-related peptidase 6                                                           |
| KRT14    | keratin 14, type I                                                                       |
| KRT18    | keratin 18, type I                                                                       |
| KRT8     | keratin 8, type II                                                                       |
| L1CAM    | L1 cell adhesion molecule                                                                |
| LAMA3    | laminin, alpha 3                                                                         |
| LAMP2    | lysosomal-associated membrane protein 2                                                  |
| LBP      | lipopolysaccharide binding protein                                                       |
| LCN2     | lipocalin 2                                                                              |
| LCP2     | lymphocyte cytosolic protein 2 (SH2 domain containing leukocyte protein of 76kDa)        |
| LDHA     | lactate dehydrogenase A                                                                  |
| LDLR     | low density lipoprotein receptor                                                         |
| LEPR     | leptin receptor                                                                          |
| LGALS12  | lectin, galactoside-binding, soluble, 12                                                 |
| LGALS3   | lectin, galactoside-binding, soluble, 3                                                  |
| LGALS3BP | lectin, galactoside-binding, soluble, 3 binding protein                                  |
| LGR5     | leucine-rich repeat containing G protein-coupled receptor 5                              |
| LILRB4   | leukocyte immunoglobulin-like receptor, subfamily B (with TM and ITIM domains), member 4 |
| LIPA     | lipase A, lysosomal acid, cholesterol esterase                                           |
| LITAF    | lipopolysaccharide-induced TNF factor                                                    |
| LNPEP    | leucyl/cystinyl aminopeptidase                                                           |
| LPL      | lipoprotein lipase                                                                       |
| LSP1     | lymphocyte-specific protein 1                                                            |
| LSS      | lanosterol synthase (2,3-oxidosqualene-lanosterol cyclase)                               |
| LTBR     | lymphotoxin beta receptor (TNFR superfamily, member 3)                                   |
| LTC4S    | leukotriene C4 synthase                                                                  |
| LUM      | lumican                                                                                  |
| LYN      | LYN proto-oncogene, Src family tyrosine kinase                                           |
| LYZ      | lysozyme                                                                                 |
| MAD2L1   | MAD2 mitotic arrest deficient-like 1 (yeast)                                             |
| MAFB     | v-maf avian musculoaponeurotic fibrosarcoma oncogene homolog B                           |
| MAFF     | v-maf avian musculoaponeurotic fibrosarcoma oncogene homolog F                           |
| MALL     | mal, T-cell differentiation protein-like                                                 |
| MAOA     | monoamine oxidase A                                                                      |
| MAP3K8   | mitogen-activated protein kinase kinase kinase 8                                         |
| MAPK1    | mitogen-activated protein kinase 1                                                       |
| MASP2    | mannan-binding lectin serine peptidase 2                                                 |
| MAZ      | MYC-associated zinc finger protein (purine-binding transcription factor)                 |
| MBOAT2   | membrane bound O-acyltransferase domain containing 2                                     |
| MCF2L    | MCF.2 cell line derived transforming sequence-like                                       |
| MCL1     | myeloid cell leukemia 1                                                                  |
| MCM3     | minichromosome maintenance complex component 3                                           |
| MEF2C    | myocyte enhancer factor 2C                                                               |
| MEOX1    | mesenchyme homeobox 1                                                                    |

|         |                                                                                    |
|---------|------------------------------------------------------------------------------------|
| MFGE8   | milk fat globule-EGF factor 8 protein                                              |
| MGEA5   | meningioma expressed antigen 5 (hyaluronidase)                                     |
| MGMT    | O-6-methylguanine-DNA methyltransferase                                            |
| MGP     | matrix Gla protein                                                                 |
| MITF    | microphthalmia-associated transcription factor                                     |
| MKI67   | marker of proliferation Ki-67                                                      |
| MLXIPL  | MLX interacting protein-like                                                       |
| MLYCD   | malonyl-CoA decarboxylase                                                          |
| MMP11   | matrix metalloproteinase 11                                                        |
| MMP9    | matrix metalloproteinase 9                                                         |
| MPG     | N-methylpurine-DNA glycosylase                                                     |
| MPL     | MPL proto-oncogene, thrombopoietin receptor                                        |
| MPO     | myeloperoxidase                                                                    |
| MR1     | major histocompatibility complex, class I-related                                  |
| MRAS    | muscle RAS oncogene homolog                                                        |
| MSH5    | mutS homolog 5                                                                     |
| MSR1    | macrophage scavenger receptor 1                                                    |
| MST1R   | macrophage stimulating 1 receptor                                                  |
| Mt1     | metallothionein 1                                                                  |
| Mt2     | metallothionein 2                                                                  |
| MTCH2   | mitochondrial carrier 2                                                            |
| Mx1/Mx2 | MX dynamin-like GTPase 1                                                           |
| MYBL2   | v-myb avian myeloblastosis viral oncogene homolog-like 2                           |
| MYCN    | v-myc avian myelocytomatosis viral oncogene neuroblastoma derived homolog          |
| MYH2    | myosin, heavy chain 2, skeletal muscle, adult                                      |
| MYH8    | myosin, heavy chain 8, skeletal muscle, perinatal                                  |
| MYL7    | myosin, light chain 7, regulatory                                                  |
| MYLK    | myosin light chain kinase                                                          |
| MYOD1   | myogenic differentiation 1                                                         |
| NAE1    | NEDD8 activating enzyme E1 subunit 1                                               |
| NAGLU   | N-acetylglucosaminidase, alpha                                                     |
| NANOG   | Nanog homeobox                                                                     |
| NAV2    | neuron navigator 2                                                                 |
| NCF1    | neutrophil cytosolic factor 1                                                      |
| NCF2    | neutrophil cytosolic factor 2                                                      |
| NCOA7   | nuclear receptor coactivator 7                                                     |
| NDRG4   | NDRG family member 4                                                               |
| NET1    | neuroepithelial cell transforming 1                                                |
| NEURL3  | neuralized E3 ubiquitin protein ligase 3                                           |
| NF2     | neurofibromin 2 (merlin)                                                           |
| NFATC1  | nuclear factor of activated T-cells, cytoplasmic, calcineurin-dependent 1          |
| NFE2L2  | nuclear factor, erythroid 2-like 2                                                 |
| NFKB1   | nuclear factor of kappa light polypeptide gene enhancer in B-cells 1               |
| NFKBIB  | nuclear factor of kappa light polypeptide gene enhancer in B-cells inhibitor, beta |

|         |                                                                           |
|---------|---------------------------------------------------------------------------|
| NGF     | nerve growth factor (beta polypeptide)                                    |
| NID1    | nidogen 1                                                                 |
| NOS2    | nitric oxide synthase 2, inducible                                        |
| NOS3    | nitric oxide synthase 3 (endothelial cell)                                |
| NOTCH1  | notch 1                                                                   |
| NOTCH3  | notch 3                                                                   |
| NPC1L1  | NPC1-like 1                                                               |
| NPPA    | natriuretic peptide A                                                     |
| NPY     | neuropeptide Y                                                            |
| NR1D1   | nuclear receptor subfamily 1, group D, member 1                           |
| NR1I3   | nuclear receptor subfamily 1, group I, member 3                           |
| NR2C1   | nuclear receptor subfamily 2, group C, member 1                           |
| NR3C1   | nuclear receptor subfamily 3, group C, member 1 (glucocorticoid receptor) |
| NR4A1   | nuclear receptor subfamily 4, group A, member 1                           |
| NR4A2   | nuclear receptor subfamily 4, group A, member 2                           |
| NR4A3   | nuclear receptor subfamily 4, group A, member 3                           |
| NRAP    | nebulin-related anchoring protein                                         |
| NRARP   | NOTCH-regulated ankyrin repeat protein                                    |
| NRN1    | neuritin 1                                                                |
| NSF     | N-ethylmaleimide-sensitive factor                                         |
| NT5E    | 5'-nucleotidase, ecto (CD73)                                              |
| NTS     | neurotensin                                                               |
| OAS1    | 2'-5'-oligoadenylate synthetase 1, 40/46kDa                               |
| OAS2    | 2'-5'-oligoadenylate synthetase 2, 69/71kDa                               |
| OASL    | 2'-5'-oligoadenylate synthetase-like                                      |
| OGN     | osteoglycin                                                               |
| Olf1508 | olfactory receptor 1508                                                   |
| OMP     | olfactory marker protein                                                  |
| OPRM1   | opioid receptor, mu 1                                                     |
| ORAI1   | ORAI calcium release-activated calcium modulator 1                        |
| OSMR    | oncostatin M receptor                                                     |
| OXR1    | oxidation resistance 1                                                    |
| P2RX7   | purinergic receptor P2X, ligand gated ion channel, 7                      |
| P4HA1   | prolyl 4-hydroxylase, alpha polypeptide I                                 |
| PADI1   | peptidyl arginine deiminase, type I                                       |
| PAX3    | paired box 3                                                              |
| PCDH7   | protocadherin 7                                                           |
| PCLO    | piccolo presynaptic cytomatrix protein                                    |
| PCOLCE  | procollagen C-endopeptidase enhancer                                      |
| PCSK1   | proprotein convertase subtilisin/kexin type 1                             |
| PCSK2   | proprotein convertase subtilisin/kexin type 2                             |
| PCTP    | phosphatidylcholine transfer protein                                      |
| PDE3B   | phosphodiesterase 3B, cGMP-inhibited                                      |
| PDLIM2  | PDZ and LIM domain 2 (mystique)                                           |
| PENK    | proenkephalin                                                             |
| PGR     | progesterone receptor                                                     |

|                          |                                                                                         |
|--------------------------|-----------------------------------------------------------------------------------------|
| PIM2                     | Pim-2 proto-oncogene, serine/threonine kinase                                           |
| PIP5K1A                  | phosphatidylinositol-4-phosphate 5-kinase, type I, alpha                                |
| PLAC8                    | placenta-specific 8                                                                     |
| PLAU                     | plasminogen activator, urokinase                                                        |
| PLAUR                    | plasminogen activator, urokinase receptor                                               |
| PLCB1                    | phospholipase C, beta 1 (phosphoinositide-specific)                                     |
| PLD1                     | phospholipase D1, phosphatidylcholine-specific                                          |
| PLIN2                    | perilipin 2                                                                             |
| PLIN3                    | perilipin 3                                                                             |
| PLIN4                    | perilipin 4                                                                             |
| PLIN5                    | perilipin 5                                                                             |
| PLTP                     | phospholipid transfer protein                                                           |
| PLXNA2                   | plexin A2                                                                               |
| PNPLA2                   | patatin-like phospholipase domain containing 2                                          |
| POLR2C                   | polymerase (RNA) II (DNA directed) polypeptide C, 33kDa                                 |
| PPARA                    | peroxisome proliferator-activated receptor alpha                                        |
| PPIC                     | peptidylprolyl isomerase C (cyclophilin C)                                              |
| PPP1R14A                 | protein phosphatase 1, regulatory (inhibitor) subunit 14A                               |
| PPP1R1B                  | protein phosphatase 1, regulatory (inhibitor) subunit 1B                                |
| PRC1                     | protein regulator of cytokinesis 1                                                      |
| PRDM16                   | PR domain containing 16                                                                 |
| PRDX6                    | peroxiredoxin 6                                                                         |
| Prh1/Prp2                | proline rich protein HaellI subfamily 1                                                 |
| PRKCD                    | protein kinase C, delta                                                                 |
| PRKG2                    | protein kinase, cGMP-dependent, type II                                                 |
| PRL                      | prolactin                                                                               |
| PrI2c2 (includes others) | prolactin family 2, subfamily c, member 2                                               |
| PRLR                     | prolactin receptor                                                                      |
| PROCR                    | protein C receptor, endothelial                                                         |
| PSIP1                    | PC4 and SFRS1 interacting protein 1                                                     |
| PSMB8                    | proteasome (prosome, macropain) subunit, beta type, 8                                   |
| PSMB9                    | proteasome (prosome, macropain) subunit, beta type, 9                                   |
| PTCRA                    | pre T-cell antigen receptor alpha                                                       |
| PTGS1                    | prostaglandin-endoperoxide synthase 1 (prostaglandin G/H synthase and cyclooxygenase)   |
| PTGS2                    | prostaglandin-endoperoxide synthase 2 (prostaglandin G/H synthase and cyclooxygenase)   |
| PTH1H                    | parathyroid hormone-like hormone                                                        |
| PTN                      | pleiotrophin                                                                            |
| PTPN6                    | protein tyrosine phosphatase, non-receptor type 6                                       |
| PTPRC                    | protein tyrosine phosphatase, receptor type, C                                          |
| PTTG1                    | pituitary tumor-transforming 1                                                          |
| RAB5A                    | RAB5A, member RAS oncogene family                                                       |
| RAB7B                    | RAB7B, member RAS oncogene family                                                       |
| RAC2                     | ras-related C3 botulinum toxin substrate 2 (rho family, small GTP binding protein Rac2) |

|         |                                                                                        |
|---------|----------------------------------------------------------------------------------------|
| RARA    | retinoic acid receptor, alpha                                                          |
| RARRES2 | retinoic acid receptor responder (tazarotene induced) 2                                |
| RASA1   | RAS p21 protein activator (GTPase activating protein) 1                                |
| RASGRF1 | Ras protein-specific guanine nucleotide-releasing factor 1                             |
| RB1     | retinoblastoma 1                                                                       |
| RBP1    | retinol binding protein 1, cellular                                                    |
| RDH5    | retinol dehydrogenase 5 (11-cis/9-cis)                                                 |
| RECK    | reversion-inducing-cysteine-rich protein with kazal motifs                             |
| REST    | RE1-silencing transcription factor                                                     |
| RET     | ret proto-oncogene                                                                     |
| RGS16   | regulator of G-protein signaling 16                                                    |
| RGS4    | regulator of G-protein signaling 4                                                     |
| RHOB    | ras homolog family member B                                                            |
| RIPK1   | receptor (TNFRSF)-interacting serine-threonine kinase 1                                |
| RNF19B  | ring finger protein 19B                                                                |
| RNF213  | ring finger protein 213                                                                |
| RNF38   | ring finger protein 38                                                                 |
| RORA    | RAR-related orphan receptor A                                                          |
| RPE65   | retinal pigment epithelium-specific protein 65kDa                                      |
| RRM1    | ribonucleotide reductase M1                                                            |
| RSPO3   | R-spondin 3                                                                            |
| RTN4    | reticulon 4                                                                            |
| RTP4    | receptor (chemosensory) transporter protein 4                                          |
| RUNX1   | runt-related transcription factor 1                                                    |
| RXRG    | retinoid X receptor, gamma                                                             |
| S100A4  | S100 calcium binding protein A4                                                        |
| S100A8  | S100 calcium binding protein A8                                                        |
| S100A9  | S100 calcium binding protein A9                                                        |
| SALL4   | spalt-like transcription factor 4                                                      |
| SAR1A   | secretion associated, Ras related GTPase 1A                                            |
| SAT1    | spermidine/spermine N1-acetyltransferase 1                                             |
| Scd2    | stearoyl-Coenzyme A desaturase 2                                                       |
| SCG2    | secretogranin II                                                                       |
| SCTR    | secretin receptor                                                                      |
| SDC4    | syndecan 4                                                                             |
| SDK1    | sidekick cell adhesion molecule 1                                                      |
| SEC23A  | Sec23 homolog A ( <i>S. cerevisiae</i> )                                               |
| SELE    | selectin E                                                                             |
| SELPLG  | selectin P ligand                                                                      |
| SEMA3C  | sema domain, immunoglobulin domain (Ig), short basic domain, secreted, (semaphorin) 3C |
| SEMA3E  | sema domain, immunoglobulin domain (Ig), short basic domain, secreted, (semaphorin) 3E |
| SERINC1 | serine incorporator 1                                                                  |
| SERINC2 | serine incorporator 2                                                                  |
| SERP1   | stress-associated endoplasmic reticulum protein 1                                      |

|                             |                                                                                                   |
|-----------------------------|---------------------------------------------------------------------------------------------------|
| SERPINA1                    | serpin peptidase inhibitor, clade A (alpha-1 antiproteinase, antitrypsin), member 1               |
| SERPINA3                    | serpin peptidase inhibitor, clade A (alpha-1 antiproteinase, antitrypsin), member 3               |
| Serpina3g (includes others) | serine (or cysteine) peptidase inhibitor, clade A, member 3G                                      |
| SERPINE1                    | serpin peptidase inhibitor, clade E (nexin, plasminogen activator inhibitor type 1), member 1     |
| SERPING1                    | serpin peptidase inhibitor, clade G (C1 inhibitor), member 1                                      |
| SETD2                       | SET domain containing 2                                                                           |
| SF3B3                       | splicing factor 3b, subunit 3, 130kDa                                                             |
| SFI1                        | Sfi1 homolog, spindle assembly associated (yeast)                                                 |
| SGK1                        | serum/glucocorticoid regulated kinase 1                                                           |
| SGSM3                       | small G protein signaling modulator 3                                                             |
| SH3RF1                      | SH3 domain containing ring finger 1                                                               |
| SHH                         | sonic hedgehog                                                                                    |
| SIRT1                       | sirtuin 1                                                                                         |
| SKIL                        | SKI-like proto-oncogene                                                                           |
| SLC11A1                     | solute carrier family 11 (proton-coupled divalent metal ion transporter), member 1                |
| SLC18A3                     | solute carrier family 18 (vesicular acetylcholine transporter), member 3                          |
| SLC22A4                     | solute carrier family 22 (organic cation/zwitterion transporter), member 4                        |
| SLC27A5                     | solute carrier family 27 (fatty acid transporter), member 5                                       |
| SLC29A1                     | solute carrier family 29 (equilibrative nucleoside transporter), member 1                         |
| SLC2A3                      | solute carrier family 2 (facilitated glucose transporter), member 3                               |
| SLC2A4                      | solute carrier family 2 (facilitated glucose transporter), member 4                               |
| SLC2A5                      | solute carrier family 2 (facilitated glucose/fructose transporter), member 5                      |
| SLC31A1                     | solute carrier family 31 (copper transporter), member 1                                           |
| SLC38A2                     | solute carrier family 38, member 2                                                                |
| SLC39A10                    | solute carrier family 39 (zinc transporter), member 10                                            |
| SLC3A1                      | solute carrier family 3 (amino acid transporter heavy chain), member 1                            |
| SLC4A7                      | solute carrier family 4, sodium bicarbonate cotransporter, member 7                               |
| SLC6A12                     | solute carrier family 6 (neurotransmitter transporter), member 12                                 |
| SLC6A6                      | solute carrier family 6 (neurotransmitter transporter), member 6                                  |
| SLC7A11                     | solute carrier family 7 (anionic amino acid transporter light chain, xc-system), member 11        |
| SLC7A5                      | solute carrier family 7 (amino acid transporter light chain, L system), member 5                  |
| SLC9A3                      | solute carrier family 9, subfamily A (NHE3, cation proton antiporter 3), member 3                 |
| SLFN5                       | schlafen family member 5                                                                          |
| SLPI                        | secretory leukocyte peptidase inhibitor                                                           |
| SMAD9                       | SMAD family member 9                                                                              |
| SMAGP                       | small cell adhesion glycoprotein                                                                  |
| SMARCC1                     | SWI/SNF related, matrix associated, actin dependent regulator of chromatin, subfamily c, member 1 |
| SMC2                        | structural maintenance of chromosomes 2                                                           |

|         |                                                                                  |
|---------|----------------------------------------------------------------------------------|
| SMO     | smoothened, frizzled class receptor                                              |
| SNRPN   | small nuclear ribonucleoprotein polypeptide N                                    |
| SOCS3   | suppressor of cytokine signaling 3                                               |
| SOD3    | superoxide dismutase 3, extracellular                                            |
| SORCS3  | sortilin-related VPS10 domain containing receptor 3                              |
| SOX9    | SRY (sex determining region Y)-box 9                                             |
| SP110   | SP110 nuclear body protein                                                       |
| SPAG4   | sperm associated antigen 4                                                       |
| SPARC   | secreted protein, acidic, cysteine-rich (osteonectin)                            |
| SPOCK1  | sparc/osteonectin, cwcv and kazal-like domains proteoglycan (testican) 1         |
| SPOP    | speckle-type POZ protein                                                         |
| SPP1    | secreted phosphoprotein 1                                                        |
| SQRDL   | sulfide quinone reductase-like (yeast)                                           |
| SRC     | SRC proto-oncogene, non-receptor tyrosine kinase                                 |
| SREBF1  | sterol regulatory element binding transcription factor 1                         |
| SREBF2  | sterol regulatory element binding transcription factor 2                         |
| SRP54   | signal recognition particle 54kDa                                                |
| SRSF3   | serine/arginine-rich splicing factor 3                                           |
| SSBP1   | single-stranded DNA binding protein 1, mitochondrial                             |
| SST     | somatostatin                                                                     |
| SSTR2   | somatostatin receptor 2                                                          |
| ST18    | suppression of tumorigenicity 18, zinc finger                                    |
| ST3GAL1 | ST3 beta-galactoside alpha-2,3-sialyltransferase 1                               |
| STAT3   | signal transducer and activator of transcription 3 (acute-phase response factor) |
| STK10   | serine/threonine kinase 10                                                       |
| STMN1   | stathmin 1                                                                       |
| STRA6   | stimulated by retinoic acid 6                                                    |
| STX3    | syntaxin 3                                                                       |
| STXBP5  | syntaxin binding protein 5 (tomosyn)                                             |
| SYCP1   | synaptonemal complex protein 1                                                   |
| SYNPO   | synaptopodin                                                                     |
| TAP1    | transporter 1, ATP-binding cassette, sub-family B (MDR/TAP)                      |
| TAP2    | transporter 2, ATP-binding cassette, sub-family B (MDR/TAP)                      |
| TAPBP   | TAP binding protein (tapasin)                                                    |
| TBP     | TATA box binding protein                                                         |
| TBX21   | T-box 21                                                                         |
| TBXAS1  | thromboxane A synthase 1 (platelet)                                              |
| TCF12   | transcription factor 12                                                          |
| TCF3    | transcription factor 3                                                           |
| TDGF1   | teratocarcinoma-derived growth factor 1                                          |
| TEAD1   | TEA domain family member 1 (SV40 transcriptional enhancer factor)                |
| TERT    | telomerase reverse transcriptase                                                 |
| TF      | transferrin                                                                      |
| TFRC    | transferrin receptor                                                             |
| TGFB1   | transforming growth factor, beta 1                                               |



|                          |                                                                    |
|--------------------------|--------------------------------------------------------------------|
| TGFB2                    | transforming growth factor, beta 2                                 |
| TGFB1                    | transforming growth factor, beta-induced, 68kDa                    |
| TGFBR1                   | transforming growth factor, beta receptor 1                        |
| TGFBR2                   | transforming growth factor, beta receptor II (70/80kDa)            |
| TGM1                     | transglutaminase 1                                                 |
| TGM2                     | transglutaminase 2                                                 |
| Tgtp1/Tgtp2              | T cell specific GTPase 1                                           |
| TH                       | tyrosine hydroxylase                                               |
| THBD                     | thrombomodulin                                                     |
| THOC1                    | THO complex 1                                                      |
| THY1                     | Thy-1 cell surface antigen                                         |
| TIMP1                    | TIMP metalloproteinase inhibitor 1                                 |
| TIMP2                    | TIMP metalloproteinase inhibitor 2                                 |
| TK1                      | thymidine kinase 1, soluble                                        |
| TLR2                     | toll-like receptor 2                                               |
| TLR4                     | toll-like receptor 4                                               |
| TLR6                     | toll-like receptor 6                                               |
| TM4SF1                   | transmembrane 4 L six family member 1                              |
| TMEM176A                 | transmembrane protein 176A                                         |
| TMEM176B                 | transmembrane protein 176B                                         |
| TMEM98                   | transmembrane protein 98                                           |
| Tmsb4x (includes others) | thymosin, beta 4, X chromosome                                     |
| TNFAIP6                  | tumor necrosis factor, alpha-induced protein 6                     |
| TNFAIP8                  | tumor necrosis factor, alpha-induced protein 8                     |
| TNFRSF1A                 | tumor necrosis factor receptor superfamily, member 1A              |
| TNNC2                    | troponin C type 2 (fast)                                           |
| TP63                     | tumor protein p63                                                  |
| TP73                     | tumor protein p73                                                  |
| TPM3                     | tropomyosin 3                                                      |
| TRAF2                    | TNF receptor-associated factor 2                                   |
| TRAF6                    | TNF receptor-associated factor 6, E3 ubiquitin protein ligase      |
| TREM1                    | triggering receptor expressed on myeloid cells 1                   |
| TRH                      | thyrotropin-releasing hormone                                      |
| TRIM14                   | tripartite motif containing 14                                     |
| TRPC6                    | transient receptor potential cation channel, subfamily C, member 6 |
| TRPM3                    | transient receptor potential cation channel, subfamily M, member 3 |
| TSPO                     | translocator protein (18kDa)                                       |
| TTF2                     | transcription termination factor, RNA polymerase II                |
| TWIST1                   | twist family bHLH transcription factor 1                           |
| TYMP                     | thymidine phosphorylase                                            |
| UBA7                     | ubiquitin-like modifier activating enzyme 7                        |
| Ubb                      | ubiquitin B                                                        |
| UBD                      | ubiquitin D                                                        |
| UBL3                     | ubiquitin-like 3                                                   |
| UCP2                     | uncoupling protein 2 (mitochondrial, proton carrier)               |
| UCP3                     | uncoupling protein 3 (mitochondrial, proton carrier)               |

|         |                                                                                 |
|---------|---------------------------------------------------------------------------------|
| UFD1L   | ubiquitin fusion degradation 1 like (yeast)                                     |
| UGT1A6  | UDP glucuronosyltransferase 1 family, polypeptide A6                            |
| USP18   | ubiquitin specific peptidase 18                                                 |
| UTRN    | utrophin                                                                        |
| VAMP5   | vesicle-associated membrane protein 5                                           |
| VAMP8   | vesicle-associated membrane protein 8                                           |
| VAV3    | vav 3 guanine nucleotide exchange factor                                        |
| VCAM1   | vascular cell adhesion molecule 1                                               |
| VEGFA   | vascular endothelial growth factor A                                            |
| VEGFC   | vascular endothelial growth factor C                                            |
| VIM     | vimentin                                                                        |
| VIP     | vasoactive intestinal peptide                                                   |
| VLDLR   | very low density lipoprotein receptor                                           |
| VPREB1  | pre-B lymphocyte 1                                                              |
| VSNL1   | visinin-like 1                                                                  |
| VTI1A   | vesicle transport through interaction with t-SNAREs 1A                          |
| Wap     | whey acidic protein                                                             |
| WARS    | tryptophanyl-tRNA synthetase                                                    |
| WEE1    | WEE1 G2 checkpoint kinase                                                       |
| WHSC1   | Wolf-Hirschhorn syndrome candidate 1                                            |
| WISP1   | WNT1 inducible signaling pathway protein 1                                      |
| WNT10A  | wingless-type MMTV integration site family, member 10A                          |
| WNT9A   | wingless-type MMTV integration site family, member 9A                           |
| WTAP    | Wilms tumor 1 associated protein                                                |
| XAF1    | XIAP associated factor 1                                                        |
| XDH     | xanthine dehydrogenase                                                          |
| XIAP    | X-linked inhibitor of apoptosis, E3 ubiquitin protein ligase                    |
| YWHAE   | tyrosine 3-monooxygenase/tryptophan 5-monooxygenase activation protein, epsilon |
| ZFP36L1 | ZFP36 ring finger protein-like 1                                                |
| ZNF367  | zinc finger protein 367                                                         |

Dysregulated transcripts in the adult brain of 9 month-old 5XFAD transgenic female mice in comparison with wild type mice. The acronym and the full name of each gene are indicated. Genes with a VDRE are highlighted in grey.
