# Supplementary material for: Vitamin D interacts with Esr1 and Igf1 to regulate molecular pathways relevant to Alzheimer’s disease
Source: Springer Nature journal article supplement (doi:10.1186/s13024-016-0087-2), 2016-03-01

Wild type

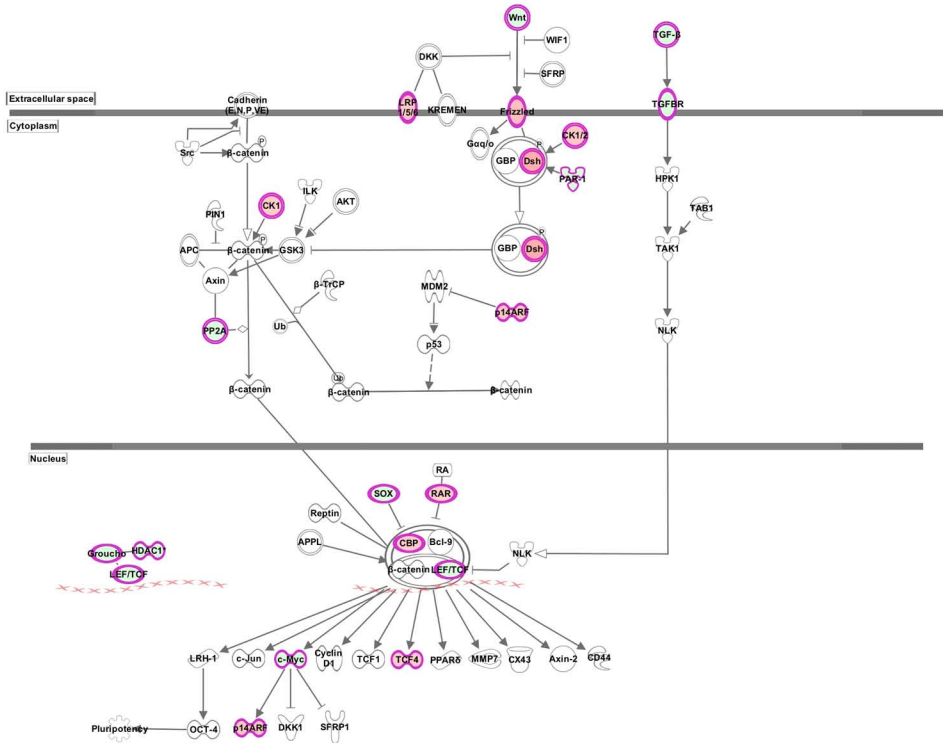

Transgenic

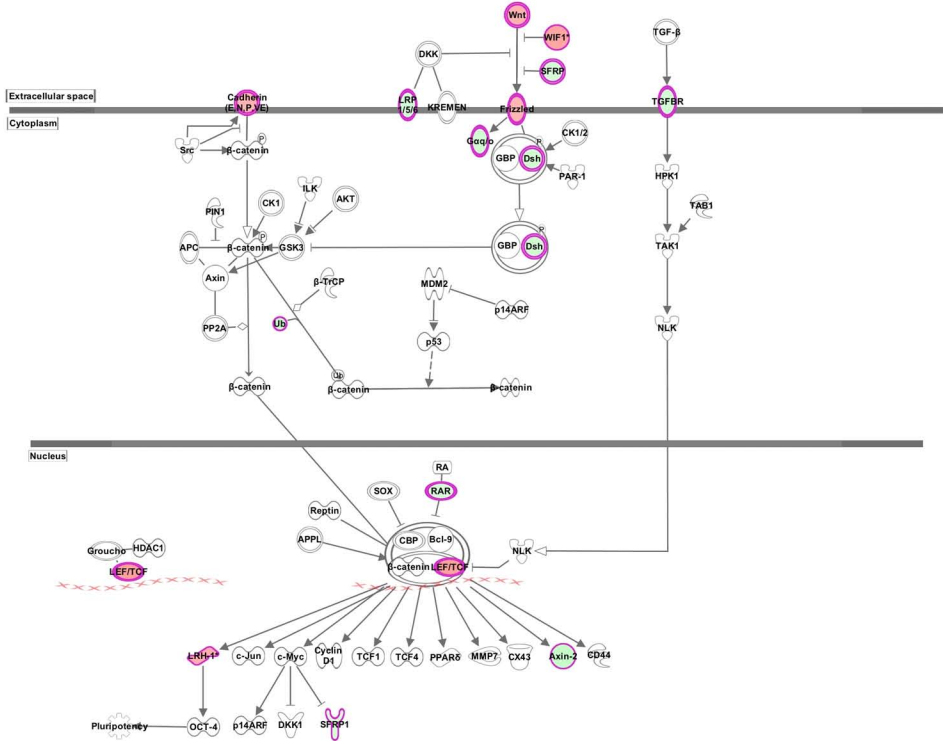

Supplement: MOESM6 [file 13024_2016_87_MOESM6_ESM.pdf]
